# Supplementary material
Source: PubMed Central journal article supplement (PMC3090528)
Supplement: NIHMS281747-supplement-01.pdf [file NIHMS281747-supplement-01.pdf]

Type of file: table

Label: Supplemental Table S1

Filename: Table S1.xls

| UniquelD      | Protein descripti  | Total s | Total | MP1      | MP2      | DC1      | DC2      | MP-BCG1  | MP-BCG2  | MP-KO1   | MP-KO2   | MP-Rv1   |
|---------------|--------------------|---------|-------|----------|----------|----------|----------|----------|----------|----------|----------|----------|
| 0610009D07Rik | RIKEN cDNA 06      | 1       | 1     | 43.84    | 0.04     | 0.04     | 0.02     | 444.76   | 303.40   | 49.17    | 0.02     | 966.38   |
| 1110020P15Rik | RIKEN cDNA 11      | 1       | 1     | 607.64   | 0.04     | 0.04     | 0.02     | 43.56    | 37.83    | 0.02     | 0.02     | 0.11     |
| 2310014H01Rik | RIKEN cDNA 23      | 9       | 2     | 388.56   | 40.61    | 12.82    | 36.29    | 41.10    | 0.02     | 30.89    | 51.25    | 25.32    |
| 2400001E08Rik | RIKEN cDNA 24      | 1       | 1     | 76.26    | 0.04     | 0.04     | 12.80    | 28.96    | 18.32    | 9.76     | 22.90    | 0.11     |
| 2610101N10Rik | RIKEN cDNA 26      | 2       | 2     | 0.03     | 168.57   | 3682.54  | 0.02     | 0.03     | 0.02     | 0.02     | 0.02     | 0.11     |
| 2900073G15Rik | RIKEN cDNA 29      | 120     | 5     | 5977.06  | 1725.27  | 360.48   | 645.41   | 583.36   | 770.47   | 3766.85  | 3586.92  | 18.47    |
| 4930403N07Rik | RIKEN cDNA 49      | 10      | 1     | 50.30    | 59.96    | 57.20    | 0.02     | 51.37    | 53.25    | 24.46    | 24.83    | 67.30    |
| 4930453N24Rik | RIKEN cDNA 49      | 1       | 1     | 0.03     | 0.04     | 0.04     | 0.02     | 0.03     | 0.02     | 0.02     | 0.02     | 0.11     |
| 4930578I06Rik | RIKEN cDNA 49      | 14      | 7     | 1579.18  | 133.43   | 598.14   | 7802.99  | 20.96    | 106.83   | 1134.32  | 995.85   | 279.56   |
| 4932415D10Rik | RIKEN cDNA 49      | 4       | 4     | 43.08    | 0.04     | 0.04     | 0.02     | 48.65    | 20.90    | 981.20   | 1114.99  | 0.11     |
| 9030624J02Rik | RIKEN cDNA 90      | 3       | 3     | 18.55    | 26.03    | 101.98   | 46.63    | 82.70    | 128.89   | 151.74   | 124.90   | 465.84   |
| AW555464      | expressed sequ     | 593     | 3     | 905.15   | 1652.84  | 1030.97  | 740.41   | 1141.27  | 934.78   | 323.28   | 301.56   | 2513.49  |
| Aaas          | achalasia, adren   | 5       | 1     | 16.37    | 0.04     | 0.04     | 0.02     | 234.74   | 108.52   | 0.02     | 0.02     | 33.95    |
| Aars          | alanyl-tRNA synt   | 8       | 2     | 57.59    | 130.04   | 191.46   | 941.74   | 7.75     | 25.66    | 52.90    | 60.51    | 99.14    |
| Abca15        | ATP-binding cas    | 8       | 3     | 1482.91  | 1271.29  | 1076.43  | 1419.44  | 2005.97  | 2101.79  | 1355.80  | 1431.76  | 437.76   |
| Abhd12        | abhydrolase don    | 14      | 1     | 325.71   | 16.38    | 20.99    | 138.54   | 22.53    | 33.28    | 120.70   | 198.64   | 0.11     |
| Acaa1a        | acetyl-Coenzym     | 34      | 2     | 1025.08  | 85.79    | 85.45    | 369.09   | 136.73   | 487.58   | 543.03   | 248.75   | 11.53    |
| Acaa1b        | acetyl-Coenzym     | 18      | 2     | 591.61   | 172.75   | 9.86     | 0.02     | 0.60     | 38.71    | 463.53   | 541.91   | 0.11     |
| Acaa2         | acetyl-Coenzym     | 24      | 5     | 228.31   | 167.98   | 75.18    | 29.62    | 187.99   | 570.40   | 479.71   | 175.94   | 2193.26  |
| Acad9         | acyl-Coenzyme /    | 12      | 6     | 75.10    | 14.53    | 105.90   | 256.40   | 228.15   | 231.97   | 59.06    | 39.73    | 16392.34 |
| Acadl         | acyl-Coenzyme /    | 121     | 7     | 523.25   | 1627.24  | 855.23   | 884.49   | 2068.91  | 1332.69  | 3525.38  | 3015.56  | 2132.14  |
| Acadm         | acyl-Coenzyme /    | 2       | 2     | 14.98    | 9.46     | 33.49    | 37.30    | 116.36   | 28.46    | 55.39    | 0.02     | 927.78   |
| Acadsb        | acyl-Coenzyme /    | 4       | 2     | 18.96    | 8.46     | 0.04     | 190.70   | 23.24    | 27.19    | 132.09   | 134.23   | 106.73   |
| Acadvl        | acyl-Coenzyme /    | 5       | 2     | 720.27   | 8638.50  | 2193.15  | 5241.60  | 322.35   | 304.23   | 0.02     | 22.56    | 134.28   |
| Acat1         | acetyl-Coenzym     | 115     | 8     | 837.06   | 430.60   | 166.49   | 947.33   | 2974.07  | 3402.18  | 1096.58  | 973.34   | 283.24   |
| Aco2          | aconitase 2, mitc  | 245     | 22    | 5228.01  | 10994.60 | 2284.60  | 6697.58  | 5867.12  | 5948.83  | 9719.26  | 10389.39 | 14947.67 |
| Acot11        | acyl-CoA thioest   | 6       | 2     | 52.60    | 53.60    | 4798.91  | 12703.44 | 0.03     | 15.59    | 22.59    | 19.06    | 1.49     |
| Acot7         | acyl-CoA thioest   | 40      | 4     | 37.34    | 10.47    | 3.25     | 38.10    | 1156.01  | 1090.84  | 140.63   | 52.40    | 66.15    |
| Acot9         | acyl-CoA thioest   | 3       | 1     | 9.07     | 16.73    | 8.86     | 49.93    | 29.93    | 34.95    | 132.10   | 147.78   | 0.11     |
| Acox3         | acyl-Coenzyme /    | 20      | 1     | 236.20   | 31.43    | 763.48   | 4.96     | 32.83    | 47.04    | 239.43   | 278.04   | 13.43    |
| Acs14         | acyl-CoA synthe    | 35      | 4     | 605.64   | 461.41   | 229.85   | 1120.16  | 151.49   | 331.16   | 443.40   | 698.26   | 247.43   |
| Acs15         | acyl-CoA synthe    | 6       | 1     | 354.74   | 81.08    | 116.93   | 13.46    | 0.03     | 13.70    | 130.28   | 131.97   | 0.11     |
| Actb12        | actin, beta-like 2 | 312     | 4     | 1309.73  | 2121.21  | 1232.06  | 437.98   | 839.28   | 836.43   | 239.30   | 374.23   | 5243.53  |
| Actc1         | actin, alpha, carc | 3325    | 6     | 5162.92  | 6141.33  | 4442.36  | 5278.62  | 4707.32  | 6082.39  | 3712.25  | 4655.08  | 33106.37 |
| Actg1         | actin, gamma, cy   | 7136    | 26    | 29897.00 | 27045.66 | 21645.45 | 21044.92 | 19130.25 | 16009.55 | 17374.02 | 19571.46 | 42528.29 |
| Actn1         | actinin, alpha 1 C | 3       | 3     | 183.09   | 84.94    | 339.81   | 193.88   | 421.94   | 351.27   | 392.17   | 332.66   | 2411.60  |

|          |                    |     |    |         |          |         |         |          |          |          |          |         |
|----------|--------------------|-----|----|---------|----------|---------|---------|----------|----------|----------|----------|---------|
| Actn4    | actinin alpha 4 G  | 129 | 11 | 1498.12 | 928.72   | 7377.46 | 2757.46 | 859.86   | 1492.02  | 1902.13  | 1609.27  | 118.07  |
| Actr1b   | ARP1 actin-relat   | 4   | 1  | 32.53   | 31.00    | 365.33  | 102.73  | 0.03     | 7.46     | 25.05    | 38.93    | 0.11    |
| Actr2    | ARP2 actin-relat   | 84  | 7  | 550.94  | 968.12   | 1327.44 | 352.78  | 1044.14  | 2530.08  | 1541.92  | 815.61   | 1222.88 |
| Actr3    | ARP3 actin-relat   | 81  | 6  | 831.27  | 251.81   | 2374.35 | 432.80  | 1491.45  | 1383.64  | 2423.77  | 2672.30  | 259.72  |
| Actr3b   | ARP3 actin-relat   | 1   | 1  | 1.84    | 2.71     | 1.61    | 0.02    | 2.55     | 0.14     | 3.76     | 1.65     | 3.50    |
| Adam4    | a disintegrin and  | 3   | 1  | 0.03    | 0.04     | 18.26   | 0.02    | 10.82    | 16.26    | 3.60     | 0.02     | 60.51   |
| Adk      | adenosine kinas    | 6   | 1  | 3.48    | 0.04     | 7.07    | 42.79   | 2.74     | 16.53    | 13.94    | 18.28    | 2.21    |
| Adrbk1   | adrenergic recep   | 25  | 7  | 2805.83 | 1503.40  | 848.09  | 6105.23 | 4405.38  | 14721.39 | 2624.55  | 802.17   | 948.96  |
| Agbl5    | ATP/GTP bindin     | 1   | 1  | 0.03    | 2.31     | 0.04    | 324.34  | 10.89    | 52.38    | 266.32   | 105.96   | 26.40   |
| Agps     | alkylglycerone pl  | 1   | 1  | 30.26   | 498.66   | 32.90   | 4.88    | 0.03     | 0.02     | 0.02     | 0.02     | 0.11    |
| Ahnak    | AHNAK nucleop      | 61  | 14 | 3113.24 | 4014.43  | 2770.50 | 5450.25 | 2304.98  | 1900.04  | 1078.87  | 1380.67  | 331.04  |
| Ahsa1    | AHA1, activator    | 15  | 2  | 0.14    | 396.56   | 50.26   | 1355.98 | 0.16     | 0.76     | 0.48     | 0.54     | 0.56    |
| Aimp2    | aminoacyl tRNA     | 12  | 1  | 241.03  | 0.04     | 0.04    | 178.58  | 122.69   | 665.30   | 0.02     | 0.02     | 0.11    |
| Ak2      | adenylate kinase   | 8   | 2  | 42.19   | 27.27    | 126.09  | 368.74  | 4.13     | 0.02     | 27.71    | 29.78    | 3713.81 |
| Ak5      | adenylate kinase   | 1   | 1  | 0.03    | 0.04     | 0.04    | 0.02    | 1.16     | 4.40     | 0.02     | 1.47     | 26.86   |
| Akr1b3   | aldo-keto reduct   | 24  | 5  | 392.50  | 362.08   | 84.92   | 1001.35 | 965.76   | 831.27   | 338.59   | 443.57   | 969.52  |
| Alb      | albumin Gene       | 2   | 2  | 461.75  | 142.61   | 19.15   | 42.52   | 353.82   | 26.80    | 492.89   | 419.48   | 263.29  |
| Alcam    | activated leukoc   | 3   | 1  | 0.03    | 0.04     | 423.45  | 33.99   | 434.35   | 422.17   | 34.82    | 86.32    | 1726.19 |
| Aldh18a1 | aldehyde dehydr    | 35  | 7  | 5972.43 | 26129.14 | 3197.89 | 2820.49 | 119.44   | 171.26   | 579.44   | 542.05   | 2700.51 |
| Aldh2    | aldehyde dehydr    | 365 | 15 | 3798.68 | 2821.28  | 3205.11 | 1864.40 | 10867.42 | 10480.68 | 10007.44 | 10570.04 | 2641.19 |
| Aldoa    | aldolase A, fruct  | 119 | 7  | 753.40  | 500.35   | 3398.29 | 4524.04 | 4927.42  | 4997.39  | 1862.78  | 2359.35  | 669.61  |
| Aldoart1 | aldolase 1, A iso  | 3   | 3  | 30.98   | 153.20   | 935.72  | 31.83   | 44.87    | 20.46    | 13.98    | 18.90    | 461.79  |
| Aldob    | aldolase B, fruct  | 84  | 2  | 35.31   | 1649.85  | 633.44  | 22.80   | 1447.57  | 881.09   | 239.86   | 457.24   | 440.86  |
| Alox5    | arachidonate 5-li  | 54  | 4  | 932.81  | 486.17   | 538.12  | 655.46  | 1491.44  | 1135.04  | 1408.39  | 1574.15  | 83.31   |
| Ank1     | ankyrin 1, erythr  | 2   | 2  | 3.77    | 22.56    | 0.04    | 1.35    | 0.03     | 45.37    | 37.44    | 14.72    | 390.54  |
| Anp32b   | acidic (leucine-ri | 28  | 2  | 108.34  | 84.63    | 1246.74 | 88.32   | 897.10   | 872.62   | 157.58   | 74.69    | 0.11    |
| Anp32e   | acidic (leucine-ri | 1   | 1  | 0.03    | 0.04     | 1231.87 | 0.02    | 0.03     | 0.02     | 8.11     | 3.65     | 20.07   |
| Anpep    | alanyl (membran    | 37  | 4  | 52.09   | 369.05   | 861.97  | 1076.31 | 179.40   | 416.79   | 233.05   | 157.50   | 1217.05 |
| Anxa1    | annexin A1 Gene    | 126 | 12 | 6923.93 | 3920.40  | 5989.46 | 4031.11 | 4667.47  | 4958.29  | 2727.29  | 2947.29  | 4237.32 |
| Anxa2    | annexin A2 Gene    | 232 | 18 | 4296.31 | 4578.77  | 2389.49 | 3913.82 | 8527.42  | 8847.91  | 10449.60 | 12112.22 | 440.27  |
| Anxa3    | annexin A3 Gene    | 58  | 10 | 1934.72 | 299.66   | 650.85  | 1156.59 | 2835.48  | 3326.83  | 1663.65  | 1758.18  | 2489.49 |
| Anxa4    | annexin A4 Gene    | 22  | 1  | 295.69  | 109.75   | 513.73  | 336.52  | 0.03     | 45.40    | 317.73   | 301.90   | 0.11    |
| Anxa5    | annexin A5 Gene    | 104 | 10 | 1248.33 | 568.67   | 7826.50 | 2373.08 | 551.24   | 523.79   | 829.86   | 720.83   | 1882.20 |
| Anxa6    | annexin A6 Gene    | 8   | 5  | 607.95  | 353.66   | 1309.07 | 493.32  | 534.91   | 397.85   | 765.04   | 891.17   | 4533.99 |
| Anxa7    | annexin A7 Gene    | 3   | 1  | 87.11   | 671.14   | 21.51   | 282.88  | 0.03     | 10.54    | 431.12   | 596.40   | 55.59   |
| Ap2b1    | adaptor-related p  | 21  | 1  | 353.41  | 0.04     | 8.15    | 46.80   | 0.03     | 9.08     | 318.86   | 333.30   | 0.11    |
| Apool    | apolipoprotein O   | 20  | 4  | 2642.23 | 643.82   | 65.70   | 2307.10 | 941.57   | 503.95   | 749.53   | 607.10   | 46.95   |

|          |                    |     |    |          |          |          |          |          |          |          |          |          |
|----------|--------------------|-----|----|----------|----------|----------|----------|----------|----------|----------|----------|----------|
| Aprt     | adenine phospho    | 1   | 1  | 56.54    | 54.94    | 661.30   | 0.02     | 629.56   | 352.96   | 0.02     | 0.02     | 0.11     |
| Arcn1    | archain 1 Gene     | 6   | 3  | 98.45    | 7621.20  | 292.64   | 7625.74  | 259.55   | 131.28   | 0.02     | 2.64     | 32.16    |
| Arf2     | ADP-ribosylation   | 37  | 1  | 169.40   | 47.73    | 0.04     | 334.95   | 268.56   | 505.09   | 414.64   | 2.27     | 0.11     |
| Arf3     | ADP-ribosylation   | 5   | 2  | 6.83     | 118.43   | 1692.18  | 510.45   | 37.06    | 22.20    | 17.65    | 16.56    | 257.49   |
| Arhgap18 | Rho GTPase act     | 53  | 8  | 3151.99  | 906.59   | 0.04     | 131.10   | 399.44   | 216.17   | 8.52     | 24.34    | 3909.35  |
| Arhgdia  | Rho GDP dissoc     | 75  | 6  | 1258.78  | 1266.03  | 1327.29  | 2557.27  | 1684.07  | 1766.41  | 1177.09  | 1218.17  | 223.82   |
| Arhgdib  | Rho, GDP dissoc    | 33  | 4  | 0.03     | 5350.32  | 3761.05  | 13231.23 | 55.93    | 56.85    | 9.17     | 44.02    | 0.11     |
| Arhgef1  | Rho guanine nuc    | 2   | 2  | 0.03     | 51.21    | 0.04     | 0.02     | 32.46    | 48.76    | 0.02     | 0.02     | 106.74   |
| Arid3a   | AT rich interactiv | 3   | 3  | 454.00   | 0.04     | 0.04     | 1.57     | 589.06   | 78.94    | 0.02     | 0.02     | 0.11     |
| Arl6ip5  | ADP-ribosylation   | 18  | 3  | 24.48    | 38.14    | 951.61   | 327.70   | 248.72   | 241.67   | 0.02     | 23.24    | 79.50    |
| Arl8a    | ADP-ribosylation   | 4   | 1  | 42.23    | 22.52    | 20.60    | 1145.75  | 33.16    | 11.22    | 23.82    | 27.20    | 33.05    |
| Arl8b    | ADP-ribosylation   | 24  | 3  | 152.30   | 110.41   | 30.09    | 27.86    | 314.89   | 374.26   | 62.61    | 130.01   | 133.31   |
| Arpc2    | actin related prof | 11  | 1  | 35.80    | 0.04     | 225.09   | 2418.57  | 43.78    | 55.59    | 0.02     | 0.02     | 0.11     |
| Arpc3    | actin related prof | 45  | 2  | 473.86   | 291.85   | 487.42   | 471.76   | 1030.93  | 822.57   | 228.96   | 361.58   | 2230.84  |
| Arpc4    | actin related prof | 51  | 3  | 255.51   | 405.54   | 112.11   | 133.29   | 731.26   | 392.76   | 169.17   | 249.48   | 217.01   |
| Arpc5l   | actin related prof | 1   | 1  | 0.03     | 0.04     | 0.04     | 0.02     | 15.44    | 0.02     | 9.33     | 0.02     | 0.11     |
| Asah1    | N-acylsphingosir   | 5   | 2  | 616.33   | 132.08   | 207.10   | 48.40    | 100.22   | 99.46    | 671.67   | 659.93   | 88.03    |
| Ascc3    | activating signal  | 3   | 3  | 16.02    | 47.39    | 18.76    | 2.91     | 201.35   | 273.65   | 59.08    | 92.89    | 2562.53  |
| Asns     | asparagine synth   | 20  | 5  | 282.44   | 101.63   | 13.80    | 61.43    | 490.20   | 420.08   | 315.72   | 349.04   | 868.47   |
| Atg7     | autophagy-relate   | 8   | 1  | 15.69    | 37.07    | 241.64   | 353.75   | 163.79   | 113.22   | 17.06    | 9.62     | 3.64     |
| Atic     | 5-aminoimidazol    | 20  | 6  | 2249.15  | 1439.26  | 133.76   | 560.90   | 1432.71  | 785.27   | 1040.36  | 1197.94  | 342.66   |
| Atp1a1   | ATPase, Na+/K+     | 36  | 5  | 2600.85  | 1794.21  | 11404.92 | 889.91   | 799.58   | 375.87   | 329.07   | 129.40   | 629.42   |
| Atp1a2   | ATPase, Na+/K+     | 1   | 1  | 1.41     | 0.04     | 0.48     | 0.02     | 0.03     | 0.02     | 0.02     | 0.02     | 0.11     |
| Atp1b3   | ATPase, Na+/K+     | 18  | 1  | 540.38   | 603.15   | 433.61   | 256.98   | 1263.09  | 1144.19  | 355.70   | 605.67   | 561.35   |
| Atp2a2   | ATPase, Ca++ tr    | 28  | 2  | 583.02   | 331.46   | 0.04     | 0.02     | 318.85   | 358.85   | 1115.77  | 1238.57  | 0.11     |
| Atp2a3   | ATPase, Ca++ tr    | 6   | 1  | 25.07    | 0.04     | 5.62     | 239.22   | 212.24   | 175.68   | 242.30   | 12.85    | 563.36   |
| Atp2b2   | ATPase, Ca++ tr    | 7   | 4  | 0.03     | 0.04     | 0.04     | 0.02     | 0.03     | 0.02     | 3267.94  | 3151.00  | 0.11     |
| Atp5a1   | ATP synthase, H    | 389 | 17 | 13544.13 | 12077.44 | 4475.26  | 19518.60 | 9318.13  | 10480.70 | 15321.85 | 12307.18 | 11996.43 |
| Atp5b    | ATP synthase, H    | 981 | 31 | 27236.87 | 28731.17 | 16757.18 | 13256.06 | 23063.46 | 25960.68 | 43596.50 | 38318.71 | 7192.16  |
| Atp5c1   | ATP synthase, H    | 3   | 1  | 0.03     | 0.04     | 24.50    | 0.02     | 0.03     | 0.02     | 180.94   | 7.79     | 0.11     |
| Atp5h    | ATP synthase, H    | 78  | 8  | 5541.38  | 7283.42  | 484.55   | 2123.59  | 2471.31  | 1844.75  | 3445.39  | 3652.19  | 433.90   |
| Atp5j    | ATP synthase, H    | 70  | 5  | 1123.87  | 631.91   | 0.04     | 216.90   | 1339.43  | 1708.79  | 1139.68  | 819.86   | 1850.62  |
| Atp5j2   | ATP synthase, H    | 68  | 2  | 2330.20  | 1086.56  | 65.56    | 155.87   | 1309.97  | 889.25   | 2012.70  | 1668.40  | 15.93    |
| Atp5o    | ATP synthase, H    | 141 | 9  | 2589.75  | 3303.90  | 811.47   | 1091.84  | 2517.04  | 2792.06  | 3075.49  | 3294.29  | 177.25   |
| Atp6v0c  | ATPase, H+ tran    | 10  | 1  | 127.16   | 0.04     | 0.04     | 0.02     | 221.67   | 65.61    | 179.20   | 335.88   | 0.11     |
| Atp6v1a  | ATPase, H+ tran    | 32  | 6  | 623.44   | 4098.22  | 1075.82  | 1906.67  | 1129.15  | 926.99   | 1671.96  | 1971.38  | 8325.71  |
| Atp6v1b2 | ATPase, H+ tran    | 12  | 5  | 423.17   | 444.23   | 329.16   | 5.50     | 309.56   | 221.45   | 577.69   | 211.41   | 176.01   |

|          |                    |     |    |          |         |         |          |          |          |          |          |         |
|----------|--------------------|-----|----|----------|---------|---------|----------|----------|----------|----------|----------|---------|
| Atp6v1e1 | ATPase, H+ tran    | 57  | 7  | 1102.64  | 215.14  | 2468.14 | 3227.32  | 1336.52  | 1237.85  | 1006.18  | 1241.65  | 604.52  |
| Atp6v1f  | ATPase, H+ tran    | 1   | 1  | 0.03     | 0.08    | 38.44   | 5.71     | 21.05    | 81.66    | 0.02     | 0.80     | 23.28   |
| BC005624 | cDNA sequence      | 38  | 1  | 42.37    | 74.77   | 14.98   | 0.02     | 44.37    | 35.31    | 32.11    | 30.60    | 65.38   |
| BC017643 | cDNA sequence      | 2   | 1  | 21.99    | 27.11   | 207.42  | 11.17    | 0.03     | 0.02     | 0.02     | 14.22    | 9.31    |
| BC019943 | cDNA sequence      | 2   | 2  | 9.98     | 0.04    | 0.04    | 0.02     | 0.03     | 0.02     | 0.02     | 0.02     | 48.81   |
| BC024139 | cDNA sequence      | 1   | 1  | 2.74     | 1.97    | 4.24    | 0.02     | 32.33    | 21.42    | 1.03     | 0.02     | 0.11    |
| Banf1    | barrier to autoint | 46  | 3  | 2694.47  | 1618.28 | 158.68  | 140.09   | 266.52   | 721.42   | 706.27   | 917.87   | 50.28   |
| Bat1a    | HLA-B-associate    | 86  | 6  | 717.97   | 968.00  | 215.49  | 693.09   | 1381.48  | 1644.35  | 2341.29  | 2330.80  | 84.37   |
| Bhmt     | betaine-homocys    | 32  | 3  | 56.71    | 76.38   | 192.90  | 170.86   | 37.26    | 11.99    | 81.07    | 49.68    | 267.95  |
| Bin1     | bridging integrat  | 1   | 1  | 124.70   | 70.37   | 0.04    | 0.02     | 232.61   | 246.64   | 124.91   | 189.39   | 17.89   |
| Blvra    | biliverdin reducta | 3   | 1  | 27.73    | 0.04    | 63.17   | 10.52    | 0.03     | 0.02     | 13.93    | 20.88    | 1355.66 |
| Bri3bp   | Bri3 binding prot  | 13  | 1  | 80.44    | 0.04    | 0.04    | 0.02     | 0.03     | 0.02     | 344.97   | 447.86   | 0.11    |
| Brp44    | brain protein 44   | 3   | 1  | 120.04   | 0.04    | 0.04    | 0.02     | 0.03     | 0.02     | 106.59   | 103.26   | 0.11    |
| Brunol6  | bruno-like 6, RN   | 3   | 1  | 96.94    | 195.45  | 560.92  | 17.66    | 32.02    | 0.02     | 2.41     | 0.02     | 8.34    |
| Btbd3    | BTB (POZ) doma     | 1   | 1  | 0.03     | 0.04    | 0.04    | 0.02     | 0.03     | 0.02     | 0.02     | 0.02     | 0.11    |
| Btf3     | basic transcriptic | 6   | 1  | 495.38   | 391.03  | 321.13  | 3120.64  | 566.40   | 35.18    | 0.02     | 0.02     | 0.11    |
| Bub3     | budding uninhibi   | 3   | 2  | 5.01     | 4.17    | 37.84   | 0.02     | 10.88    | 28.89    | 4.67     | 8.44     | 166.22  |
| C1qbp    | complement corr    | 104 | 4  | 6804.40  | 4735.61 | 6366.75 | 3286.01  | 1919.04  | 2398.58  | 3256.46  | 3996.00  | 14.62   |
| Cables1  | CDK5 and Abl ei    | 217 | 18 | 3776.72  | 2746.82 | 1838.28 | 676.11   | 8187.79  | 5745.93  | 2150.97  | 2284.15  | 3801.14 |
| Cacybp   | calcyclin binding  | 3   | 1  | 424.45   | 28.58   | 0.04    | 41.97    | 77.16    | 20.17    | 7.76     | 12.13    | 0.11    |
| Calm1    | calmodulin 1 Ge    | 131 | 6  | 6729.21  | 3126.63 | 693.59  | 12755.56 | 7776.50  | 5972.86  | 4488.80  | 3710.02  | 1323.10 |
| Calr     | calreticulin Gene  | 477 | 14 | 5244.97  | 1667.33 | 2533.13 | 20402.69 | 10680.37 | 23380.37 | 14219.61 | 8057.65  | 5134.00 |
| Cand1    | cullin associated  | 4   | 2  | 203.76   | 80.49   | 1644.74 | 29.98    | 190.92   | 21.89    | 80.92    | 236.41   | 783.07  |
| Canx     | calnexin Gene      | 315 | 16 | 12441.87 | 6657.93 | 6417.67 | 4383.93  | 8461.59  | 6891.81  | 8873.87  | 10421.72 | 1221.78 |
| Cap1     | CAP, adenylyate    | 71  | 9  | 97.68    | 789.55  | 2035.71 | 1081.96  | 1796.85  | 1406.64  | 766.97   | 1194.67  | 147.93  |
| Capg     | capping protein (  | 138 | 7  | 2786.25  | 2153.76 | 1598.53 | 5144.12  | 4282.07  | 4116.06  | 1353.23  | 1606.47  | 500.59  |
| Capza1   | capping protein (  | 76  | 4  | 115.61   | 1578.14 | 169.05  | 1070.12  | 33.10    | 117.16   | 80.57    | 34.29    | 379.60  |
| Capza2   | capping protein (  | 81  | 6  | 2781.91  | 1306.31 | 302.33  | 455.58   | 1820.24  | 1823.75  | 1946.08  | 1727.88  | 3905.21 |
| Capzb    | capping protein (  | 31  | 3  | 56.15    | 0.04    | 0.04    | 68.68    | 100.26   | 129.32   | 818.54   | 1183.39  | 2438.71 |
| Cat      | catalase Gene      | 24  | 4  | 57.80    | 126.36  | 100.70  | 334.92   | 542.07   | 453.55   | 122.44   | 137.33   | 263.93  |
| Cbfb     | core binding fact  | 4   | 1  | 131.37   | 125.37  | 2526.20 | 150.49   | 246.68   | 193.43   | 9.54     | 5.62     | 0.11    |
| Cbx1     | chromobox hom      | 15  | 1  | 790.90   | 1666.11 | 128.47  | 628.09   | 0.03     | 0.02     | 220.76   | 83.09    | 0.11    |
| Ccdc105  | coiled-coil domai  | 8   | 3  | 4342.93  | 3890.75 | 50.81   | 16016.71 | 207.26   | 369.88   | 0.02     | 11.35    | 935.03  |
| Ccdc147  | coiled-coil domai  | 5   | 2  | 222.08   | 2651.15 | 1470.23 | 0.02     | 993.84   | 940.65   | 431.56   | 364.86   | 28.20   |
| Ccdc81   | coiled-coil domai  | 3   | 1  | 0.03     | 0.04    | 0.04    | 0.02     | 16.66    | 0.02     | 22.98    | 0.02     | 0.11    |
| Ccdc9    | coiled-coil domai  | 2   | 1  | 0.03     | 0.04    | 0.04    | 0.02     | 70.19    | 91.72    | 17.97    | 18.95    | 1433.96 |
| Ccl27a   | chemokine (C-C     | 3   | 1  | 33.44    | 0.04    | 0.04    | 0.02     | 28.47    | 33.60    | 148.88   | 228.70   | 496.84  |

|         |                     |     |    |         |         |          |         |         |         |         |         |         |
|---------|---------------------|-----|----|---------|---------|----------|---------|---------|---------|---------|---------|---------|
| Ccnb2   | cyclin B2 Gene      | 3   | 2  | 59.12   | 4.95    | 93.91    | 0.02    | 177.38  | 208.52  | 52.42   | 15.81   | 0.11    |
| Cct3    | chaperonin cont     | 83  | 9  | 1270.23 | 202.89  | 217.55   | 407.64  | 911.71  | 696.51  | 2575.13 | 2735.45 | 348.44  |
| Cct4    | chaperonin cont     | 25  | 6  | 126.00  | 3.68    | 1160.32  | 68.93   | 251.95  | 297.85  | 595.49  | 437.16  | 25.09   |
| Cct5    | chaperonin cont     | 13  | 3  | 22.18   | 203.07  | 12590.28 | 632.67  | 62.52   | 28.14   | 184.70  | 307.53  | 19.36   |
| Cct6a   | chaperonin cont     | 33  | 5  | 0.03    | 554.05  | 205.17   | 1714.59 | 1215.38 | 1069.42 | 384.23  | 519.86  | 412.47  |
| Cct6b   | chaperonin cont     | 4   | 2  | 107.27  | 7.23    | 51.00    | 3740.14 | 268.81  | 1700.26 | 3034.04 | 1096.30 | 1727.80 |
| Cct7    | chaperonin cont     | 51  | 4  | 324.16  | 1585.02 | 121.40   | 733.22  | 1216.78 | 1065.94 | 1350.21 | 1265.97 | 84.65   |
| Cct8    | chaperonin cont     | 21  | 4  | 146.48  | 246.44  | 2133.55  | 7.80    | 281.50  | 388.55  | 164.37  | 275.64  | 0.11    |
| Cd14    | CD14 antigen Ge     | 25  | 4  | 1148.55 | 212.59  | 77.71    | 25.46   | 235.25  | 134.68  | 779.07  | 1043.31 | 3276.26 |
| Cd63    | CD63 antigen Ge     | 8   | 1  | 135.90  | 158.64  | 0.04     | 0.02    | 113.73  | 148.52  | 258.72  | 210.24  | 0.11    |
| Cdc37   | cell division cycle | 1   | 1  | 0.03    | 0.04    | 0.04     | 18.55   | 0.03    | 0.02    | 60.80   | 5.77    | 0.11    |
| Ceacam3 | carcinoembryoni     | 6   | 4  | 126.01  | 39.14   | 1051.32  | 441.07  | 157.69  | 2.19    | 218.70  | 211.09  | 463.21  |
| Cep110  | centrosomal prof    | 8   | 2  | 342.27  | 846.98  | 154.19   | 163.29  | 173.92  | 337.27  | 738.79  | 706.73  | 1672.22 |
| Cep76   | centrosomal prof    | 1   | 1  | 0.03    | 0.04    | 0.04     | 0.02    | 10.89   | 46.25   | 0.02    | 0.02    | 1501.25 |
| Cept1   | choline/ethanola    | 4   | 1  | 190.61  | 81.61   | 0.04     | 0.02    | 104.99  | 88.05   | 301.74  | 340.00  | 1404.06 |
| Cfl1    | cofilin 1, non-mu   | 37  | 6  | 1007.75 | 122.61  | 5818.28  | 451.69  | 451.22  | 333.78  | 1056.75 | 1259.84 | 59.27   |
| Chchd3  | coiled-coil-helix-c | 2   | 1  | 2.12    | 8.32    | 5.01     | 0.02    | 0.03    | 0.02    | 0.16    | 0.65    | 0.11    |
| Chd4    | chromodomain h      | 4   | 2  | 181.67  | 2.41    | 4.12     | 4.71    | 68.81   | 6.23    | 0.24    | 1.02    | 34.68   |
| Ckb     | creatine kinase,    | 17  | 4  | 1284.07 | 2068.03 | 1885.77  | 4275.48 | 1633.44 | 1686.53 | 481.32  | 537.95  | 7379.79 |
| Clec10a | C-type lectin don   | 16  | 2  | 729.94  | 223.71  | 0.04     | 0.02    | 2237.23 | 2090.36 | 1271.97 | 1491.29 | 63.56   |
| Clic1   | chloride intracell  | 44  | 2  | 271.22  | 116.58  | 175.53   | 67.10   | 2797.48 | 2348.12 | 308.44  | 325.24  | 74.79   |
| Clpp    | caseinolytic pept   | 7   | 1  | 4.70    | 12.56   | 0.04     | 0.02    | 1.58    | 0.02    | 0.26    | 0.02    | 0.11    |
| Clptm1  | cleft lip and palat | 7   | 3  | 558.66  | 439.06  | 277.60   | 0.02    | 313.91  | 173.80  | 1.67    | 0.28    | 4.11    |
| Cltc    | clathrin, heavy p   | 177 | 27 | 2344.68 | 4768.12 | 4598.50  | 4292.10 | 4370.55 | 4451.42 | 3832.46 | 4000.93 | 2496.33 |
| Cmas    | cytidine monoph     | 1   | 1  | 885.77  | 387.41  | 0.04     | 78.19   | 378.54  | 266.29  | 0.02    | 0.02    | 0.11    |
| Cmpk1   | cytidine monoph     | 3   | 1  | 5.07    | 0.04    | 1587.82  | 0.02    | 0.03    | 0.02    | 0.02    | 11.83   | 0.11    |
| Cndp2   | CNDP dipeptidase    | 14  | 6  | 23.21   | 22.12   | 488.06   | 397.03  | 224.08  | 197.31  | 106.85  | 91.22   | 556.02  |
| Cnpy2   | canopy 2 homolo     | 12  | 1  | 18.20   | 0.04    | 33.77    | 539.01  | 14.18   | 283.42  | 43.12   | 0.02    | 0.11    |
| Cnpy4   | canopy 4 homolo     | 3   | 1  | 0.03    | 0.04    | 0.04     | 47.42   | 0.03    | 0.02    | 0.02    | 0.02    | 21.15   |
| Cog4    | component of oli    | 5   | 3  | 69.64   | 105.47  | 69.91    | 75.88   | 132.09  | 102.10  | 110.44  | 103.10  | 34.60   |
| Copa    | coatomer proteir    | 4   | 2  | 0.03    | 7.40    | 0.04     | 401.50  | 71.79   | 51.66   | 0.02    | 0.02    | 16.54   |
| Copb1   | coatomer proteir    | 18  | 2  | 0.03    | 51.46   | 778.24   | 465.80  | 24.36   | 68.82   | 15.73   | 12.76   | 110.85  |
| Copb2   | coatomer proteir    | 10  | 3  | 1379.92 | 684.25  | 42.75    | 956.30  | 1979.62 | 989.02  | 0.02    | 9.73    | 9.64    |
| Coro1a  | coronin, actin bir  | 44  | 2  | 0.03    | 55.60   | 839.46   | 852.73  | 3.48    | 3.63    | 0.02    | 0.02    | 0.11    |
| Cox4i1  | cytochrome c ox     | 63  | 5  | 6100.53 | 3003.38 | 302.40   | 928.31  | 5106.63 | 3475.84 | 860.17  | 1199.61 | 0.11    |
| Cox5a   | cytochrome c ox     | 140 | 7  | 6343.07 | 4090.19 | 1334.27  | 3083.33 | 2738.96 | 2363.44 | 1447.31 | 1136.94 | 2276.33 |
| Cox5b   | cytochrome c ox     | 40  | 1  | 664.80  | 919.86  | 59.32    | 245.74  | 836.92  | 1066.78 | 471.31  | 393.46  | 975.51  |

|               |                                              |    |   |         |         |         |         |         |         |         |         |         |
|---------------|----------------------------------------------|----|---|---------|---------|---------|---------|---------|---------|---------|---------|---------|
| Cox6a1        | cytochrome c oxidase subunit 6a1             | 18 | 2 | 3376.36 | 6810.25 | 288.94  | 56.98   | 157.18  | 88.95   | 71.16   | 47.62   | 99.23   |
| Cox7a2        | cytochrome c oxidase subunit 7a2             | 9  | 1 | 1364.81 | 406.78  | 4885.17 | 510.73  | 562.87  | 153.72  | 48.50   | 103.57  | 2.23    |
| Cpox          | coproporphyrinogen III synthase              | 2  | 2 | 0.03    | 0.04    | 0.04    | 111.91  | 0.03    | 0.02    | 0.02    | 0.02    | 32.36   |
| Cps1          | carbamoyl-phosphate synthase (mitochondrial) | 5  | 1 | 351.35  | 497.78  | 88.07   | 124.89  | 139.28  | 56.27   | 148.80  | 112.77  | 48.89   |
| Creg1         | cellular repressor 1                         | 2  | 1 | 2.12    | 5.56    | 0.04    | 809.67  | 0.03    | 3.73    | 0.02    | 0.02    | 5.91    |
| Cs            | citrate synthase                             | 92 | 6 | 801.19  | 580.91  | 335.33  | 287.61  | 4876.01 | 3825.92 | 3137.13 | 4053.31 | 403.29  |
| Csrp1         | cysteine and glycine aminotransferase        | 19 | 1 | 10.13   | 96.92   | 149.35  | 103.27  | 0.03    | 0.02    | 114.84  | 2.09    | 0.11    |
| Cstb          | cystatin B Gene                              | 8  | 2 | 10.15   | 1673.15 | 2494.79 | 384.66  | 0.03    | 0.02    | 1.27    | 0.02    | 43.89   |
| Ctsc          | cathepsin C Gene                             | 16 | 2 | 211.09  | 231.57  | 0.04    | 176.53  | 55.82   | 40.52   | 146.42  | 166.95  | 193.93  |
| Ctsd          | cathepsin D Gene                             | 1  | 1 | 0.03    | 0.04    | 82.88   | 0.02    | 0.03    | 0.02    | 0.02    | 0.02    | 0.11    |
| Ctss          | cathepsin S Gene                             | 28 | 2 | 449.66  | 199.37  | 596.81  | 370.35  | 473.42  | 569.56  | 441.04  | 583.43  | 78.83   |
| Ctsz          | cathepsin Z Gene                             | 2  | 1 | 5.54    | 869.17  | 33.44   | 0.02    | 2.34    | 4.46    | 0.42    | 0.02    | 0.11    |
| Cyb5b         | cytochrome b5 tyrosine hydroxylase           | 12 | 1 | 1762.20 | 809.37  | 0.04    | 19.38   | 0.03    | 0.02    | 402.32  | 340.62  | 35.14   |
| Cyb5r1        | cytochrome b5 reductase                      | 2  | 1 | 337.86  | 68.86   | 737.98  | 340.72  | 174.22  | 160.49  | 155.11  | 141.52  | 0.11    |
| Cyb5r3        | cytochrome b5 reductase 3                    | 72 | 7 | 4898.27 | 3500.84 | 534.12  | 448.96  | 3017.36 | 2851.84 | 3978.74 | 4472.28 | 370.47  |
| Cyc1          | cytochrome c-1 (cytochrome c)                | 41 | 3 | 1598.05 | 129.49  | 93.59   | 359.61  | 1798.44 | 1870.27 | 1261.57 | 440.89  | 26.11   |
| Cyfp1         | cytoplasmic FMF                              | 5  | 2 | 25.57   | 82.16   | 105.76  | 252.33  | 50.61   | 52.63   | 34.08   | 32.55   | 34.39   |
| Cyfp2         | cytoplasmic FMF                              | 2  | 2 | 616.51  | 485.44  | 617.71  | 2076.36 | 983.47  | 844.46  | 429.08  | 376.21  | 1151.74 |
| Cyp24a1       | cytochrome P450 24A1                         | 4  | 4 | 64.10   | 127.85  | 333.17  | 107.79  | 0.03    | 0.02    | 0.02    | 1.16    | 71.93   |
| D1Pas1        | DNA segment, C                               | 1  | 1 | 0.03    | 0.04    | 0.04    | 0.02    | 0.03    | 30.19   | 312.05  | 184.59  | 0.11    |
| D630039A03Rik | RIKEN cDNA D630039A03Rik                     | 2  | 1 | 816.85  | 0.04    | 19.27   | 1441.10 | 474.88  | 414.96  | 0.02    | 0.02    | 0.11    |
| Dab2          | disabled homolog 2                           | 1  | 1 | 98.91   | 24.37   | 0.04    | 73.77   | 125.54  | 359.54  | 21.30   | 24.20   | 0.11    |
| Dad1          | defender against virus 1                     | 2  | 1 | 50.72   | 7.91    | 102.62  | 12.06   | 168.46  | 171.40  | 28.49   | 4.18    | 1465.37 |
| Dars          | aspartyl-tRNA synthetase                     | 6  | 1 | 1.07    | 0.04    | 32.62   | 0.02    | 1.20    | 0.02    | 0.02    | 0.02    | 0.11    |
| Dbt           | dihydrolipoamide acyltransferase             | 11 | 1 | 5.39    | 322.11  | 46.03   | 214.87  | 1.94    | 0.40    | 28.32   | 30.02   | 0.92    |
| Dci           | dodecenoyl-CoA oxidase                       | 39 | 2 | 675.04  | 73.43   | 138.11  | 325.02  | 82.32   | 138.08  | 779.48  | 885.44  | 59.58   |
| Dcp1b         | DCP1 decapping 1b                            | 1  | 1 | 1707.63 | 114.35  | 2990.70 | 40.68   | 286.88  | 1287.71 | 7.67    | 0.02    | 61.97   |
| Ddb1          | damage specific endonuclease 1               | 9  | 1 | 0.03    | 0.04    | 0.04    | 321.05  | 0.03    | 167.94  | 241.44  | 22.18   | 0.11    |
| Ddhd1         | DDHD domain containing 1                     | 2  | 2 | 11.03   | 3.00    | 0.04    | 219.11  | 20.24   | 210.55  | 95.20   | 158.34  | 905.04  |
| Ddost         | dolichyl-di-phosphate synthase               | 12 | 3 | 828.03  | 1514.37 | 168.23  | 441.74  | 656.39  | 472.63  | 241.96  | 293.88  | 3722.98 |
| Ddx17         | DEAD (Asp-Glu) domain containing 17          | 1  | 1 | 433.07  | 944.23  | 155.25  | 622.50  | 80.15   | 12.14   | 3.29    | 0.02    | 7.96    |
| Ddx20         | DEAD (Asp-Glu) domain containing 20          | 1  | 1 | 3.33    | 9.64    | 10.68   | 13.68   | 12.02   | 38.20   | 16.74   | 49.29   | 189.14  |
| Ddx21         | DEAD (Asp-Glu) domain containing 21          | 47 | 5 | 1342.86 | 661.78  | 34.00   | 671.07  | 326.68  | 233.69  | 1030.52 | 975.86  | 406.95  |
| Ddx39         | DEAD (Asp-Glu) domain containing 39          | 2  | 1 | 0.03    | 0.04    | 0.04    | 0.02    | 20.82   | 16.21   | 0.02    | 0.02    | 0.11    |
| Ddx3y         | DEAD (Asp-Glu) domain containing 3y          | 61 | 5 | 455.11  | 374.23  | 898.17  | 321.91  | 1739.01 | 1535.54 | 488.22  | 658.22  | 62.77   |
| Ddx5          | DEAD (Asp-Glu) domain containing 5           | 16 | 6 | 1469.20 | 530.73  | 418.44  | 224.21  | 1523.58 | 1124.87 | 1103.35 | 1122.75 | 1171.40 |
| Dek           | DEK oncogene (avian sarcoma)                 | 1  | 1 | 1253.60 | 154.15  | 0.04    | 141.58  | 987.51  | 972.30  | 463.23  | 364.12  | 1087.48 |

|         |                   |     |    |         |         |         |          |          |          |          |         |          |
|---------|-------------------|-----|----|---------|---------|---------|----------|----------|----------|----------|---------|----------|
| Der1    | Der1-like domair  | 21  | 1  | 26.06   | 41.27   | 55.23   | 0.02     | 124.70   | 94.48    | 0.02     | 11.37   | 825.69   |
| Det1    | de-etiolated hom  | 3   | 3  | 0.03    | 328.62  | 934.49  | 0.02     | 0.03     | 0.02     | 0.02     | 0.02    | 0.11     |
| Dhx15   | DEAH (Asp-Glu-    | 15  | 1  | 254.38  | 418.49  | 0.04    | 389.47   | 0.03     | 13.73    | 204.54   | 226.90  | 5.50     |
| Dhx9    | DEAH (Asp-Glu-    | 39  | 8  | 1678.77 | 65.59   | 359.01  | 46.05    | 1115.81  | 857.53   | 919.05   | 914.67  | 198.62   |
| Dkc1    | dyskeratosis con  | 35  | 2  | 156.98  | 41.38   | 0.04    | 49.04    | 413.13   | 384.86   | 114.46   | 115.81  | 0.11     |
| Dlat    | dihydrolipoamide  | 137 | 7  | 2146.93 | 374.62  | 160.28  | 528.30   | 1969.72  | 2108.61  | 2418.11  | 2344.36 | 776.03   |
| Dld     | dihydrolipoamide  | 67  | 6  | 1622.57 | 3278.23 | 368.64  | 265.76   | 1490.43  | 1428.06  | 2337.82  | 2522.57 | 286.58   |
| Dlec1   | deleted in lung a | 104 | 4  | 356.37  | 134.40  | 79.92   | 0.02     | 965.23   | 733.78   | 1133.15  | 1317.07 | 646.88   |
| Dlgap1  | discs, large (Dro | 2   | 2  | 98.58   | 89.40   | 34.88   | 578.29   | 326.57   | 492.36   | 1436.09  | 3822.35 | 29996.31 |
| Dlst    | dihydrolipoamide  | 42  | 4  | 2822.96 | 1282.88 | 126.72  | 176.57   | 370.43   | 487.18   | 2484.80  | 2702.87 | 2399.21  |
| Dnahc7a | dynein, axonema   | 1   | 1  | 4.95    | 0.04    | 0.04    | 0.02     | 73.04    | 0.02     | 12.81    | 18.25   | 6.29     |
| Dnaja1  | DnaJ (Hsp40) hc   | 4   | 1  | 39.77   | 20.80   | 0.04    | 41.86    | 1524.74  | 1383.70  | 209.14   | 202.97  | 0.11     |
| Dnaja2  | DnaJ (Hsp40) hc   | 3   | 1  | 415.91  | 0.04    | 0.04    | 0.02     | 0.03     | 0.02     | 428.34   | 507.86  | 0.11     |
| Dnaja3  | DnaJ (Hsp40) hc   | 3   | 2  | 0.03    | 0.04    | 104.83  | 1.74     | 13.82    | 14.58    | 1.07     | 3.41    | 647.47   |
| Dnajb11 | DnaJ (Hsp40) hc   | 21  | 3  | 170.64  | 86.94   | 284.39  | 417.68   | 680.12   | 544.26   | 281.18   | 268.08  | 343.46   |
| Dnm2    | dynamain 2 Gene   | 23  | 4  | 19.12   | 30.03   | 1497.10 | 44.87    | 91.24    | 328.12   | 811.71   | 754.11  | 18.59    |
| Doc2b   | double C2, beta   | 4   | 4  | 187.04  | 67.22   | 0.04    | 571.35   | 346.89   | 498.96   | 546.25   | 708.65  | 46.29    |
| Dpy30   | dpy-30 homolog    | 4   | 1  | 1.64    | 0.04    | 0.04    | 7.86     | 0.03     | 1.83     | 0.02     | 0.02    | 0.11     |
| Dpysl2  | dihydropyrimidin  | 17  | 3  | 717.02  | 556.20  | 90.69   | 314.64   | 220.62   | 87.58    | 320.74   | 174.99  | 41.40    |
| Drg2    | developmentally   | 1   | 1  | 110.30  | 1702.65 | 0.04    | 0.02     | 195.52   | 0.02     | 0.02     | 0.02    | 0.11     |
| Dync1h1 | dynein cytoplasn  | 204 | 29 | 3165.00 | 3437.49 | 3746.58 | 3710.40  | 4899.17  | 3667.85  | 4823.54  | 4148.54 | 6128.94  |
| Dync1i2 | dynein cytoplasn  | 2   | 1  | 0.03    | 0.04    | 1.32    | 1.51     | 0.03     | 0.02     | 0.02     | 0.02    | 0.11     |
| Eef1a1  | eukaryotic transl | 304 | 13 | 8703.80 | 6305.06 | 4220.27 | 16344.98 | 10364.23 | 19994.34 | 11608.32 | 9779.49 | 5576.04  |
| Eef1b2  | eukaryotic transl | 85  | 3  | 772.21  | 1093.87 | 1641.37 | 436.66   | 6712.75  | 5342.46  | 917.53   | 1128.28 | 549.02   |
| Eef1d   | eukaryotic transl | 52  | 3  | 224.15  | 95.31   | 112.04  | 53.56    | 2282.71  | 1675.11  | 363.10   | 502.42  | 574.98   |
| Eef1g   | eukaryotic transl | 31  | 4  | 420.91  | 269.11  | 185.60  | 381.43   | 284.67   | 339.88   | 699.56   | 879.93  | 137.55   |
| Eef2    | eukaryotic transl | 93  | 6  | 2921.11 | 2368.22 | 2360.16 | 2124.91  | 2863.35  | 3358.68  | 3529.46  | 3595.34 | 923.44   |
| Efcab3  | EF-hand calciur   | 1   | 1  | 0.03    | 0.04    | 0.04    | 0.02     | 0.03     | 0.02     | 0.02     | 0.02    | 0.11     |
| Efemp2  | epidermal growth  | 12  | 4  | 867.97  | 1095.09 | 4586.97 | 904.47   | 332.70   | 198.63   | 125.72   | 82.73   | 292.10   |
| Efhd1   | EF hand domain    | 8   | 1  | 191.40  | 98.15   | 0.04    | 0.02     | 14.93    | 0.02     | 20.43    | 13.86   | 0.11     |
| Efhd2   | EF hand domain    | 4   | 3  | 145.22  | 50.86   | 0.04    | 81.09    | 137.76   | 26.20    | 30.54    | 4.67    | 447.89   |
| Eftud2  | elongation factor | 24  | 3  | 181.83  | 61.27   | 87.40   | 25.47    | 137.04   | 344.85   | 137.91   | 76.11   | 165.15   |
| Ehd1    | EH-domain cont    | 5   | 4  | 597.22  | 483.04  | 1583.38 | 916.12   | 15.51    | 74.41    | 429.27   | 512.43  | 1016.61  |
| Ehd4    | EH-domain cont    | 3   | 3  | 37.07   | 242.34  | 103.41  | 358.46   | 129.54   | 91.55    | 41.09    | 62.43   | 5147.06  |
| Eif1    | eukaryotic transl | 1   | 1  | 19.69   | 0.04    | 101.75  | 0.02     | 0.03     | 0.02     | 33.77    | 71.08   | 0.11     |
| Eif2s1  | eukaryotic transl | 27  | 2  | 306.75  | 28.71   | 1234.59 | 13.14    | 10.91    | 0.02     | 451.70   | 534.43  | 0.11     |
| Eif2s2  | eukaryotic transl | 1   | 1  | 0.03    | 0.04    | 0.04    | 0.02     | 1.38     | 0.02     | 0.02     | 0.02    | 3.13     |

|          |                    |     |    |         |         |          |          |         |         |         |         |         |
|----------|--------------------|-----|----|---------|---------|----------|----------|---------|---------|---------|---------|---------|
| Eif3a    | eukaryotic transl  | 28  | 4  | 153.68  | 487.44  | 279.23   | 896.99   | 202.83  | 101.65  | 485.60  | 342.41  | 12.10   |
| Eif3f    | eukaryotic transl  | 1   | 1  | 35.78   | 0.04    | 0.04     | 285.93   | 1.16    | 0.02    | 0.02    | 0.02    | 106.59  |
| Eif3g    | eukaryotic transl  | 6   | 1  | 0.03    | 89.18   | 0.04     | 0.02     | 10.20   | 0.02    | 0.02    | 6.92    | 4.67    |
| Eif4a1   | eukaryotic transl  | 197 | 10 | 3805.16 | 2652.14 | 713.44   | 2214.71  | 3672.32 | 5781.13 | 6713.21 | 4728.34 | 2554.11 |
| Eif4a2   | eukaryotic transl  | 1   | 1  | 20.76   | 0.04    | 0.04     | 0.02     | 22.88   | 26.09   | 0.02    | 0.02    | 595.01  |
| Eif4a3   | eukaryotic transl  | 34  | 3  | 376.88  | 443.81  | 665.36   | 57.59    | 838.26  | 562.10  | 418.97  | 684.52  | 1010.13 |
| Eif4g2   | eukaryotic transl  | 2   | 1  | 407.47  | 81.25   | 0.04     | 4.48     | 22.70   | 8.38    | 120.36  | 117.09  | 20.75   |
| Eif4h    | eukaryotic transl  | 1   | 1  | 0.03    | 866.48  | 525.33   | 567.14   | 53.69   | 71.49   | 90.80   | 174.90  | 12.14   |
| Eif5     | eukaryotic transl  | 6   | 1  | 18.08   | 38.17   | 486.40   | 7.02     | 17.73   | 14.98   | 10.29   | 31.25   | 5.03    |
| Eif5a    | eukaryotic transl  | 25  | 5  | 1007.72 | 1021.13 | 1285.25  | 1716.15  | 243.68  | 36.77   | 428.33  | 226.00  | 23.12   |
| Elmo1    | engulfment and c   | 12  | 3  | 286.99  | 1113.62 | 1105.37  | 288.73   | 390.65  | 280.25  | 324.89  | 168.51  | 525.79  |
| Elmod2   | ELMO domain c      | 3   | 2  | 17.51   | 15.95   | 0.04     | 0.02     | 234.10  | 240.29  | 7.77    | 6.98    | 186.85  |
| Elp2     | elongation protei  | 4   | 2  | 0.03    | 0.04    | 0.04     | 0.02     | 0.03    | 0.02    | 0.02    | 0.02    | 0.11    |
| Enc1     | ectodermal-neur    | 440 | 8  | 246.02  | 347.64  | 1594.60  | 459.63   | 688.82  | 817.43  | 185.30  | 209.64  | 4435.48 |
| Eno1     | enolase 1, alpha   | 487 | 16 | 3725.71 | 3916.14 | 15594.74 | 10313.63 | 1425.22 | 1801.58 | 2333.65 | 2228.55 | 1076.77 |
| Eno3     | enolase 3, beta r  | 1   | 1  | 5.63    | 26.25   | 0.04     | 12.17    | 4.41    | 4.82    | 5.48    | 0.02    | 0.11    |
| Eprs     | glutamyl-prolyl-tf | 15  | 8  | 8.95    | 0.04    | 104.74   | 48.96    | 153.17  | 214.01  | 661.74  | 1078.09 | 2191.14 |
| Eps8     | epidermal growth   | 4   | 1  | 201.14  | 253.53  | 238.81   | 89.69    | 29.09   | 96.56   | 0.02    | 0.02    | 0.11    |
| Erap1    | endoplasmic reti   | 3   | 2  | 0.03    | 0.04    | 0.04     | 585.90   | 0.03    | 0.02    | 0.02    | 0.02    | 0.11    |
| Ero1l    | ERO1-like (S. ce   | 3   | 1  | 0.03    | 29.50   | 28.64    | 3.11     | 283.00  | 217.40  | 15.18   | 13.35   | 0.11    |
| Erp29    | endoplasmic reti   | 119 | 5  | 455.28  | 209.98  | 103.85   | 384.90   | 3606.66 | 3648.10 | 875.49  | 839.96  | 3270.13 |
| Esd      | esterase D/formy   | 41  | 5  | 136.65  | 113.45  | 1910.80  | 2057.35  | 50.44   | 21.29   | 531.56  | 109.12  | 56.01   |
| Esyt1    | extended synapt    | 90  | 9  | 1161.85 | 862.50  | 222.98   | 1542.58  | 765.92  | 878.44  | 882.10  | 987.78  | 1000.53 |
| Etf1     | eukaryotic transl  | 1   | 1  | 0.03    | 0.04    | 0.04     | 753.17   | 22.42   | 0.02    | 0.02    | 0.02    | 0.11    |
| Etfa     | electron transfer  | 142 | 7  | 1541.11 | 2248.49 | 2302.68  | 2457.96  | 3886.55 | 3609.61 | 2737.83 | 2852.71 | 365.40  |
| Etfb     | electron transfer  | 19  | 2  | 383.59  | 64.41   | 22.76    | 56.44    | 56.05   | 20.48   | 1166.34 | 1659.58 | 329.31  |
| Ewsr1    | Ewing sarcoma t    | 2   | 1  | 5.81    | 0.04    | 0.04     | 22.22    | 0.03    | 0.02    | 0.02    | 0.14    | 0.11    |
| Ezr      | ezrin Gene         | 8   | 1  | 104.66  | 25.42   | 102.07   | 30.65    | 381.45  | 303.19  | 64.74   | 89.98   | 17.08   |
| F2rl1    | coagulation factc  | 39  | 1  | 161.52  | 171.09  | 97.28    | 64.36    | 149.84  | 89.76   | 28.69   | 22.14   | 386.31  |
| Fam119a  | family with sequ   | 3   | 3  | 22.34   | 363.74  | 123.43   | 0.02     | 0.03    | 0.02    | 0.02    | 0.02    | 0.11    |
| Fam129a  | family with sequ   | 28  | 3  | 105.00  | 151.29  | 679.03   | 775.93   | 61.37   | 99.31   | 140.38  | 67.21   | 32.15   |
| Fam160a1 | family with sequ   | 7   | 5  | 6.49    | 741.12  | 1762.02  | 2787.17  | 1.76    | 0.66    | 2.41    | 1.08    | 0.11    |
| Fam162a  | family with sequ   | 2   | 1  | 364.14  | 0.04    | 7.60     | 125.90   | 0.03    | 0.02    | 382.63  | 348.41  | 0.11    |
| Fam184b  | family with sequ   | 1   | 1  | 26.74   | 15.81   | 46.71    | 0.02     | 25.21   | 101.14  | 14.88   | 0.02    | 0.11    |
| Fam49b   | family with sequ   | 65  | 6  | 1124.16 | 5189.69 | 3803.84  | 9280.55  | 719.08  | 740.81  | 398.86  | 274.03  | 214.54  |
| Fam83b   | family with sequ   | 6   | 4  | 1857.31 | 716.04  | 278.73   | 19.55    | 1154.64 | 42.56   | 151.57  | 228.33  | 52.89   |
| Fau      | Finkel-Biskis-Rei  | 13  | 1  | 0.03    | 0.04    | 0.04     | 0.02     | 0.03    | 0.02    | 0.02    | 0.02    | 46.09   |

|         |                      |     |    |         |         |         |         |         |         |         |         |         |
|---------|----------------------|-----|----|---------|---------|---------|---------|---------|---------|---------|---------|---------|
| Fbl     | fibrillar Gene       | 75  | 6  | 3242.24 | 179.78  | 1939.05 | 354.70  | 1965.71 | 1432.19 | 1452.32 | 1722.03 | 271.14  |
| Fdps    | farnesyl diphosp     | 3   | 1  | 98.53   | 115.66  | 868.51  | 69.95   | 89.03   | 67.87   | 56.30   | 61.70   | 68.38   |
| Fermt3  | fermitin family hc   | 36  | 5  | 455.58  | 342.81  | 4235.10 | 152.57  | 696.98  | 1333.37 | 75.83   | 244.80  | 613.48  |
| Fezf1   | Fez family zinc fi   | 1   | 1  | 22.20   | 283.42  | 444.85  | 0.02    | 0.03    | 0.02    | 0.02    | 0.02    | 0.11    |
| Fgb     | fibrinogen beta c    | 1   | 1  | 7.08    | 0.04    | 5.59    | 62.27   | 8.16    | 56.38   | 21.29   | 42.00   | 248.79  |
| Fh1     | fumarate hydrata     | 66  | 7  | 552.44  | 1505.06 | 1608.43 | 2160.19 | 871.86  | 814.24  | 544.62  | 508.22  | 23.42   |
| Fis1    | fission 1 (mitoch    | 4   | 1  | 0.03    | 0.04    | 9.40    | 0.02    | 16.67   | 39.28   | 4.93    | 9.43    | 383.36  |
| Fkbp1a  | FK506 binding p      | 8   | 1  | 516.89  | 0.04    | 52.75   | 1923.19 | 589.09  | 256.41  | 5.20    | 0.02    | 5.03    |
| Fkbp2   | FK506 binding p      | 23  | 3  | 894.11  | 364.85  | 0.04    | 33.87   | 518.76  | 321.06  | 404.21  | 403.97  | 7780.78 |
| Flna    | filamin, alpha Ge    | 75  | 11 | 2949.04 | 3399.77 | 2857.26 | 4363.98 | 3544.26 | 2999.45 | 856.67  | 773.45  | 2518.66 |
| Fmnl1   | formin-like 1 Ger    | 10  | 5  | 222.45  | 71.49   | 2978.40 | 252.15  | 314.96  | 233.97  | 311.91  | 286.86  | 3013.13 |
| Fth1    | ferritin heavy cha   | 12  | 1  | 0.03    | 0.04    | 0.04    | 15.77   | 408.63  | 273.42  | 0.02    | 0.02    | 19.06   |
| Ftl1    | ferritin light chair | 25  | 4  | 187.81  | 127.43  | 0.04    | 1033.76 | 46.50   | 85.22   | 462.03  | 250.13  | 225.92  |
| G6pdx   | glucose-6-phosp      | 10  | 2  | 17.79   | 246.54  | 343.43  | 1520.63 | 48.43   | 65.17   | 3.04    | 6.96    | 36.64   |
| Galc    | galactosylcerami     | 3   | 3  | 0.03    | 0.04    | 0.04    | 95.18   | 0.03    | 0.02    | 0.02    | 19.76   | 47.58   |
| Ganab   | alpha glucosidas     | 12  | 6  | 563.61  | 511.31  | 3696.30 | 1386.61 | 1675.27 | 1871.80 | 1145.99 | 965.70  | 2040.85 |
| Gapdh   | glyceraldehyde-3     | 13  | 10 | 2867.29 | 7.34    | 308.05  | 7.92    | 2838.76 | 1757.93 | 3.40    | 6.10    | 3175.93 |
| Gars    | glycyl-tRNA synt     | 30  | 2  | 1111.21 | 591.82  | 61.91   | 505.11  | 591.80  | 663.27  | 1446.43 | 1490.31 | 88.01   |
| Gatad2b | GATA zinc finger     | 2   | 1  | 1044.66 | 9.00    | 12.87   | 273.56  | 220.07  | 99.37   | 0.02    | 0.02    | 0.11    |
| Gcn1l1  | GCN1 general ca      | 34  | 4  | 3342.37 | 2685.46 | 8521.55 | 2448.27 | 6079.79 | 5277.21 | 1955.26 | 1845.62 | 656.00  |
| Gdi1    | guanosine dipho      | 1   | 1  | 0.98    | 24.80   | 0.04    | 4.24    | 2.15    | 3.17    | 0.02    | 0.02    | 101.90  |
| Gdi2    | guanosine dipho      | 61  | 6  | 326.46  | 586.94  | 265.00  | 2009.76 | 784.84  | 780.57  | 466.86  | 424.86  | 120.93  |
| Gfm1    | G elongation fac     | 7   | 2  | 10.01   | 30.48   | 0.04    | 8.27    | 60.38   | 24.93   | 43.57   | 34.96   | 164.66  |
| Gga2    | golgi associated,    | 1   | 1  | 17.40   | 125.67  | 0.04    | 0.02    | 13.71   | 6.30    | 0.02    | 6.21    | 0.11    |
| Gja5    | gap junction prot    | 1   | 1  | 1.68    | 0.04    | 12.89   | 0.02    | 0.03    | 76.74   | 203.13  | 126.65  | 998.77  |
| Glrx    | glutaredoxin Ger     | 2   | 1  | 1237.05 | 24.26   | 15.65   | 0.02    | 85.99   | 74.80   | 53.52   | 72.42   | 0.11    |
| Glrx3   | glutaredoxin 3 G     | 11  | 1  | 0.03    | 327.70  | 613.25  | 677.03  | 0.03    | 0.02    | 3.75    | 0.02    | 0.11    |
| Glrx5   | glutaredoxin 5 hc    | 10  | 2  | 932.33  | 1131.76 | 24.36   | 368.40  | 580.57  | 1015.32 | 1042.29 | 225.18  | 611.71  |
| Gls     | glutaminase Ger      | 27  | 6  | 324.76  | 522.06  | 0.12    | 309.27  | 849.23  | 885.40  | 370.39  | 297.78  | 617.47  |
| Glt25d1 | glycosyltransfera    | 14  | 5  | 829.37  | 188.70  | 72.33   | 332.05  | 1053.21 | 1212.91 | 1138.40 | 953.43  | 884.05  |
| Glud1   | glutamate dehyd      | 233 | 18 | 1356.09 | 2392.33 | 1947.42 | 892.00  | 5375.88 | 6593.04 | 4502.85 | 3936.89 | 5015.67 |
| Gm4802  | predicted gene 4     | 2   | 2  | 16.71   | 15.76   | 32.57   | 0.02    | 26.54   | 2.53    | 6.67    | 8.76    | 48.70   |
| Gm5138  | predicted gene 5     | 2   | 2  | 57.72   | 44.32   | 41.15   | 7.70    | 1.63    | 26.10   | 27.20   | 6.79    | 389.30  |
| Gm6588  | predicted gene 6     | 2   | 2  | 1424.67 | 0.04    | 0.04    | 0.02    | 0.03    | 0.02    | 0.02    | 0.02    | 85.28   |
| Gm88    | predicted gene 8     | 6   | 3  | 97.64   | 263.01  | 24.24   | 0.02    | 10.74   | 0.02    | 7.09    | 0.02    | 0.11    |
| Gm8909  | predicted gene 8     | 4   | 2  | 360.65  | 198.17  | 81.64   | 0.02    | 116.37  | 67.24   | 71.45   | 39.56   | 342.29  |
| Gm973   | predicted gene 9     | 3   | 3  | 9.62    | 0.04    | 25.66   | 0.02    | 7.79    | 2.63    | 0.02    | 0.02    | 25.24   |

|         |                    |      |    |         |          |          |         |         |         |         |          |         |
|---------|--------------------|------|----|---------|----------|----------|---------|---------|---------|---------|----------|---------|
| Gnai2   | guanine nucleoti   | 98   | 4  | 4167.09 | 3340.39  | 668.38   | 2361.04 | 1819.25 | 2236.99 | 4798.37 | 4595.79  | 304.73  |
| Gnb2    | guanine nucleoti   | 10   | 1  | 144.27  | 149.19   | 186.61   | 0.02    | 83.99   | 113.49  | 31.37   | 132.44   | 21.22   |
| Gnb2l1  | guanine nucleoti   | 27   | 4  | 1212.34 | 832.93   | 689.15   | 390.23  | 1946.76 | 1614.48 | 1738.35 | 1627.27  | 944.60  |
| Gng2    | guanine nucleoti   | 12   | 1  | 3.73    | 0.04     | 74.65    | 21.97   | 231.57  | 213.52  | 30.86   | 18.54    | 71.63   |
| Gnmt    | glycine N-methyl   | 2    | 1  | 0.03    | 0.04     | 0.04     | 176.72  | 0.03    | 6.57    | 81.64   | 111.36   | 28.58   |
| Got2    | glutamate oxalo    | 144  | 7  | 2568.14 | 4683.00  | 39.96    | 448.47  | 5326.01 | 6346.83 | 9479.01 | 12432.26 | 46.95   |
| Gp49a   | glycoprotein 49 /  | 21   | 1  | 124.36  | 27.19    | 0.04     | 0.02    | 194.95  | 119.08  | 61.53   | 86.85    | 0.11    |
| Gpd2    | glycerol phosph    | 64   | 7  | 2093.57 | 2593.11  | 754.30   | 1804.86 | 405.40  | 468.95  | 1905.26 | 1972.36  | 295.82  |
| Gpi1    | glucose phosph     | 24   | 4  | 33.03   | 406.24   | 2821.68  | 557.49  | 96.13   | 29.24   | 91.61   | 59.95    | 121.80  |
| Gpr84   | G protein-couple   | 6    | 2  | 115.97  | 0.04     | 89.44    | 155.53  | 0.03    | 15.21   | 140.40  | 18.28    | 76.28   |
| Gpx1    | glutathione pero   | 8    | 2  | 5.38    | 0.04     | 0.04     | 4.83    | 38.59   | 0.02    | 0.02    | 44.12    | 21.60   |
| Grpel1  | GrpE-like 1, mitc  | 46   | 2  | 816.56  | 269.60   | 0.04     | 236.20  | 32.38   | 67.64   | 385.16  | 558.13   | 92.06   |
| Gsn     | gelsolin Gene      | 64   | 6  | 323.85  | 88.71    | 22.05    | 775.29  | 1059.63 | 1312.36 | 127.80  | 125.64   | 672.59  |
| Gsto1   | glutathione S-tra  | 10   | 2  | 7.09    | 13.52    | 0.04     | 0.02    | 43.21   | 47.16   | 0.02    | 2.06     | 0.11    |
| Gtdc1   | glycosyltransfer   | 22   | 6  | 1909.43 | 5692.28  | 278.70   | 1366.25 | 2995.29 | 2941.03 | 7395.43 | 7765.40  | 74.14   |
| Gucy1a2 | guanylate cyclas   | 37   | 19 | 485.49  | 733.12   | 1535.70  | 723.90  | 8.40    | 19.15   | 5.54    | 1.34     | 453.51  |
| Gusb    | glucuronidase, b   | 117  | 9  | 772.85  | 9500.66  | 1016.18  | 537.35  | 3871.58 | 5154.26 | 5921.29 | 5743.43  | 1737.40 |
| Gys2    | glycogen syntha    | 1    | 1  | 0.03    | 0.04     | 14.99    | 0.02    | 0.03    | 0.02    | 0.02    | 1.21     | 10.08   |
| H13     | histocompatibility | 50   | 2  | 192.15  | 163.10   | 0.04     | 0.02    | 678.59  | 442.45  | 128.06  | 190.81   | 523.27  |
| H2-Ab1  | histocompatibility | 17   | 2  | 123.82  | 0.04     | 109.99   | 10.64   | 1167.55 | 1237.85 | 334.53  | 338.82   | 0.11    |
| H2-Eb1  | histocompatibility | 7    | 1  | 48.82   | 25.97    | 33.17    | 61.97   | 254.80  | 120.75  | 217.06  | 219.82   | 0.11    |
| H2-K1   | histocompatibility | 9    | 5  | 18.64   | 13.23    | 46.21    | 22.76   | 108.72  | 5.68    | 4.53    | 6.90     | 90.04   |
| H2-L    | histocompatibility | 78   | 8  | 3249.98 | 1219.95  | 97.46    | 379.81  | 3146.02 | 4185.60 | 3309.12 | 3146.84  | 44.16   |
| H2-Q1   | histocompatibility | 19   | 2  | 80.24   | 0.04     | 61.21    | 10.06   | 213.48  | 205.11  | 496.11  | 559.18   | 0.11    |
| H2-T10  | histocompatibility | 2    | 2  | 41.47   | 91.41    | 0.04     | 8.81    | 27.41   | 48.59   | 25.43   | 41.24    | 164.58  |
| H2-T18  | histocompatibility | 1    | 1  | 0.03    | 0.04     | 0.04     | 0.02    | 0.03    | 0.02    | 0.02    | 0.02     | 0.11    |
| H2-gs10 | MHC class I like   | 3    | 1  | 2281.01 | 295.45   | 0.04     | 963.06  | 945.27  | 524.97  | 0.02    | 0.02     | 0.11    |
| H2afj   | H2A histone fam    | 1761 | 3  | 4173.91 | 6598.56  | 11161.98 | 7164.42 | 723.35  | 572.00  | 1857.09 | 1982.15  | 262.75  |
| H2afy   | H2A histone fam    | 41   | 4  | 3414.84 | 1367.64  | 119.49   | 490.23  | 1125.77 | 854.75  | 5136.89 | 5061.41  | 41.05   |
| Hadh    | hydroxyacyl-Coe    | 8    | 1  | 418.62  | 16170.65 | 6967.07  | 7540.64 | 0.03    | 0.02    | 328.12  | 284.77   | 79.40   |
| Hadha   | hydroxyacyl-Coe    | 34   | 8  | 879.53  | 1217.05  | 1321.00  | 984.17  | 1195.45 | 959.72  | 606.30  | 823.84   | 1734.40 |
| Hadhb   | hydroxyacyl-Coe    | 58   | 3  | 133.77  | 13.34    | 49.49    | 28.44   | 671.48  | 427.18  | 102.39  | 33.20    | 52.48   |
| Hat1    | histone aminotra   | 1    | 1  | 5.00    | 0.04     | 0.04     | 0.02    | 23.93   | 39.83   | 375.24  | 471.61   | 7.10    |
| Hbb-b1  | hemoglobin, bet    | 33   | 2  | 81.55   | 69.17    | 0.04     | 0.02    | 939.35  | 815.52  | 244.64  | 203.38   | 0.11    |
| Hck     | hemopoietic cell   | 5    | 1  | 139.13  | 186.57   | 2.63     | 0.02    | 152.39  | 161.66  | 990.74  | 378.28   | 2461.97 |
| Hcls1   | hematopoietic ce   | 15   | 4  | 158.97  | 71.15    | 730.00   | 190.31  | 130.92  | 107.33  | 121.20  | 89.22    | 1334.47 |
| Hdac1   | histone deacetyl   | 38   | 4  | 273.04  | 568.12   | 328.29   | 1025.32 | 206.63  | 580.08  | 63.59   | 91.29    | 2377.97 |

|           |                          |      |    |         |         |          |          |          |         |         |         |         |
|-----------|--------------------------|------|----|---------|---------|----------|----------|----------|---------|---------|---------|---------|
| Hdac2     | histone deacetylase      | 8    | 1  | 533.49  | 2137.44 | 110.67   | 66.91    | 221.06   | 341.31  | 3.81    | 0.02    | 0.11    |
| Hdlbp     | high density lipoprotein | 7    | 1  | 62.17   | 96.43   | 133.02   | 2.05     | 53.07    | 57.00   | 8.86    | 3.78    | 9.69    |
| Hebp1     | heme binding protein     | 3    | 1  | 4.78    | 0.04    | 2373.08  | 0.02     | 9.86     | 3.76    | 9.72    | 0.02    | 0.11    |
| Hexa      | hexosaminidase           | 3    | 3  | 179.80  | 103.18  | 123.73   | 0.02     | 415.56   | 549.66  | 282.99  | 291.74  | 108.00  |
| Hexb      | hexosaminidase           | 21   | 1  | 106.08  | 0.04    | 10.81    | 0.02     | 1134.84  | 892.21  | 90.85   | 51.81   | 82.96   |
| Hibadh    | 3-hydroxyisobutyrate     | 25   | 3  | 979.44  | 151.39  | 625.44   | 248.08   | 1355.91  | 859.18  | 42.40   | 15.88   | 169.33  |
| Hibch     | 3-hydroxyisobutyrate     | 2    | 1  | 0.03    | 0.04    | 0.04     | 0.02     | 0.03     | 0.02    | 0.02    | 0.02    | 509.92  |
| Hip1r     | huntingtin interaction   | 4    | 3  | 71.45   | 12.89   | 54.03    | 10.29    | 7.58     | 5.72    | 22.91   | 40.95   | 0.11    |
| Hist1h1a  | histone cluster 1        | 76   | 4  | 1555.87 | 1101.69 | 9.94     | 5.13     | 3319.45  | 2783.43 | 1490.07 | 1857.62 | 39.06   |
| Hist1h2ba | histone cluster 1        | 3    | 1  | 211.58  | 402.47  | 544.33   | 460.31   | 75.50    | 53.67   | 110.88  | 132.35  | 1.28    |
| Hist1h2bh | histone cluster 1        | 1173 | 6  | 3475.70 | 3561.15 | 16417.10 | 18497.43 | 2913.63  | 2761.35 | 2693.27 | 3356.32 | 108.68  |
| Hist1h2bp | histone cluster 1        | 2    | 1  | 0.03    | 0.04    | 0.04     | 268.96   | 0.03     | 0.02    | 0.02    | 6.43    | 0.11    |
| Hist1h4f  | histone cluster 1        | 3355 | 12 | 6973.40 | 7838.98 | 8080.77  | 2595.97  | 10975.67 | 8407.31 | 5114.90 | 5047.27 | 8341.96 |
| Hist2h2ab | histone cluster 2        | 9    | 2  | 0.03    | 0.04    | 1016.69  | 55.55    | 0.03     | 0.02    | 0.02    | 5.67    | 4.66    |
| Hist2h2bb | histone cluster 2        | 3    | 3  | 2.55    | 7.70    | 0.35     | 1.71     | 0.24     | 3.36    | 1.24    | 2.64    | 15.76   |
| Hist3h2ba | histone cluster 3        | 1    | 1  | 10.14   | 5.10    | 2.73     | 12.09    | 1.51     | 5.25    | 3.32    | 3.99    | 26.80   |
| Hk1       | hexokinase 1 Gene        | 5    | 4  | 1813.52 | 1641.80 | 1300.77  | 1439.58  | 1645.64  | 3064.54 | 219.51  | 150.29  | 4.58    |
| Hk2       | hexokinase 2 Gene        | 2    | 1  | 161.05  | 0.04    | 0.04     | 0.02     | 0.03     | 23.11   | 600.69  | 511.76  | 0.11    |
| Hmga1     | high mobility group      | 30   | 1  | 249.41  | 198.61  | 73.26    | 0.02     | 70.84    | 38.31   | 38.81   | 15.16   | 156.28  |
| Hmox2     | heme oxygenase 2         | 15   | 5  | 3033.49 | 2710.87 | 696.11   | 240.42   | 725.89   | 836.32  | 374.68  | 395.87  | 207.25  |
| Hnrnpa0   | heterogeneous r          | 4    | 1  | 928.55  | 384.77  | 15.96    | 41.52    | 56.91    | 107.82  | 972.93  | 944.55  | 0.11    |
| Hnrnpa1   | heterogeneous r          | 2    | 2  | 1040.94 | 196.83  | 5856.89  | 599.18   | 1124.18  | 400.78  | 6.32    | 31.58   | 519.54  |
| Hnrnpa2b1 | heterogeneous r          | 73   | 6  | 1487.91 | 1769.43 | 650.24   | 1581.42  | 4158.53  | 3996.31 | 2528.41 | 3021.07 | 4558.62 |
| Hnrnpab   | heterogeneous r          | 39   | 3  | 48.74   | 0.04    | 389.13   | 20.76    | 307.19   | 348.65  | 1167.98 | 859.50  | 0.11    |
| Hnrnpc    | heterogeneous r          | 25   | 3  | 1967.69 | 1160.56 | 302.42   | 2001.55  | 0.03     | 19.54   | 767.04  | 402.15  | 50.89   |
| Hnrnpd    | heterogeneous r          | 37   | 5  | 92.30   | 35.99   | 538.95   | 892.15   | 186.61   | 422.82  | 530.96  | 305.91  | 62.92   |
| Hnrnpf    | heterogeneous r          | 80   | 3  | 2655.91 | 1411.20 | 815.64   | 1346.01  | 264.95   | 365.95  | 2269.34 | 2526.07 | 164.23  |
| Hnrnph1   | heterogeneous r          | 21   | 1  | 793.66  | 43.37   | 343.73   | 0.02     | 0.03     | 0.02    | 797.41  | 846.59  | 0.11    |
| Hnrnph2   | heterogeneous r          | 2    | 1  | 0.03    | 13.76   | 69.34    | 608.23   | 0.03     | 0.02    | 10.57   | 11.91   | 0.11    |
| Hnrnpk    | heterogeneous r          | 37   | 5  | 316.47  | 4874.62 | 1054.94  | 6807.38  | 2.37     | 9.55    | 15.15   | 19.80   | 10.80   |
| Hnrnpl    | heterogeneous r          | 107  | 8  | 2031.05 | 2757.77 | 1010.58  | 1390.34  | 1716.08  | 1156.31 | 425.98  | 462.71  | 47.09   |
| Hnrnpm    | heterogeneous r          | 117  | 9  | 3435.11 | 3693.80 | 2041.16  | 4110.26  | 4017.91  | 4630.71 | 1044.34 | 827.28  | 1393.39 |
| Hnrnpr    | heterogeneous r          | 3    | 1  | 33.00   | 0.04    | 70.64    | 28.87    | 322.62   | 212.74  | 4.70    | 9.60    | 0.11    |
| Hnrnpu    | heterogeneous r          | 97   | 5  | 2125.42 | 1054.86 | 208.37   | 1919.44  | 1301.08  | 1561.69 | 2291.40 | 2358.91 | 2226.44 |
| Hnrnpul2  | heterogeneous r          | 1    | 1  | 0.03    | 5192.02 | 4133.06  | 2444.83  | 0.03     | 0.02    | 0.02    | 0.02    | 0.11    |
| Hoxc8     | homeobox C8 Gene         | 5    | 5  | 11.68   | 0.04    | 49.02    | 221.15   | 0.87     | 9.28    | 9.43    | 12.07   | 27.01   |
| Hp1bp3    | heterochromatin          | 14   | 2  | 634.73  | 480.90  | 1551.80  | 882.62   | 1297.50  | 1005.23 | 458.37  | 431.55  | 3452.47 |

|          |                           |      |    |          |          |          |          |          |          |          |          |          |
|----------|---------------------------|------|----|----------|----------|----------|----------|----------|----------|----------|----------|----------|
| Hpgds    | hematopoietic pr          | 8    | 1  | 1200.15  | 113.29   | 119.46   | 0.02     | 323.72   | 215.65   | 7.76     | 0.02     | 0.11     |
| Hrasls5  | HRAS-like suppr           | 4    | 1  | 0.03     | 4.81     | 18.81    | 0.02     | 0.03     | 4.73     | 372.88   | 447.48   | 117.65   |
| Hsd17b10 | hydroxysteroid (‘         | 35   | 5  | 699.45   | 582.94   | 232.77   | 1349.76  | 153.44   | 267.36   | 819.39   | 954.54   | 1553.05  |
| Hsd17b11 | hydroxysteroid (‘         | 1    | 1  | 0.15     | 0.04     | 0.04     | 232.65   | 0.03     | 0.02     | 3.14     | 0.02     | 23.77    |
| Hsd17b12 | hydroxysteroid (‘         | 29   | 3  | 1994.78  | 2253.82  | 260.76   | 630.77   | 52.93    | 33.67    | 510.42   | 636.62   | 13.85    |
| Hsd3b2   | hydroxy-delta-5- $\alpha$ | 9    | 3  | 491.14   | 177.15   | 188.16   | 2.66     | 374.95   | 76.55    | 28.86    | 0.65     | 2.37     |
| Hsf1     | heat shock facto          | 2    | 1  | 0.03     | 0.04     | 0.04     | 14.78    | 0.03     | 0.02     | 5.22     | 0.02     | 962.96   |
| Hsp90aa1 | heat shock prote          | 89   | 10 | 97.18    | 138.56   | 253.93   | 3282.23  | 331.37   | 684.49   | 2920.33  | 3094.15  | 1103.67  |
| Hsp90ab1 | heat shock prote          | 494  | 21 | 13563.08 | 18619.06 | 8451.87  | 13415.13 | 18856.03 | 22823.69 | 25584.20 | 23119.96 | 30746.23 |
| Hsp90b1  | heat shock prote          | 532  | 29 | 10556.46 | 6791.18  | 7602.05  | 12868.32 | 11405.50 | 12905.31 | 14722.04 | 15350.89 | 4055.01  |
| Hspa1a   | heat shock prote          | 1    | 1  | 104.93   | 182.33   | 52.50    | 0.02     | 69.54    | 26.27    | 1.49     | 0.47     | 0.11     |
| Hspa4    | heat shock prote          | 19   | 6  | 169.74   | 143.91   | 270.89   | 1179.10  | 104.69   | 123.97   | 75.56    | 127.76   | 651.30   |
| Hspa5    | heat shock prote          | 2840 | 41 | 6049.95  | 5776.73  | 10691.34 | 10692.45 | 15294.85 | 16106.59 | 21691.82 | 26022.02 | 19954.28 |
| Hspa8    | heat shock prote          | 629  | 22 | 15677.39 | 15690.16 | 7614.45  | 9453.54  | 29482.81 | 28149.68 | 19813.64 | 20025.51 | 35039.23 |
| Hspa9    | heat shock prote          | 1011 | 25 | 12755.61 | 9940.00  | 15812.15 | 6414.47  | 19475.15 | 18501.88 | 11781.43 | 11584.61 | 13206.74 |
| Hspd1    | heat shock prote          | 504  | 24 | 7487.23  | 5460.59  | 6701.30  | 3223.74  | 12740.73 | 20320.69 | 11268.08 | 6475.91  | 6587.98  |
| Hspe1    | heat shock prote          | 179  | 5  | 1433.05  | 641.33   | 398.46   | 255.24   | 6839.28  | 6088.66  | 2151.33  | 2436.64  | 1145.93  |
| Hyou1    | hypoxia up-regul          | 102  | 12 | 318.57   | 337.34   | 5342.98  | 6531.20  | 586.90   | 1676.09  | 657.23   | 512.45   | 1314.01  |
| Iars2    | isoleucine-tRNA           | 4    | 3  | 997.95   | 595.57   | 0.59     | 0.82     | 639.34   | 596.42   | 1654.81  | 1472.33  | 0.11     |
| Idh2     | isocitrate dehydr         | 88   | 10 | 473.92   | 447.92   | 40.16    | 107.00   | 1592.61  | 1581.75  | 732.87   | 1108.40  | 1100.02  |
| Idh3a    | isocitrate dehydr         | 83   | 5  | 1375.64  | 561.84   | 69.23    | 136.60   | 2321.25  | 2016.08  | 1599.54  | 1660.00  | 100.63   |
| Idh3b    | isocitrate dehydr         | 53   | 6  | 1591.87  | 1167.43  | 20.94    | 565.23   | 213.26   | 44.52    | 1637.27  | 1553.06  | 585.31   |
| Idh3g    | isocitrate dehydr         | 6    | 1  | 262.78   | 0.04     | 53.18    | 0.02     | 0.03     | 0.02     | 438.52   | 663.22   | 0.11     |
| lfi203   | interferon activat        | 5    | 2  | 598.41   | 263.94   | 447.04   | 75.88    | 584.02   | 417.04   | 59.32    | 45.62    | 42.87    |
| lfi204   | interferon activat        | 9    | 2  | 71.33    | 312.67   | 0.04     | 0.02     | 25.95    | 14.92    | 10.01    | 0.02     | 28.17    |
| lfi44    | interferon-induce         | 2    | 1  | 0.03     | 0.04     | 0.04     | 0.02     | 0.03     | 0.02     | 0.02     | 0.02     | 0.11     |
| lfit1    | interferon-induce         | 3    | 2  | 347.79   | 1001.29  | 1162.56  | 358.19   | 340.77   | 286.42   | 191.72   | 228.91   | 1972.04  |
| lfitm3   | interferon induce         | 2    | 1  | 0.03     | 0.04     | 2.90     | 0.02     | 0.03     | 0.02     | 0.02     | 0.02     | 0.11     |
| ll4i1    | interleukin 4 indu        | 1    | 1  | 0.03     | 0.04     | 178.07   | 137.58   | 1.56     | 1.95     | 0.02     | 0.02     | 3.45     |
| lmmt     | inner membrane            | 90   | 13 | 420.79   | 2325.15  | 422.16   | 927.98   | 2142.30  | 2064.42  | 443.08   | 640.38   | 1647.85  |
| lno80d   | INO80 complex             | 1    | 1  | 18.30    | 0.04     | 0.04     | 111.60   | 9.95     | 0.02     | 6.47     | 0.02     | 135.26   |
| lnpp4a   | inositol polyphos         | 6    | 1  | 558.32   | 39.84    | 0.04     | 2908.62  | 390.69   | 71.30    | 0.02     | 0.02     | 0.11     |
| lnpp5d   | inositol polyphos         | 11   | 4  | 46.58    | 67.35    | 502.67   | 788.13   | 82.56    | 94.77    | 126.66   | 272.08   | 732.31   |
| lpo5     | importin 5 Gene           | 2    | 1  | 188.68   | 34.52    | 14.76    | 0.02     | 25.66    | 38.87    | 118.71   | 172.71   | 6.01     |
| lqgap1   | IQ motif containi         | 224  | 24 | 3637.66  | 1899.56  | 2438.37  | 2163.97  | 2080.45  | 1375.22  | 2013.14  | 2869.12  | 6390.58  |
| lrg1     | immunoresponsi            | 81   | 12 | 5482.93  | 5686.83  | 6291.86  | 1168.17  | 2142.02  | 2213.04  | 4076.07  | 3967.88  | 4591.97  |
| lsg15    | ISG15 ubiquitin-l         | 4    | 1  | 389.94   | 22.43    | 0.04     | 0.02     | 0.03     | 0.02     | 289.49   | 272.06   | 1.09     |

|         |                      |     |    |         |         |         |          |         |         |         |         |          |
|---------|----------------------|-----|----|---------|---------|---------|----------|---------|---------|---------|---------|----------|
| Itgam   | integrin alpha M     | 64  | 8  | 3200.98 | 1963.28 | 375.02  | 948.99   | 2152.16 | 457.27  | 1284.29 | 1628.77 | 956.60   |
| Itgb1   | integrin beta 1 (fi  | 3   | 3  | 83.64   | 3994.15 | 30.08   | 1135.46  | 4.20    | 41.11   | 13.17   | 16.86   | 192.14   |
| Itgb2   | integrin beta 2 G    | 81  | 5  | 787.64  | 1001.67 | 1755.18 | 2132.15  | 1086.54 | 905.29  | 1322.09 | 1611.83 | 0.89     |
| Itpr2   | inositol 1,4,5-trip  | 50  | 20 | 335.73  | 581.43  | 1224.97 | 622.20   | 17.16   | 15.23   | 2.50    | 0.32    | 364.75   |
| Itsn1   | intersectin 1 (SH    | 1   | 1  | 38.49   | 73.02   | 0.04    | 0.02     | 8.45    | 22.69   | 13.38   | 10.18   | 0.11     |
| Jph3    | junctionophilin 3 Ge | 1   | 1  | 0.03    | 0.04    | 0.04    | 0.02     | 0.03    | 0.02    | 0.02    | 0.02    | 6.61     |
| Kars    | lysyl-tRNA synth     | 1   | 1  | 88.00   | 40.89   | 0.04    | 1.96     | 63.91   | 1.38    | 574.64  | 507.20  | 48.95    |
| Kcnh5   | potassium voltaç     | 1   | 1  | 0.03    | 0.04    | 0.04    | 0.02     | 0.03    | 5.37    | 0.02    | 0.02    | 0.11     |
| Kcnk10  | potassium chanr      | 1   | 1  | 412.56  | 357.39  | 80.29   | 0.02     | 502.75  | 379.75  | 249.91  | 233.13  | 2748.49  |
| Kcnt1   | potassium chanr      | 8   | 2  | 128.16  | 135.62  | 66.55   | 6627.47  | 326.19  | 1229.61 | 3307.04 | 2147.53 | 4411.61  |
| Khdrbs1 | KH domain contæ      | 14  | 2  | 34.11   | 304.10  | 16.27   | 481.86   | 32.51   | 0.02    | 0.02    | 0.02    | 22.49    |
| Khsrp   | KH-type splicing     | 15  | 2  | 46.36   | 0.04    | 0.04    | 16.38    | 6.24    | 143.42  | 110.37  | 62.66   | 162.48   |
| Klhl4   | kelch-like 4 (Dro    | 2   | 2  | 0.03    | 0.04    | 0.04    | 0.02     | 0.03    | 12.90   | 2721.09 | 2299.96 | 0.11     |
| Kpnb1   | karyopherin (imp     | 43  | 7  | 1533.31 | 1173.66 | 1247.39 | 1169.05  | 337.14  | 286.82  | 951.43  | 573.73  | 608.12   |
| Lamp2   | lysosomal-assoc      | 49  | 6  | 262.63  | 142.90  | 118.71  | 36.66    | 1231.94 | 1220.35 | 857.21  | 1009.53 | 263.44   |
| Lars    | leucyl-tRNA synt     | 10  | 2  | 0.43    | 19.02   | 0.04    | 26.58    | 118.74  | 126.00  | 12.75   | 3.28    | 71.32    |
| Lasp1   | LIM and SH3 prc      | 9   | 3  | 0.03    | 0.04    | 8.40    | 51.88    | 26.67   | 0.02    | 14.87   | 15.04   | 1121.10  |
| Lbr     | lamin B receptor     | 19  | 3  | 176.47  | 102.87  | 202.42  | 40.39    | 134.79  | 186.01  | 930.36  | 463.75  | 27.70    |
| Lcp1    | lymphocyte cytoç     | 568 | 25 | 3421.40 | 2164.19 | 9994.76 | 18074.70 | 5895.39 | 6298.14 | 8295.01 | 8291.81 | 11408.86 |
| Ldha    | lactate dehydrog     | 118 | 10 | 1505.30 | 2313.50 | 1822.13 | 2854.96  | 5523.78 | 5670.06 | 4077.50 | 4840.96 | 782.94   |
| Letm1   | leucine zipper-EI    | 15  | 3  | 4.53    | 27.46   | 325.09  | 317.32   | 600.46  | 360.18  | 271.49  | 135.35  | 1217.70  |
| Lgals1  | lectin, galactose    | 125 | 2  | 192.08  | 144.59  | 1543.70 | 960.73   | 26.28   | 20.02   | 14.56   | 96.82   | 1311.03  |
| Lgals3  | lectin, galactose    | 12  | 4  | 103.23  | 291.36  | 1963.96 | 5576.50  | 93.59   | 82.20   | 64.90   | 129.24  | 1438.78  |
| Lingo3  | leucine rich repe    | 1   | 1  | 539.42  | 128.10  | 0.04    | 0.02     | 144.94  | 228.59  | 326.88  | 255.64  | 0.11     |
| Lipa    | lysosomal acid li    | 3   | 1  | 0.03    | 4.57    | 758.72  | 0.02     | 129.95  | 97.79   | 1.64    | 15.65   | 845.82   |
| Lman1   | lectin, mannose-     | 3   | 1  | 568.30  | 992.22  | 0.04    | 0.02     | 0.03    | 0.02    | 0.02    | 0.02    | 130.72   |
| Lmf2    | lipase maturator     | 23  | 3  | 390.27  | 534.12  | 535.91  | 1454.75  | 1002.15 | 566.93  | 572.00  | 348.08  | 66.22    |
| Lmna    | lamin A Gene         | 251 | 9  | 2102.89 | 2948.81 | 816.53  | 657.53   | 3377.87 | 4513.89 | 4113.00 | 4601.94 | 425.47   |
| Lmnb1   | lamin B1 Gene        | 98  | 6  | 1781.48 | 1776.42 | 1723.33 | 1029.47  | 308.05  | 776.15  | 2148.12 | 2291.62 | 2149.49  |
| Lnpep   | leucyl/cystinyl an   | 5   | 2  | 568.67  | 582.84  | 70.45   | 149.89   | 1.67    | 54.05   | 13.82   | 0.99    | 1985.07  |
| Lonp1   | lon peptidase 1,     | 93  | 6  | 575.08  | 957.55  | 127.73  | 1176.12  | 1654.90 | 1123.22 | 911.36  | 1248.59 | 1559.56  |
| Lpcat3  | lysophosphatidyl     | 4   | 1  | 0.03    | 118.29  | 56.32   | 34.62    | 91.34   | 42.31   | 0.02    | 0.02    | 158.60   |
| Lphn3   | latrophilin 3 Gen    | 45  | 1  | 75.35   | 70.39   | 0.04    | 0.02     | 169.08  | 158.39  | 90.59   | 47.04   | 1102.44  |
| Lrat    | lecithin-retinol ac  | 7   | 7  | 103.68  | 302.63  | 429.91  | 0.81     | 37.19   | 170.41  | 51.79   | 18.40   | 94.05    |
| Lrpap1  | low density lipop    | 21  | 2  | 2280.31 | 1741.48 | 0.04    | 42.06    | 350.99  | 269.10  | 579.24  | 695.66  | 13.69    |
| Lrpprc  | leucine-rich PPR     | 45  | 8  | 2004.39 | 694.49  | 113.99  | 4423.09  | 1945.35 | 1831.91 | 1014.08 | 928.15  | 327.41   |
| Lrrc59  | leucine rich repe    | 79  | 9  | 3564.45 | 1275.01 | 451.06  | 157.32   | 5387.34 | 4510.04 | 2291.73 | 2101.04 | 430.16   |

|          |                     |      |    |          |         |         |         |         |         |          |          |         |
|----------|---------------------|------|----|----------|---------|---------|---------|---------|---------|----------|----------|---------|
| Lrrc68   | leucine rich repe   | 9    | 3  | 24.27    | 665.32  | 929.64  | 0.02    | 6.77    | 0.02    | 26.24    | 33.03    | 681.37  |
| Lrrfp1   | leucine rich repe   | 5    | 2  | 86.71    | 0.04    | 3.53    | 1.30    | 0.03    | 5.85    | 0.02     | 0.02     | 6.69    |
| Lsp1     | lymphocyte spec     | 19   | 3  | 35.59    | 77.52   | 58.58   | 403.52  | 101.72  | 17.92   | 47.85    | 28.53    | 1014.87 |
| Luc7l    | Luc7 homolog (S     | 5    | 1  | 2.53     | 3.08    | 3.35    | 7.09    | 1.22    | 1.07    | 4.20     | 5.64     | 0.11    |
| Luc7l2   | LUC7-like 2 (S. c   | 9    | 1  | 33.71    | 12.27   | 116.74  | 28.31   | 18.51   | 30.42   | 29.38    | 26.84    | 6.81    |
| Lyn      | Yamaguchi sarco     | 23   | 3  | 150.28   | 70.08   | 23.32   | 135.79  | 525.85  | 441.29  | 84.00    | 100.99   | 11.95   |
| M6pr     | mannose-6-phos      | 20   | 2  | 3497.12  | 577.51  | 4.25    | 39.95   | 0.03    | 31.04   | 624.78   | 375.95   | 0.11    |
| Magi1    | membrane assoi      | 5    | 3  | 0.03     | 614.17  | 584.25  | 1163.77 | 13.05   | 279.66  | 711.13   | 139.14   | 43.71   |
| Manf     | mesencephalic e     | 29   | 5  | 714.83   | 455.56  | 343.50  | 2143.06 | 382.35  | 641.65  | 1097.57  | 990.04   | 297.84  |
| Marcksl1 | MARCKS-like 1 (     | 4    | 1  | 35.87    | 215.34  | 57.91   | 0.02    | 0.03    | 1.17    | 0.02     | 0.02     | 0.11    |
| Mars     | methionine-tRNA     | 7    | 1  | 180.83   | 169.76  | 0.04    | 329.57  | 909.10  | 845.76  | 258.94   | 108.72   | 126.13  |
| Matr3    | matrin 3 Gene       | 9    | 2  | 69.93    | 154.60  | 55.89   | 64.82   | 34.84   | 32.79   | 386.95   | 166.05   | 26.41   |
| Mcm3     | minichromosome      | 9    | 2  | 300.75   | 1489.44 | 243.96  | 167.07  | 153.31  | 85.25   | 18.72    | 36.12    | 1209.47 |
| Mcm7     | minichromosome      | 1    | 1  | 169.52   | 144.31  | 0.04    | 150.60  | 214.92  | 171.53  | 222.79   | 211.12   | 0.11    |
| Mcoln3   | mucolipin 3 Gene    | 1    | 1  | 11.45    | 0.04    | 132.74  | 0.02    | 105.38  | 61.33   | 44.05    | 52.51    | 4648.20 |
| Mdh1     | malate dehydrog     | 10   | 3  | 230.77   | 275.87  | 136.04  | 16.61   | 672.13  | 722.21  | 477.29   | 483.48   | 120.19  |
| Mdh2     | malate dehydrog     | 1283 | 11 | 16246.13 | 7463.84 | 3356.68 | 3394.62 | 4788.26 | 4955.32 | 17897.57 | 19956.40 | 3083.47 |
| Me2      | malic enzyme 2,     | 20   | 1  | 0.03     | 235.95  | 455.89  | 0.02    | 0.03    | 40.77   | 526.50   | 342.67   | 291.37  |
| Mett10d  | methyltransferas    | 2    | 2  | 0.03     | 0.04    | 2.03    | 13.37   | 4.68    | 35.70   | 3.13     | 11.87    | 0.11    |
| Mfge8    | milk fat globule-E  | 20   | 1  | 699.17   | 1622.99 | 1658.51 | 1586.36 | 634.00  | 586.12  | 311.18   | 413.43   | 232.28  |
| Mfn2     | mitofusin 2 Gene    | 5    | 5  | 111.34   | 897.40  | 1353.58 | 0.02    | 135.26  | 504.10  | 7.49     | 0.02     | 0.11    |
| Mfsd10   | major facilitator s | 6    | 2  | 437.69   | 365.28  | 40.52   | 316.74  | 659.90  | 788.44  | 485.27   | 859.31   | 44.15   |
| Mgl2     | macrophage gal      | 20   | 4  | 2170.38  | 1978.23 | 247.46  | 447.53  | 134.02  | 13.25   | 1514.60  | 1408.63  | 49.15   |
| Mif      | macrophage mig      | 31   | 1  | 54.71    | 55.82   | 43.81   | 189.45  | 96.58   | 57.82   | 739.12   | 905.17   | 44.64   |
| Mkl2     | MKL/myocardin-      | 3    | 3  | 0.03     | 571.43  | 0.04    | 268.10  | 9.12    | 0.02    | 1223.08  | 1609.60  | 0.11    |
| Mlec     | malectin Gene       | 2    | 1  | 146.55   | 11.89   | 0.04    | 97.99   | 39.76   | 42.56   | 0.02     | 0.02     | 0.11    |
| Mocs1    | molybdenum cof      | 1    | 1  | 0.90     | 7.31    | 8.64    | 30.15   | 4.29    | 101.34  | 126.80   | 5.40     | 0.11    |
| Mogs     | mannosyl-oligos     | 8    | 3  | 1046.53  | 247.58  | 450.31  | 15.95   | 248.86  | 142.73  | 35.63    | 33.20    | 449.33  |
| Mpeg1    | macrophage exp      | 48   | 5  | 4514.56  | 1826.14 | 2169.56 | 135.38  | 1172.55 | 1009.43 | 1344.30  | 1314.63  | 0.59    |
| Mpp6     | membrane prote      | 2    | 2  | 332.15   | 543.42  | 499.86  | 257.60  | 450.50  | 462.12  | 102.50   | 121.90   | 1566.29 |
| Mrpl39   | mitochondrial rib   | 1    | 1  | 385.79   | 56.36   | 0.04    | 14.90   | 106.33  | 182.33  | 240.52   | 318.85   | 0.11    |
| Mrps10   | mitochondrial rib   | 31   | 5  | 237.08   | 123.82  | 313.49  | 67.22   | 342.65  | 771.06  | 83.17    | 52.89    | 581.56  |
| Mrps27   | mitochondrial rib   | 3    | 1  | 85.69    | 25.53   | 0.04    | 0.02    | 89.83   | 51.65   | 60.07    | 51.94    | 287.77  |
| Mrps36   | mitochondrial rib   | 23   | 3  | 2022.76  | 60.23   | 233.44  | 51.06   | 41.80   | 94.52   | 1473.70  | 1289.45  | 0.11    |
| Mrps5    | mitochondrial rib   | 2    | 1  | 74.73    | 0.04    | 9.48    | 0.02    | 0.03    | 1.77    | 77.62    | 85.30    | 0.11    |
| Mrps7    | mitochondrial ribo  | 2    | 1  | 628.41   | 394.35  | 60.89   | 35.14   | 672.71  | 522.69  | 384.79   | 378.36   | 11.19   |
| Msn      | moesin Gene         | 525  | 16 | 739.09   | 981.51  | 4100.76 | 1670.60 | 3478.98 | 3924.42 | 2188.97  | 1967.69  | 3101.30 |

|         |                   |     |    |          |          |          |          |          |          |          |          |          |
|---------|-------------------|-----|----|----------|----------|----------|----------|----------|----------|----------|----------|----------|
| Msr1    | macrophage sca    | 2   | 1  | 0.03     | 0.04     | 0.04     | 0.02     | 0.03     | 0.02     | 17.71    | 6.82     | 0.11     |
| Mtap    | methylthioadeno   | 45  | 5  | 191.38   | 291.78   | 2150.52  | 1302.72  | 395.69   | 442.40   | 318.55   | 440.53   | 10.08    |
| Mtch2   | mitochondrial ca  | 24  | 3  | 149.63   | 36.15    | 72.30    | 14.67    | 189.75   | 383.94   | 623.07   | 159.50   | 16.00    |
| Mthfd1  | methylenetetrah   | 2   | 2  | 59.57    | 65.53    | 85.30    | 349.85   | 76.43    | 49.54    | 21.12    | 88.14    | 4991.94  |
| Mthfd11 | methylenetetrah   | 85  | 12 | 368.37   | 454.22   | 222.81   | 333.34   | 677.48   | 897.56   | 1659.69  | 1622.87  | 509.21   |
| Mthfd2  | methylenetetrah   | 13  | 3  | 544.56   | 184.17   | 35.72    | 126.68   | 276.54   | 328.94   | 354.29   | 348.67   | 263.91   |
| Mtpn    | myotrophin Gene   | 4   | 1  | 0.03     | 384.66   | 1038.05  | 28.95    | 13.35    | 0.02     | 0.02     | 0.02     | 0.11     |
| Mttp    | microsomal trigly | 16  | 2  | 763.93   | 1047.12  | 90.03    | 227.63   | 1271.60  | 1119.77  | 287.26   | 377.86   | 110.75   |
| Mvp     | major vault prote | 16  | 2  | 1835.59  | 783.71   | 220.65   | 703.14   | 3536.70  | 2711.43  | 1278.63  | 1271.66  | 18.78    |
| Mybbp1a | MYB binding pro   | 26  | 5  | 451.61   | 219.99   | 648.19   | 963.91   | 1109.65  | 1471.54  | 217.24   | 79.89    | 7750.84  |
| Myh10   | myosin, heavy pr  | 9   | 6  | 4099.51  | 7096.19  | 390.10   | 475.70   | 1395.40  | 1251.38  | 1359.80  | 1767.66  | 69.90    |
| Myh11   | myosin, heavy pr  | 4   | 3  | 33.40    | 0.04     | 2680.59  | 3055.06  | 90.67    | 55.26    | 24.99    | 37.78    | 118.90   |
| Myh14   | myosin, heavy pr  | 5   | 3  | 37.34    | 108.68   | 22.62    | 0.02     | 78.13    | 76.09    | 31.61    | 29.77    | 280.14   |
| Myh9    | myosin, heavy pr  | 895 | 49 | 36290.89 | 31711.67 | 27491.24 | 51850.38 | 10281.49 | 10087.66 | 19902.52 | 20447.08 | 5209.95  |
| Myl12b  | myosin, light cha | 9   | 1  | 817.01   | 169.07   | 0.04     | 26.73    | 1.57     | 0.02     | 78.80    | 16.71    | 20.77    |
| Myl6    | myosin, light pol | 94  | 7  | 3150.78  | 1449.98  | 2082.94  | 6043.30  | 236.62   | 390.18   | 988.06   | 996.96   | 161.66   |
| Myo1c   | myosin IC Gene    | 7   | 2  | 0.03     | 41.82    | 103.43   | 0.02     | 0.03     | 79.99    | 0.02     | 6.20     | 51.99    |
| Myo1f   | myosin IF Gene    | 22  | 4  | 1214.77  | 1566.57  | 184.75   | 854.92   | 961.66   | 171.71   | 302.07   | 350.63   | 0.11     |
| Myo1g   | myosin IG Gene    | 42  | 5  | 260.99   | 299.11   | 236.60   | 694.80   | 272.64   | 329.20   | 137.71   | 64.56    | 138.05   |
| Myog    | myogenin Gene     | 4   | 1  | 319.57   | 61.44    | 29.30    | 9.19     | 1034.52  | 942.91   | 274.85   | 257.41   | 481.57   |
| Naa10   | N(alpha)-acetyltr | 1   | 1  | 0.03     | 0.04     | 0.04     | 0.02     | 0.03     | 0.02     | 0.02     | 0.02     | 8.65     |
| Naca    | nascent polypep   | 35  | 15 | 759.56   | 333.32   | 154.57   | 658.88   | 4955.60  | 4445.43  | 7997.58  | 7388.49  | 14655.54 |
| Naga    | N-acetyl galactos | 13  | 3  | 12.50    | 26.54    | 0.04     | 3.54     | 149.94   | 123.08   | 90.16    | 117.82   | 0.11     |
| Naglu   | alpha-N-acetylgl  | 7   | 1  | 0.03     | 0.04     | 0.04     | 0.02     | 0.03     | 20.42    | 1423.60  | 538.93   | 0.11     |
| Nap111  | nucleosome ass    | 49  | 3  | 2060.32  | 1942.45  | 2493.83  | 1769.76  | 301.63   | 266.96   | 1457.66  | 1819.39  | 0.11     |
| Nap114  | nucleosome ass    | 5   | 2  | 68.08    | 21.08    | 203.03   | 191.50   | 5.85     | 14.06    | 99.75    | 90.99    | 8.55     |
| Napa    | N-ethylmaleimide  | 40  | 3  | 111.24   | 43.98    | 141.46   | 13.09    | 143.40   | 383.19   | 81.12    | 8.64     | 253.28   |
| Nars    | asparaginyl-tRN   | 23  | 2  | 175.66   | 0.04     | 53.35    | 33.23    | 51.88    | 37.26    | 628.89   | 552.76   | 2.97     |
| Nceh1   | arylacetamide de  | 4   | 2  | 0.03     | 0.04     | 49.74    | 19.47    | 0.03     | 22.47    | 0.02     | 0.02     | 3036.51  |
| Ncf1    | neutrophil cytos  | 9   | 2  | 436.16   | 1825.95  | 55.66    | 200.40   | 613.00   | 477.93   | 277.20   | 297.92   | 236.19   |
| Nckap1  | NCK-associated    | 18  | 5  | 210.77   | 25.67    | 0.04     | 1777.42  | 443.26   | 1807.19  | 689.56   | 271.41   | 379.86   |
| Ncl     | nucleolin Gene    | 227 | 14 | 3238.78  | 3218.08  | 5285.56  | 5179.68  | 3778.90  | 3805.01  | 5722.59  | 5657.57  | 339.21   |
| Ncor1   | nuclear receptor  | 337 | 13 | 6042.23  | 7668.22  | 6732.76  | 4501.83  | 6853.48  | 5773.22  | 3755.65  | 3364.27  | 23029.24 |
| Ncstn   | nicastrin Gene    | 4   | 1  | 436.36   | 412.26   | 15.07    | 16.39    | 8.75     | 0.02     | 177.65   | 104.34   | 28.22    |
| Ndc80   | NDC80 homolog     | 1   | 1  | 0.03     | 7.15     | 0.04     | 47.70    | 3.71     | 0.02     | 0.02     | 0.02     | 377.42   |
| Ndrp1   | N-myc downstre    | 4   | 1  | 0.03     | 0.04     | 0.04     | 0.02     | 0.03     | 0.02     | 2.30     | 0.02     | 0.11     |
| Ndufa11 | NADH dehydrog     | 3   | 1  | 42.46    | 0.04     | 72.84    | 0.02     | 234.90   | 103.71   | 70.31    | 85.45    | 0.11     |

|         |                   |    |   |         |         |         |         |         |         |         |         |         |
|---------|-------------------|----|---|---------|---------|---------|---------|---------|---------|---------|---------|---------|
| Ndufa13 | NADH dehydrog     | 4  | 1 | 0.03    | 15.41   | 0.04    | 0.02    | 61.65   | 59.87   | 0.02    | 0.02    | 0.11    |
| Ndufa2  | NADH dehydrog     | 5  | 1 | 0.03    | 0.04    | 283.44  | 0.02    | 0.03    | 15.94   | 11.99   | 0.02    | 0.11    |
| Ndufa4  | NADH dehydrog     | 50 | 1 | 147.52  | 377.31  | 138.73  | 91.25   | 1224.76 | 948.44  | 89.54   | 186.53  | 32.55   |
| Ndufa8  | NADH dehydrog     | 1  | 1 | 89.77   | 840.11  | 0.04    | 20.04   | 18.53   | 9.20    | 0.02    | 0.02    | 0.11    |
| Ndufa9  | NADH dehydrog     | 1  | 1 | 0.03    | 20.82   | 0.04    | 43.41   | 0.03    | 0.02    | 2.47    | 0.02    | 13.44   |
| Ndufb10 | NADH dehydrog     | 37 | 2 | 33.81   | 18.02   | 233.51  | 51.95   | 797.02  | 779.55  | 58.23   | 161.56  | 32.96   |
| Ndufb11 | NADH dehydrog     | 6  | 1 | 0.03    | 0.04    | 0.04    | 0.02    | 0.03    | 32.65   | 6.21    | 8.61    | 17.45   |
| Ndufb5  | NADH dehydrog     | 1  | 1 | 0.03    | 0.04    | 80.58   | 0.02    | 0.03    | 0.02    | 31.60   | 0.02    | 82.48   |
| Ndufc2  | NADH dehydrog     | 1  | 1 | 121.40  | 92.54   | 0.04    | 0.02    | 291.48  | 271.99  | 107.61  | 224.18  | 294.46  |
| Ndufs1  | NADH dehydrog     | 35 | 5 | 536.01  | 433.95  | 1859.59 | 439.69  | 219.53  | 88.05   | 238.61  | 239.46  | 979.25  |
| Ndufs3  | NADH dehydrog     | 23 | 5 | 139.30  | 103.13  | 86.84   | 346.79  | 130.88  | 136.65  | 39.88   | 137.97  | 1232.44 |
| Ndufs4  | NADH dehydrog     | 3  | 1 | 0.03    | 0.04    | 0.04    | 0.02    | 0.03    | 0.02    | 0.02    | 0.02    | 55.62   |
| Ndufs8  | NADH dehydrog     | 3  | 1 | 0.03    | 0.04    | 0.04    | 0.02    | 0.03    | 0.02    | 0.02    | 0.02    | 0.11    |
| Ndufv1  | NADH dehydrog     | 2  | 1 | 0.03    | 0.04    | 0.04    | 0.02    | 0.03    | 0.02    | 0.02    | 0.02    | 28.29   |
| Ndufv2  | NADH dehydrog     | 3  | 2 | 120.65  | 460.33  | 15.27   | 429.94  | 55.81   | 37.42   | 42.24   | 60.80   | 118.55  |
| Nfatc1  | nuclear factor of | 3  | 2 | 0.03    | 0.04    | 3448.49 | 0.02    | 0.03    | 0.02    | 0.02    | 0.02    | 431.52  |
| Nlrp2   | NLR family, pyrri | 7  | 3 | 2.35    | 0.53    | 0.04    | 0.02    | 95.22   | 65.99   | 0.02    | 0.02    | 22.40   |
| Nme1    | non-metastatic c  | 3  | 1 | 0.03    | 0.04    | 792.49  | 0.02    | 0.03    | 0.02    | 0.02    | 0.02    | 1.39    |
| Nme2    | non-metastatic c  | 10 | 4 | 179.40  | 41.04   | 3367.60 | 149.81  | 33.28   | 62.04   | 110.86  | 153.53  | 19.47   |
| Nono    | non-POU-domai     | 26 | 2 | 375.03  | 2234.26 | 675.29  | 857.92  | 863.24  | 855.13  | 993.26  | 1578.76 | 197.59  |
| Nop56   | NOP56 ribonucle   | 44 | 6 | 295.97  | 999.61  | 556.03  | 1437.23 | 274.47  | 669.23  | 1317.67 | 1461.77 | 1347.79 |
| Nop58   | NOP58 ribonucle   | 11 | 3 | 1600.93 | 190.65  | 207.83  | 21.76   | 119.11  | 84.51   | 68.76   | 137.27  | 89.59   |
| Npc1    | Niemann Pick ty   | 4  | 1 | 111.93  | 55.24   | 1824.37 | 0.02    | 51.15   | 51.41   | 69.13   | 118.77  | 713.03  |
| Nploc4  | nuclear protein l | 1  | 1 | 385.47  | 268.18  | 502.64  | 266.98  | 157.49  | 202.13  | 280.89  | 352.62  | 119.80  |
| Npm1    | nucleophosmin 1   | 87 | 9 | 2120.76 | 3824.44 | 1535.89 | 5545.29 | 33.65   | 30.90   | 1594.96 | 1958.33 | 111.47  |
| Nsfl1c  | NSFL1 (p97) cof   | 6  | 2 | 4.08    | 65.02   | 5605.46 | 46.54   | 3.09    | 47.65   | 13.09   | 1.39    | 75.22   |
| Nsun2   | NOL1/NOP2/Sur     | 3  | 1 | 0.03    | 31.45   | 0.04    | 0.02    | 628.01  | 533.95  | 13.10   | 20.47   | 0.11    |
| Nucb2   | nucleobindin 2 G  | 15 | 2 | 27.77   | 88.01   | 375.60  | 1261.34 | 200.15  | 91.26   | 60.05   | 77.36   | 5.38    |
| Nup133  | nucleoporin 133   | 1  | 1 | 0.03    | 0.04    | 0.04    | 1.02    | 0.03    | 0.02    | 0.02    | 0.02    | 0.11    |
| Oas1g   | 2'-5' oligoadenyl | 27 | 2 | 1359.86 | 1020.08 | 26.31   | 385.86  | 995.19  | 1419.05 | 2939.81 | 3053.11 | 54.56   |
| Oas3    | 2'-5' oligoadenyl | 37 | 3 | 1099.46 | 159.29  | 30.34   | 0.02    | 495.77  | 425.20  | 978.09  | 1184.45 | 315.40  |
| Oas1l   | 2'-5' oligoadenyl | 5  | 3 | 171.27  | 889.83  | 2215.21 | 146.42  | 490.02  | 450.13  | 213.62  | 309.60  | 893.83  |
| Oat     | ornithine aminotr | 76 | 8 | 2099.22 | 2665.19 | 2524.48 | 2450.71 | 1968.47 | 1502.45 | 1112.75 | 1209.05 | 3277.93 |
| Obscn   | obscurin, cytoske | 3  | 3 | 0.03    | 311.38  | 836.20  | 0.02    | 0.03    | 0.02    | 0.02    | 0.02    | 0.11    |
| Oc90    | otoconin 90 Gen   | 15 | 8 | 845.75  | 11.03   | 107.91  | 20.58   | 1046.63 | 20.64   | 0.02    | 2.10    | 113.39  |
| Ociad1  | OCIA domain co    | 15 | 1 | 150.98  | 0.04    | 0.04    | 0.69    | 46.58   | 132.53  | 3.44    | 0.02    | 0.11    |
| Odz1    | odd Oz/ten-m hc   | 2  | 2 | 499.69  | 647.54  | 97.94   | 0.02    | 62.96   | 23.08   | 0.59    | 6.53    | 13.88   |

|         |                    |     |    |         |         |          |         |          |          |         |          |          |
|---------|--------------------|-----|----|---------|---------|----------|---------|----------|----------|---------|----------|----------|
| Ogdh    | oxoglutarate deh   | 49  | 7  | 1755.26 | 686.25  | 1353.78  | 515.37  | 283.70   | 143.62   | 1020.48 | 1265.08  | 3553.17  |
| Oip5    | Opa interacting p  | 3   | 1  | 195.27  | 146.95  | 43.74    | 250.69  | 1048.57  | 914.36   | 182.03  | 203.19   | 1204.79  |
| Ola1    | Obg-like ATPase    | 5   | 1  | 0.03    | 5.93    | 99.38    | 12.28   | 0.03     | 2.48     | 42.22   | 32.25    | 23.90    |
| Olf1313 | olfactory recepto  | 2   | 2  | 165.17  | 0.04    | 0.04     | 0.02    | 0.03     | 0.02     | 0.02    | 0.02     | 0.11     |
| Olf1389 | olfactory recepto  | 17  | 16 | 150.10  | 233.25  | 434.83   | 16.77   | 0.47     | 0.02     | 0.02    | 0.58     | 3.16     |
| Olf1599 | olfactory recepto  | 3   | 3  | 22.91   | 366.48  | 155.36   | 0.02    | 0.03     | 0.02     | 0.02    | 0.02     | 0.11     |
| Olf1644 | olfactory recepto  | 20  | 18 | 568.12  | 653.88  | 1560.84  | 748.35  | 5.67     | 12.23    | 4.00    | 1.44     | 632.37   |
| Olf1645 | olfactory recepto  | 2   | 1  | 2.12    | 0.04    | 0.04     | 34.89   | 0.03     | 10.02    | 1.41    | 14.45    | 0.11     |
| Olf165  | olfactory recepto  | 12  | 12 | 70.82   | 104.64  | 234.08   | 674.29  | 0.03     | 4.98     | 0.02    | 1.91     | 212.49   |
| Olf1695 | olfactory recepto  | 2   | 1  | 319.76  | 151.85  | 0.04     | 0.02    | 758.30   | 806.97   | 149.08  | 112.47   | 0.11     |
| Osbp18  | oxysterol binding  | 54  | 6  | 858.38  | 236.47  | 71.32    | 157.82  | 673.92   | 719.32   | 279.68  | 305.95   | 25.30    |
| Ostf1   | osteoclast stimul  | 3   | 1  | 8.65    | 12.87   | 1628.49  | 6.97    | 0.59     | 3.39     | 3.10    | 0.66     | 2.44     |
| Oxct1   | 3-oxoacid CoA tr   | 1   | 1  | 6.92    | 0.04    | 0.04     | 20.99   | 25.51    | 21.60    | 371.89  | 408.27   | 0.11     |
| Oxsm    | 3-oxoacyl-ACP s    | 1   | 1  | 15.17   | 4.32    | 15.52    | 0.02    | 4.21     | 0.02     | 11.15   | 1.01     | 0.11     |
| P4hb    | prolyl 4-hydroxyl  | 334 | 16 | 508.29  | 787.92  | 11100.61 | 3206.66 | 5276.82  | 6131.19  | 5147.16 | 6374.24  | 2106.81  |
| Pa2g4   | proliferation-assc | 20  | 2  | 46.80   | 394.28  | 63.22    | 278.39  | 433.61   | 304.12   | 40.47   | 45.42    | 276.14   |
| Pabpc1  | poly(A) binding p  | 84  | 8  | 130.38  | 321.91  | 181.61   | 65.23   | 504.81   | 464.48   | 1240.74 | 1212.21  | 2677.19  |
| Pabpc2  | poly(A) binding p  | 2   | 2  | 4437.22 | 1470.16 | 315.46   | 260.15  | 89.72    | 139.85   | 2324.53 | 2203.61  | 413.40   |
| Pabpc6  | poly(A) binding p  | 1   | 1  | 0.03    | 0.32    | 0.04     | 0.02    | 0.28     | 0.02     | 0.02    | 0.02     | 0.11     |
| Pak2    | p21 protein (Cdc   | 9   | 1  | 0.03    | 32.42   | 7.82     | 378.07  | 0.03     | 0.02     | 0.02    | 4.12     | 0.11     |
| Pappa   | pregnancy-assoc    | 12  | 1  | 71.12   | 94.03   | 0.04     | 0.02    | 153.73   | 101.02   | 62.25   | 33.40    | 276.40   |
| Park7   | Parkinson diseas   | 8   | 1  | 0.03    | 473.27  | 112.93   | 278.09  | 484.14   | 351.10   | 16.56   | 16.89    | 90.28    |
| Pcbp1   | poly(rC) binding   | 56  | 3  | 1371.38 | 435.68  | 85.86    | 2993.36 | 2021.66  | 2401.43  | 350.26  | 213.14   | 47.78    |
| Pcdhb9  | protocadherin be   | 3   | 3  | 13.79   | 19.19   | 51.29    | 24.97   | 79.00    | 113.06   | 10.65   | 6.28     | 238.13   |
| Pck2    | phosphoenolpyru    | 67  | 7  | 3301.89 | 1373.29 | 167.65   | 3105.78 | 6102.86  | 4942.25  | 1312.31 | 1442.67  | 779.61   |
| Pdha1   | pyruvate dehydr    | 40  | 3  | 12.76   | 45.83   | 3892.45  | 10.05   | 28.92    | 60.15    | 300.75  | 433.22   | 704.39   |
| Pdha2   | pyruvate dehydr    | 100 | 6  | 1500.48 | 1605.41 | 895.78   | 576.73  | 3076.62  | 2618.57  | 1580.83 | 1851.29  | 195.47   |
| Pdia3   | protein disulfide  | 339 | 20 | 3703.91 | 8092.15 | 2841.64  | 4517.37 | 8573.73  | 7054.51  | 4184.43 | 3987.88  | 15193.21 |
| Pdia4   | protein disulfide  | 127 | 10 | 1875.84 | 2250.53 | 2628.38  | 1138.72 | 4219.05  | 3870.30  | 2402.86 | 2595.72  | 4114.95  |
| Pdia6   | protein disulfide  | 299 | 9  | 3031.65 | 4734.89 | 1246.76  | 2922.43 | 12231.32 | 13440.34 | 9774.33 | 10694.14 | 6141.31  |
| Pdk3    | pyruvate dehydr    | 1   | 1  | 22.29   | 52.81   | 0.04     | 0.02    | 79.48    | 32.63    | 0.02    | 0.02     | 437.52   |
| Pdpk1   | 3-phosphoinositi   | 4   | 3  | 470.80  | 2919.36 | 7520.21  | 2572.11 | 788.26   | 3288.97  | 3059.52 | 593.17   | 860.99   |
| Pds5a   | PDS5, regulator    | 10  | 1  | 23.97   | 27.59   | 6.15     | 0.02    | 26.98    | 2.73     | 0.24    | 0.02     | 0.11     |
| Pebp1   | phosphatidyletha   | 1   | 1  | 43.21   | 42.53   | 1604.73  | 0.02    | 547.00   | 260.41   | 0.02    | 0.02     | 0.11     |
| Pex14   | peroxisomal bioç   | 2   | 1  | 483.25  | 142.17  | 152.08   | 0.02    | 160.45   | 1.12     | 6.83    | 0.98     | 0.11     |
| Pf1k1   | phosphofructokir   | 30  | 3  | 697.28  | 160.47  | 6.04     | 47.89   | 418.11   | 393.59   | 1144.14 | 941.52   | 507.86   |
| Pfn1    | profilin 1 Gene    | 96  | 5  | 2776.98 | 1935.43 | 3568.10  | 6774.83 | 1218.19  | 1255.78  | 3439.08 | 3778.54  | 70.93    |

|         |                    |     |    |         |          |          |          |          |          |          |          |         |
|---------|--------------------|-----|----|---------|----------|----------|----------|----------|----------|----------|----------|---------|
| Pgam1   | phosphoglycerat    | 88  | 7  | 3286.58 | 2511.67  | 6609.92  | 5025.43  | 1483.96  | 687.13   | 4380.14  | 5564.30  | 6052.70 |
| Pgd     | phosphoglucona     | 49  | 4  | 898.56  | 367.69   | 2397.15  | 2938.11  | 580.43   | 739.01   | 903.47   | 786.25   | 35.21   |
| Pgk1    | phosphoglycerat    | 221 | 14 | 1808.12 | 1504.90  | 3896.75  | 4411.46  | 3351.61  | 3340.81  | 5610.08  | 5181.18  | 1252.67 |
| Pgk2    | phosphoglycerat    | 7   | 2  | 246.66  | 125.87   | 34.73    | 64.36    | 224.46   | 240.69   | 288.17   | 296.42   | 4124.84 |
| Pgrmc1  | progesterone rec   | 1   | 1  | 339.89  | 573.29   | 0.04     | 18.35    | 0.03     | 0.02     | 0.02     | 0.02     | 0.11    |
| Pgrmc2  | progesterone rec   | 3   | 1  | 24.36   | 36.04    | 53.77    | 12.94    | 161.07   | 108.26   | 19.43    | 9.13     | 708.73  |
| Pgs1    | phosphatidylglyc   | 16  | 1  | 292.75  | 26.55    | 0.04     | 0.02     | 18.17    | 38.49    | 187.04   | 189.43   | 12.55   |
| Phb     | prohibitin Gene    | 181 | 9  | 4118.86 | 1015.11  | 1355.96  | 884.55   | 2408.65  | 2421.03  | 8717.92  | 8357.19  | 150.71  |
| Phb2    | prohibitin 2 Gene  | 101 | 6  | 3057.97 | 1543.72  | 1045.68  | 1603.14  | 4300.69  | 4402.11  | 1277.81  | 1243.71  | 215.34  |
| Pign    | phosphatidylinos   | 1   | 1  | 75.43   | 9.46     | 0.04     | 0.02     | 15.78    | 8.63     | 0.02     | 7.37     | 0.11    |
| Pigs    | phosphatidylinos   | 4   | 2  | 115.20  | 8.57     | 0.04     | 0.02     | 17.71    | 7.56     | 18.54    | 9.33     | 4.87    |
| Pik3cd  | phosphatidylinos   | 2   | 2  | 0.03    | 0.04     | 0.04     | 0.02     | 864.81   | 86.55    | 3.74     | 0.02     | 12.80   |
| Pira3   | paired-Ig-like rec | 2   | 2  | 0.03    | 1.25     | 2.53     | 2.34     | 0.18     | 0.02     | 0.02     | 0.02     | 0.11    |
| Pkm2    | pyruvate kinase,   | 356 | 17 | 8138.81 | 15142.74 | 12137.43 | 16008.70 | 8314.48  | 6846.76  | 10033.13 | 11687.66 | 700.88  |
| Pla2g4a | phospholipase A    | 4   | 2  | 236.17  | 121.03   | 11.56    | 5.92     | 185.20   | 52.10    | 29.08    | 28.48    | 93.44   |
| Pld4    | phospholipase D    | 9   | 4  | 1484.95 | 412.65   | 371.60   | 1087.98  | 914.77   | 55.46    | 790.84   | 618.39   | 1721.26 |
| Plec1   | plectin 1 Gene     | 303 | 51 | 9343.50 | 9734.31  | 13999.31 | 7178.45  | 18162.67 | 15926.19 | 8898.66  | 9477.27  | 3210.48 |
| Plek    | pleckstrin Gene    | 6   | 2  | 434.60  | 367.64   | 45.50    | 95.07    | 425.03   | 409.00   | 834.83   | 967.02   | 88.96   |
| Plekhf1 | pleckstrin homolo  | 1   | 1  | 391.83  | 15.80    | 0.04     | 0.02     | 20.28    | 0.02     | 0.02     | 0.02     | 0.11    |
| Plekho2 | pleckstrin homolo  | 9   | 2  | 36.27   | 4.74     | 8.58     | 0.07     | 25.29    | 13.49    | 0.19     | 0.02     | 207.66  |
| Plod1   | procollagen-lysin  | 11  | 1  | 239.67  | 218.21   | 631.70   | 678.53   | 1656.58  | 1546.51  | 421.10   | 537.05   | 741.93  |
| Pls3    | plastin 3 (T-isofo | 3   | 2  | 1052.42 | 3204.35  | 0.04     | 696.97   | 491.30   | 1161.77  | 0.02     | 0.02     | 271.53  |
| Pnp1    | purine-nucleosid   | 2   | 2  | 126.27  | 1.54     | 0.04     | 82.23    | 0.84     | 2.69     | 315.08   | 470.23   | 87.57   |
| Pnpt1   | polyribonucleotic  | 7   | 3  | 730.56  | 8056.52  | 2273.60  | 3637.04  | 115.71   | 153.65   | 774.98   | 775.39   | 45.27   |
| Pogk    | pogo transposab    | 4   | 3  | 1.89    | 0.04     | 20.54    | 0.02     | 39.39    | 51.21    | 5.07     | 0.87     | 112.61  |
| Polq    | polymerase (DN     | 20  | 1  | 140.40  | 0.04     | 0.04     | 0.02     | 601.79   | 768.05   | 138.05   | 143.08   | 0.11    |
| Por     | P450 (cytochror    | 64  | 5  | 1462.89 | 263.67   | 31.93    | 515.33   | 148.96   | 644.89   | 835.06   | 1071.38  | 27.55   |
| Ppia    | peptidylprolyl iso | 101 | 6  | 901.59  | 835.34   | 3711.59  | 2889.63  | 2085.83  | 1885.72  | 4018.90  | 4039.73  | 601.18  |
| Ppib    | peptidylprolyl iso | 1   | 1  | 763.28  | 801.59   | 190.56   | 547.16   | 755.24   | 607.81   | 217.48   | 458.24   | 329.49  |
| Ppp1ca  | protein phosphat   | 6   | 1  | 0.03    | 0.04     | 145.45   | 33.14    | 16.70    | 0.02     | 314.19   | 518.12   | 44.77   |
| Ppp1cc  | protein phosphat   | 10  | 2  | 1812.16 | 943.94   | 70.06    | 47.71    | 130.63   | 125.06   | 990.02   | 761.12   | 213.93  |
| Ppp2r1a | protein phosphat   | 20  | 4  | 483.10  | 931.11   | 329.73   | 301.78   | 150.52   | 125.82   | 617.68   | 984.61   | 37.64   |
| Prdx1   | peroxiredoxin 1 (  | 232 | 8  | 250.74  | 536.95   | 841.84   | 2438.93  | 2532.63  | 2903.17  | 2220.81  | 2942.60  | 2185.41 |
| Prdx2   | peroxiredoxin 2 (  | 12  | 2  | 0.03    | 0.04     | 738.63   | 0.02     | 0.03     | 6.12     | 1.53     | 0.02     | 12.89   |
| Prdx3   | peroxiredoxin 3 (  | 15  | 1  | 26.39   | 105.74   | 0.04     | 51.14    | 422.84   | 272.30   | 24.86    | 76.41    | 690.93  |
| Prdx4   | peroxiredoxin 4 (  | 15  | 4  | 474.96  | 16.79    | 0.04     | 190.86   | 1430.20  | 2135.79  | 903.95   | 1063.58  | 59.77   |
| Prdx5   | peroxiredoxin 5 (  | 105 | 7  | 154.56  | 120.27   | 906.09   | 501.34   | 239.16   | 224.62   | 2067.99  | 2421.11  | 218.07  |

|        |                    |     |    |         |          |          |         |          |          |         |         |         |
|--------|--------------------|-----|----|---------|----------|----------|---------|----------|----------|---------|---------|---------|
| Prdx6  | peroxiredoxin 6 (  | 12  | 5  | 47.42   | 15.68    | 7056.20  | 970.98  | 0.03     | 2.90     | 135.44  | 260.26  | 15.93   |
| Prkaca | protein kinase, c  | 1   | 1  | 2.13    | 22.50    | 0.04     | 10.63   | 12.15    | 42.87    | 23.22   | 0.02    | 0.11    |
| Prkacb | protein kinase, c  | 4   | 1  | 1.98    | 0.04     | 929.83   | 0.02    | 89.94    | 46.91    | 1.17    | 0.02    | 0.11    |
| Prkcq  | protein kinase C   | 9   | 4  | 935.09  | 599.55   | 147.91   | 163.37  | 709.46   | 521.54   | 237.51  | 241.06  | 32.13   |
| Prl7c1 | prolactin family 7 | 6   | 6  | 389.69  | 298.02   | 1713.40  | 578.81  | 166.04   | 107.17   | 52.54   | 146.21  | 929.14  |
| Prpf8  | pre-mRNA proce     | 16  | 4  | 731.70  | 223.14   | 241.02   | 241.20  | 336.12   | 367.24   | 630.81  | 780.30  | 9.87    |
| Prss1  | protease, serine,  | 68  | 2  | 415.64  | 554.45   | 224.32   | 377.29  | 998.37   | 1047.51  | 661.45  | 967.54  | 0.11    |
| Psap   | prosaposin Gene    | 14  | 3  | 84.51   | 64.96    | 865.23   | 38.40   | 1.59     | 19.08    | 171.59  | 144.88  | 6.23    |
| Psm2   | proteasome (pro    | 4   | 1  | 0.03    | 0.04     | 22.13    | 0.02    | 0.03     | 0.84     | 0.02    | 0.02    | 0.11    |
| Psmb1  | proteasome (pro    | 2   | 1  | 234.39  | 137.87   | 0.04     | 131.91  | 137.89   | 129.40   | 84.04   | 160.31  | 0.11    |
| Psmb6  | proteasome (pro    | 1   | 1  | 58.27   | 30.36    | 27.47    | 0.02    | 0.03     | 0.02     | 0.02    | 2.07    | 0.11    |
| Psmb8  | proteasome (pro    | 3   | 1  | 131.11  | 257.11   | 672.49   | 834.99  | 478.97   | 846.72   | 645.69  | 680.89  | 264.62  |
| Psmc1  | protease (proso    | 2   | 1  | 9.71    | 0.04     | 11.31    | 265.89  | 4.86     | 4.78     | 7.35    | 3.74    | 0.11    |
| Psmc3  | proteasome (pro    | 67  | 5  | 563.65  | 14067.76 | 0.04     | 992.53  | 588.87   | 249.50   | 524.29  | 533.30  | 156.48  |
| Psmc5  | protease (proso    | 1   | 1  | 11.47   | 7.02     | 23.66    | 394.73  | 1.21     | 0.02     | 22.15   | 52.89   | 1.68    |
| Psmc6  | proteasome (pro    | 18  | 5  | 160.88  | 59.23    | 1517.19  | 23.13   | 144.92   | 197.32   | 66.73   | 59.07   | 15.25   |
| Psmd11 | proteasome (pro    | 17  | 1  | 9.23    | 0.04     | 0.04     | 0.02    | 322.52   | 282.66   | 0.02    | 6.24    | 173.32  |
| Psmd12 | proteasome (pro    | 5   | 3  | 101.80  | 39.64    | 554.28   | 18.91   | 4.87     | 12.75    | 121.49  | 137.00  | 0.11    |
| Psmd2  | proteasome (pro    | 9   | 1  | 95.58   | 52.12    | 30.19    | 52.89   | 40.60    | 30.23    | 128.66  | 141.59  | 0.11    |
| Psmd3  | proteasome (pro    | 3   | 2  | 380.16  | 45.89    | 146.16   | 0.02    | 451.71   | 209.11   | 788.07  | 614.47  | 0.11    |
| Psm1   | proteasome (pro    | 7   | 2  | 68.00   | 39.32    | 77.15    | 59.85   | 724.98   | 214.79   | 209.07  | 182.00  | 2069.93 |
| Ptbp1  | polypyrimidine tr  | 43  | 6  | 676.27  | 521.95   | 1464.77  | 2457.40 | 21.67    | 171.82   | 131.07  | 168.19  | 0.11    |
| Ptges3 | prostaglandin E :  | 1   | 1  | 201.91  | 43.57    | 182.85   | 485.58  | 57.89    | 45.84    | 203.65  | 170.91  | 26.62   |
| Ptms   | parathyrosin Ge    | 1   | 1  | 0.03    | 0.04     | 1.21     | 0.02    | 0.03     | 0.02     | 0.02    | 0.02    | 0.11    |
| Ptpn2  | protein tyrosine p | 11  | 3  | 805.21  | 992.66   | 925.43   | 398.05  | 916.76   | 663.16   | 427.78  | 335.24  | 1205.63 |
| Ptpn22 | protein tyrosine p | 10  | 1  | 0.03    | 0.04     | 15.09    | 0.02    | 17.18    | 4.03     | 1.19    | 7.00    | 7.93    |
| Ptpn6  | protein tyrosine p | 164 | 12 | 6195.60 | 2891.32  | 13686.58 | 5483.35 | 10804.88 | 10632.37 | 3426.42 | 3438.91 | 225.87  |
| Ptprc  | protein tyrosine p | 71  | 9  | 1914.59 | 937.39   | 379.69   | 409.38  | 192.10   | 358.27   | 785.22  | 842.81  | 321.51  |
| Pttrf  | polymerase I anc   | 32  | 2  | 943.72  | 353.70   | 890.68   | 87.47   | 854.41   | 1124.46  | 221.38  | 306.46  | 217.15  |
| Purg   | purine-rich elem   | 1   | 1  | 749.62  | 186.40   | 0.04     | 0.02    | 266.50   | 49.92    | 2008.16 | 2512.13 | 0.11    |
| Pycr2  | pyrroline-5-carbc  | 33  | 4  | 347.85  | 411.02   | 1538.56  | 47.72   | 1220.00  | 1161.09  | 412.00  | 415.98  | 991.46  |
| Pyhin1 | pyrin and HIN dc   | 4   | 1  | 81.92   | 15.83    | 0.04     | 103.80  | 120.04   | 26.36    | 9.72    | 75.53   | 694.63  |
| Rab1   | RAB1, member I     | 70  | 3  | 2509.28 | 821.48   | 203.96   | 276.04  | 775.22   | 1325.81  | 1425.84 | 1606.74 | 1094.11 |
| Rab10  | RAB10, member      | 8   | 3  | 2.22    | 705.57   | 412.09   | 733.25  | 0.03     | 5.42     | 118.27  | 223.09  | 204.23  |
| Rab11b | RAB11B, membe      | 8   | 1  | 39.71   | 36.15    | 0.04     | 11.16   | 316.54   | 331.75   | 24.50   | 13.48   | 0.11    |
| Rab14  | RAB14, member      | 53  | 6  | 1482.34 | 2171.89  | 3244.84  | 1088.15 | 2230.77  | 2223.20  | 4289.29 | 4219.13 | 7388.27 |
| Rab15  | RAB15, member      | 3   | 2  | 91.50   | 85.32    | 122.22   | 161.83  | 366.31   | 380.63   | 12.15   | 14.81   | 55.12   |

|         |                    |     |   |         |          |          |         |         |         |         |         |          |
|---------|--------------------|-----|---|---------|----------|----------|---------|---------|---------|---------|---------|----------|
| Rab18   | RAB18, member      | 13  | 2 | 0.03    | 0.04     | 0.04     | 0.02    | 77.47   | 52.06   | 120.38  | 197.43  | 1186.73  |
| Rab1b   | RAB1B, member      | 78  | 6 | 3268.58 | 1370.64  | 469.88   | 1747.43 | 1255.86 | 1206.21 | 2070.43 | 2518.53 | 1160.79  |
| Rab2a   | RAB2A, member      | 10  | 2 | 134.49  | 355.73   | 675.74   | 265.97  | 171.49  | 246.16  | 46.91   | 30.76   | 735.71   |
| Rab2b   | RAB2B, member      | 2   | 2 | 0.73    | 14.47    | 0.04     | 2.20    | 63.37   | 345.83  | 207.27  | 200.21  | 2188.37  |
| Rab5c   | RAB5C, member      | 33  | 3 | 2247.00 | 845.28   | 10206.37 | 181.05  | 1338.42 | 1016.70 | 1012.94 | 1364.33 | 1406.01  |
| Rab7    | RAB7, member       | 121 | 5 | 3540.04 | 2389.94  | 1446.19  | 980.36  | 4221.96 | 2990.20 | 3544.28 | 3664.98 | 2605.42  |
| Rab8a   | RAB8A, member      | 1   | 1 | 0.03    | 0.04     | 116.93   | 562.19  | 30.18   | 28.79   | 4.13    | 0.02    | 67.64    |
| Rab8b   | RAB8B, member      | 15  | 1 | 28.14   | 0.04     | 19.41    | 11.33   | 209.70  | 211.05  | 25.73   | 23.76   | 0.11     |
| Rac1    | RAS-related C3     | 76  | 6 | 1099.62 | 7673.15  | 2443.10  | 1005.38 | 371.86  | 1140.47 | 544.10  | 931.55  | 2443.99  |
| Rac2    | RAS-related C3     | 71  | 3 | 1113.22 | 548.23   | 1523.58  | 0.02    | 1998.66 | 2097.20 | 1869.34 | 2122.84 | 27.27    |
| Rad54l  | RAD54 like (S. c   | 3   | 1 | 0.03    | 4.32     | 0.04     | 0.02    | 6.35    | 0.02    | 0.02    | 1.21    | 20.95    |
| Ralgps2 | Ral GEF with PH    | 2   | 2 | 0.03    | 0.74     | 1.41     | 0.02    | 0.35    | 0.02    | 0.02    | 0.43    | 58.90    |
| Raly    | hnRNP-associated   | 4   | 1 | 1008.77 | 0.04     | 0.04     | 0.02    | 890.22  | 681.48  | 13.78   | 0.02    | 10.35    |
| Ran     | RAN, member R      | 66  | 6 | 4827.44 | 2953.91  | 3545.10  | 2796.34 | 403.08  | 160.15  | 1919.66 | 2100.22 | 695.64   |
| Ranbp1  | RAN binding pro    | 10  | 2 | 866.53  | 66.24    | 49.71    | 142.99  | 1204.66 | 1013.16 | 579.09  | 449.05  | 784.56   |
| Rangap1 | RAN GTPase ac      | 8   | 1 | 10.70   | 17.71    | 544.89   | 0.02    | 192.72  | 84.67   | 0.02    | 12.24   | 0.11     |
| Rap1a   | RAS-related prof   | 13  | 3 | 491.23  | 557.83   | 1446.51  | 1461.54 | 469.00  | 548.36  | 221.99  | 132.86  | 82.89    |
| Rap1b   | RAS related prot   | 7   | 1 | 0.03    | 22.51    | 0.04     | 0.02    | 0.03    | 0.02    | 49.01   | 59.07   | 1281.65  |
| Rars    | arginyl-tRNA syn   | 1   | 1 | 0.03    | 0.04     | 130.15   | 0.02    | 7.41    | 3.78    | 0.02    | 1.85    | 462.69   |
| Rasgrp1 | RAS guanyl rele    | 3   | 3 | 0.03    | 0.04     | 14.24    | 18.57   | 6.61    | 0.02    | 0.02    | 5.63    | 53.12    |
| Rbbp7   | retinoblastoma b   | 13  | 2 | 300.55  | 106.32   | 62.59    | 0.02    | 566.43  | 547.38  | 454.67  | 488.98  | 41.54    |
| Rbbp8   | retinoblastoma b   | 15  | 2 | 200.51  | 0.04     | 0.04     | 205.97  | 151.71  | 687.69  | 55.64   | 6.94    | 0.11     |
| Rbm14   | RNA binding mo     | 32  | 1 | 42.01   | 46.63    | 10.91    | 0.02    | 0.03    | 0.79    | 0.02    | 0.02    | 0.11     |
| Rbm3    | RNA binding mo     | 32  | 3 | 148.15  | 326.03   | 82.63    | 85.40   | 1226.34 | 979.73  | 47.29   | 114.15  | 573.28   |
| Rbmx    | RNA binding mo     | 1   | 1 | 11.33   | 7.65     | 0.04     | 0.02    | 0.03    | 0.02    | 34.41   | 3.65    | 36.59    |
| Rbpj    | recombination si   | 8   | 3 | 3538.00 | 723.86   | 77.06    | 723.87  | 3461.77 | 2529.56 | 72.75   | 92.88   | 156.21   |
| Rc3h1   | RING CCCH (C3      | 2   | 2 | 2.31    | 0.04     | 59.28    | 322.22  | 7.93    | 0.02    | 413.58  | 526.40  | 1056.20  |
| Refbp2  | RNA and export     | 1   | 1 | 0.03    | 0.04     | 0.04     | 0.02    | 0.03    | 0.02    | 0.02    | 0.02    | 376.43   |
| Relb    | avian reticuloenc  | 1   | 1 | 0.24    | 0.04     | 8.81     | 0.02    | 17.19   | 11.88   | 1.19    | 0.02    | 4.10     |
| Rg9mtd1 | RNA (guanine-9-    | 5   | 1 | 18.73   | 3.53     | 6.33     | 0.02    | 48.31   | 21.04   | 6.22    | 0.23    | 29.65    |
| Rgmb    | RGM domain far     | 2   | 2 | 0.03    | 0.04     | 4.15     | 0.02    | 140.75  | 223.84  | 41.73   | 72.99   | 1401.50  |
| Rnf169  | ring finger protei | 11  | 3 | 0.03    | 0.04     | 0.04     | 0.02    | 214.71  | 80.31   | 0.02    | 0.02    | 0.11     |
| Rnf17   | ring finger protei | 2   | 1 | 629.01  | 337.40   | 27.13    | 2418.08 | 33.14   | 0.02    | 0.02    | 0.02    | 4.17     |
| Rnf213  | ring finger protei | 30  | 8 | 252.78  | 1247.20  | 27331.96 | 154.44  | 741.90  | 648.26  | 113.07  | 119.67  | 3569.51  |
| Rnh1    | ribonuclease/anç   | 3   | 2 | 0.03    | 4.21     | 1155.13  | 1144.72 | 0.03    | 0.02    | 0.02    | 0.02    | 44.28    |
| Rpl10   | ribosomal proteir  | 53  | 3 | 1116.35 | 1285.28  | 50.65    | 129.04  | 2882.31 | 2207.26 | 1134.04 | 1624.58 | 0.11     |
| Rpl10a  | ribosomal proteir  | 104 | 8 | 1792.56 | 12090.69 | 217.50   | 3595.81 | 1137.61 | 765.41  | 4036.78 | 3745.01 | 14749.00 |

|        |                    |     |    |         |         |         |         |         |         |         |         |          |
|--------|--------------------|-----|----|---------|---------|---------|---------|---------|---------|---------|---------|----------|
| Rpl12  | ribosomal proteir  | 6   | 1  | 21.73   | 0.04    | 31.98   | 458.10  | 105.74  | 99.03   | 18.51   | 144.45  | 66.48    |
| Rpl14  | ribosomal proteir  | 1   | 1  | 63.28   | 46.65   | 2349.86 | 6.37    | 36.39   | 3.79    | 69.63   | 152.56  | 0.11     |
| Rpl15  | ribosomal proteir  | 20  | 2  | 934.22  | 634.72  | 34.84   | 95.53   | 804.07  | 961.62  | 853.64  | 1013.48 | 12335.85 |
| Rpl17  | ribosomal proteir  | 2   | 1  | 0.03    | 0.04    | 0.04    | 0.02    | 0.03    | 0.02    | 10.05   | 0.02    | 75.42    |
| Rpl18  | ribosomal proteir  | 62  | 1  | 245.78  | 230.73  | 37.79   | 36.06   | 1224.13 | 884.50  | 235.37  | 264.73  | 54.41    |
| Rpl19  | ribosomal proteir  | 30  | 2  | 97.64   | 120.62  | 82.49   | 15.84   | 415.90  | 325.80  | 494.12  | 636.29  | 42.85    |
| Rpl22  | ribosomal proteir  | 2   | 1  | 0.03    | 0.04    | 0.04    | 0.02    | 0.03    | 2.75    | 30.62   | 0.02    | 0.11     |
| Rpl23  | ribosomal proteir  | 40  | 1  | 533.57  | 631.57  | 165.95  | 213.89  | 908.04  | 833.02  | 492.64  | 580.44  | 0.11     |
| Rpl23a | ribosomal proteir  | 1   | 1  | 0.03    | 0.04    | 0.04    | 120.52  | 0.03    | 0.02    | 0.02    | 0.02    | 411.38   |
| Rpl24  | ribosomal proteir  | 42  | 3  | 725.51  | 345.58  | 173.31  | 55.33   | 1378.87 | 1331.42 | 898.57  | 858.99  | 53.24    |
| Rpl27  | ribosomal proteir  | 40  | 3  | 517.70  | 21.74   | 0.04    | 1436.90 | 490.19  | 1572.44 | 1349.37 | 1679.37 | 6455.14  |
| Rpl27a | ribosomal proteir  | 32  | 2  | 28.70   | 0.04    | 0.04    | 0.02    | 253.91  | 235.76  | 253.66  | 519.24  | 25.51    |
| Rpl30  | ribosomal proteir  | 2   | 1  | 105.94  | 1081.01 | 120.53  | 1275.57 | 41.71   | 0.02    | 0.02    | 10.86   | 374.75   |
| Rpl31  | ribosomal proteir  | 50  | 1  | 661.30  | 445.67  | 208.97  | 178.09  | 1249.92 | 1380.79 | 598.37  | 631.84  | 22.77    |
| Rpl37a | ribosomal proteir  | 11  | 1  | 0.03    | 30.40   | 0.04    | 38.77   | 0.03    | 75.31   | 741.70  | 667.90  | 1015.35  |
| Rpl38  | ribosomal proteir  | 59  | 3  | 743.53  | 309.11  | 0.04    | 0.02    | 1047.61 | 874.14  | 834.80  | 813.78  | 0.11     |
| Rpl4   | ribosomal proteir  | 142 | 8  | 1322.68 | 327.76  | 784.81  | 2531.64 | 2327.85 | 2062.72 | 2380.20 | 1843.06 | 457.23   |
| Rpl5   | ribosomal proteir  | 24  | 2  | 12.39   | 0.04    | 0.04    | 0.02    | 29.89   | 23.73   | 54.72   | 66.54   | 16.38    |
| Rpl6   | ribosomal proteir  | 48  | 8  | 1255.25 | 1086.85 | 356.36  | 1062.13 | 13.11   | 34.92   | 1459.06 | 1734.52 | 26.33    |
| Rpl7   | ribosomal proteir  | 99  | 3  | 1959.82 | 3238.59 | 436.69  | 710.36  | 3070.99 | 2399.81 | 1413.25 | 1595.14 | 1714.50  |
| Rplp0  | ribosomal proteir  | 68  | 3  | 1426.63 | 1105.26 | 1588.74 | 995.27  | 1212.79 | 1118.36 | 1867.83 | 2169.38 | 1402.76  |
| Rplp1  | ribosomal proteir  | 83  | 2  | 1810.98 | 2043.13 | 1108.85 | 1894.60 | 1349.80 | 1284.67 | 1106.41 | 1012.19 | 22.03    |
| Rplp2  | ribosomal proteir  | 163 | 18 | 9819.78 | 6707.42 | 3403.15 | 7207.58 | 5073.45 | 7157.53 | 5685.58 | 4801.07 | 1853.08  |
| Rpn1   | ribophorin I Gene  | 105 | 12 | 2498.13 | 3972.00 | 1472.77 | 1223.03 | 1089.22 | 1041.78 | 1367.64 | 1588.13 | 4820.87  |
| Rpn2   | ribophorin II Gene | 81  | 10 | 2370.58 | 785.50  | 1966.38 | 861.56  | 3029.69 | 3321.53 | 3471.63 | 4320.26 | 77.11    |
| Rps10  | ribosomal proteir  | 54  | 3  | 2335.22 | 2234.92 | 753.51  | 818.33  | 8.84    | 23.01   | 894.78  | 772.42  | 241.36   |
| Rps13  | ribosomal proteir  | 56  | 5  | 1718.41 | 109.33  | 137.83  | 4.03    | 115.05  | 150.52  | 1639.77 | 1700.74 | 96.31    |
| Rps14  | ribosomal proteir  | 34  | 2  | 48.80   | 1741.43 | 1010.15 | 376.51  | 217.94  | 241.57  | 198.20  | 185.70  | 0.11     |
| Rps15  | ribosomal proteir  | 4   | 1  | 17.84   | 0.04    | 765.85  | 127.25  | 0.03    | 0.02    | 99.85   | 102.69  | 7.28     |
| Rps15a | ribosomal proteir  | 22  | 1  | 0.03    | 30.56   | 15.63   | 9.37    | 0.03    | 83.79   | 177.87  | 35.40   | 0.11     |
| Rps16  | ribosomal proteir  | 111 | 2  | 2529.56 | 2090.39 | 334.92  | 1153.55 | 3275.04 | 2174.77 | 385.60  | 372.83  | 10475.56 |
| Rps18  | ribosomal proteir  | 52  | 1  | 140.05  | 174.67  | 0.04    | 46.57   | 627.43  | 647.84  | 100.88  | 114.56  | 18.50    |
| Rps19  | ribosomal proteir  | 61  | 5  | 1346.01 | 1388.57 | 1782.51 | 738.54  | 1313.13 | 1095.00 | 1341.66 | 1552.04 | 6998.27  |
| Rps2   | ribosomal proteir  | 1   | 1  | 2.46    | 6.47    | 4.76    | 50.52   | 5.19    | 10.08   | 12.07   | 28.09   | 165.78   |
| Rps20  | ribosomal proteir  | 29  | 2  | 461.34  | 296.87  | 0.04    | 341.16  | 438.56  | 7.01    | 874.34  | 1019.28 | 0.11     |
| Rps21  | ribosomal proteir  | 1   | 1  | 0.03    | 0.04    | 3.67    | 60.68   | 0.03    | 0.02    | 1.47    | 0.02    | 0.11     |
| Rps24  | ribosomal proteir  | 35  | 1  | 561.87  | 439.10  | 163.59  | 143.53  | 1452.80 | 1652.76 | 531.10  | 739.17  | 0.11     |

|           |                    |    |   |         |         |          |         |         |         |         |         |         |
|-----------|--------------------|----|---|---------|---------|----------|---------|---------|---------|---------|---------|---------|
| Rps25     | ribosomal proteir  | 11 | 1 | 375.61  | 100.40  | 0.04     | 56.70   | 31.84   | 47.46   | 102.68  | 147.91  | 1003.22 |
| Rps26     | ribosomal proteir  | 17 | 1 | 1331.24 | 543.06  | 158.02   | 417.02  | 201.23  | 153.97  | 1123.25 | 1223.41 | 0.11    |
| Rps27l    | ribosomal proteir  | 38 | 1 | 258.27  | 3698.18 | 851.51   | 1812.42 | 824.44  | 925.13  | 935.37  | 1283.57 | 870.81  |
| Rps28     | ribosomal proteir  | 18 | 1 | 218.42  | 71.52   | 56.75    | 38.21   | 515.04  | 314.39  | 130.46  | 79.74   | 29.36   |
| Rps3      | ribosomal proteir  | 64 | 6 | 227.78  | 141.08  | 151.36   | 2168.88 | 669.01  | 582.92  | 305.83  | 89.33   | 365.82  |
| Rps3a     | ribosomal proteir  | 14 | 3 | 114.43  | 183.44  | 678.51   | 140.32  | 181.41  | 170.65  | 156.77  | 343.05  | 474.57  |
| Rps6      | ribosomal proteir  | 41 | 2 | 1793.81 | 824.21  | 111.18   | 927.11  | 3274.69 | 4538.08 | 2709.00 | 2750.12 | 1301.97 |
| Rpsa      | ribosomal proteir  | 1  | 1 | 530.45  | 83.57   | 108.11   | 13.46   | 20.87   | 0.02    | 1608.78 | 1229.05 | 0.11    |
| Rrbp1     | ribosome binding   | 13 | 5 | 876.31  | 10.62   | 0.04     | 600.00  | 481.26  | 533.47  | 209.65  | 59.88   | 409.95  |
| Rrp12     | ribosomal RNA p    | 5  | 1 | 4.65    | 0.04    | 0.04     | 268.90  | 0.03    | 0.02    | 71.72   | 91.63   | 48.46   |
| Rtn4      | reticulon 4 Gene   | 8  | 2 | 197.93  | 1163.76 | 0.04     | 0.02    | 83.51   | 201.28  | 207.99  | 293.94  | 0.11    |
| Ruvbl1    | RuvB-like proteir  | 12 | 1 | 3.08    | 8.63    | 13.01    | 0.02    | 508.30  | 434.41  | 21.73   | 38.34   | 0.11    |
| S100a10   | S100 calcium bir   | 33 | 3 | 929.69  | 1370.91 | 98.78    | 177.34  | 297.14  | 210.23  | 578.07  | 616.41  | 0.11    |
| S100a11   | S100 calcium bir   | 4  | 1 | 0.03    | 0.04    | 204.65   | 3.28    | 0.03    | 0.02    | 13.46   | 9.08    | 0.11    |
| S100a9    | S100 calcium bir   | 10 | 5 | 462.07  | 5.54    | 103.43   | 506.08  | 574.57  | 247.06  | 131.24  | 222.49  | 611.94  |
| Sacm1l    | SAC1 (suppress     | 3  | 1 | 378.60  | 78.24   | 0.04     | 26.34   | 0.03    | 0.02    | 38.85   | 41.74   | 0.11    |
| Sall4     | sal-like 4 (Droso  | 1  | 1 | 0.03    | 0.04    | 0.04     | 8.21    | 137.73  | 84.81   | 58.95   | 31.13   | 5300.29 |
| Samm50    | sorting and asse   | 4  | 1 | 0.03    | 100.05  | 0.04     | 0.02    | 64.84   | 65.00   | 0.02    | 0.02    | 1047.67 |
| Sap30bp   | SAP30 binding p    | 1  | 1 | 0.03    | 0.04    | 0.04     | 0.02    | 26.74   | 0.02    | 0.02    | 0.02    | 8202.50 |
| Sardh     | sarcosine dehyd    | 1  | 1 | 0.03    | 0.04    | 28.75    | 0.02    | 0.03    | 0.02    | 0.02    | 0.02    | 0.11    |
| Sars      | seryl-aminoacyl-   | 41 | 9 | 364.38  | 2765.94 | 845.64   | 5394.98 | 167.30  | 111.74  | 379.03  | 646.09  | 415.62  |
| Scpep1    | serine carboxype   | 3  | 1 | 15.53   | 4.56    | 32.13    | 442.30  | 0.03    | 0.02    | 0.02    | 0.02    | 0.11    |
| Scrn3     | secernin 3 Gene    | 1  | 1 | 391.24  | 0.04    | 0.04     | 41.35   | 475.19  | 470.29  | 0.02    | 0.77    | 0.11    |
| Sdha      | succinate dehyd    | 6  | 3 | 812.65  | 200.00  | 2290.75  | 6.93    | 2.16    | 32.10   | 392.43  | 442.93  | 5.04    |
| Sdhb      | succinate dehyd    | 35 | 3 | 889.33  | 1320.55 | 301.46   | 1064.29 | 161.60  | 243.43  | 201.44  | 67.49   | 0.11    |
| Sec22b    | SEC22 vesicle tr   | 25 | 3 | 689.65  | 131.25  | 19.62    | 79.89   | 526.53  | 722.89  | 806.71  | 556.00  | 31.23   |
| Sec23a    | SEC23A (S. cere    | 8  | 1 | 2.95    | 0.04    | 329.12   | 11.94   | 58.00   | 40.36   | 0.02    | 5.74    | 0.11    |
| Sec31b    | Sec31 homolog l    | 11 | 1 | 35.92   | 157.68  | 0.04     | 0.02    | 921.72  | 770.33  | 54.80   | 70.96   | 0.11    |
| Sec63     | SEC63-like (S. c   | 1  | 1 | 26.30   | 12.34   | 53.42    | 29.23   | 0.03    | 3.90    | 0.02    | 21.02   | 0.11    |
| Sept11    | septin 11 Gene     | 6  | 1 | 43.28   | 0.04    | 91.06    | 0.02    | 18.92   | 62.85   | 59.39   | 42.24   | 48.58   |
| Sept2     | septin 2 Gene      | 37 | 4 | 1194.12 | 2518.02 | 2295.96  | 724.64  | 820.99  | 433.09  | 538.45  | 494.69  | 14.27   |
| Sept6     | septin 6 Gene      | 25 | 3 | 118.24  | 15.88   | 29.30    | 10.82   | 787.94  | 657.84  | 362.39  | 445.58  | 2014.31 |
| Sept7     | septin 7 Gene      | 3  | 1 | 0.03    | 0.04    | 0.04     | 0.02    | 0.03    | 0.02    | 12.13   | 0.02    | 1123.95 |
| Serbp1    | serpine1 mRNA      | 16 | 2 | 2516.34 | 1705.97 | 25315.29 | 1622.60 | 1323.31 | 960.07  | 710.83  | 642.26  | 140.70  |
| Serpina3c | serine (or cysteir | 3  | 3 | 2.68    | 0.04    | 20.43    | 0.02    | 35.16   | 62.03   | 7.27    | 2.18    | 176.44  |
| Serpinb3b | serine (or cysteir | 1  | 1 | 0.03    | 0.04    | 11.64    | 2.28    | 3.30    | 5.70    | 0.94    | 0.71    | 63.40   |
| Serpinb3c | serine (or cysteir | 1  | 1 | 0.03    | 0.04    | 0.04     | 0.02    | 0.03    | 0.02    | 4.71    | 0.02    | 0.11    |

|           |                    |     |    |          |         |         |         |          |         |         |         |         |
|-----------|--------------------|-----|----|----------|---------|---------|---------|----------|---------|---------|---------|---------|
| Serpinb6a | serine (or cystein | 2   | 1  | 62.54    | 442.99  | 246.54  | 1597.97 | 271.43   | 124.81  | 42.21   | 95.01   | 1924.44 |
| Set       | SET translocatio   | 5   | 2  | 0.03     | 19.54   | 1218.80 | 47.83   | 0.03     | 7.31    | 143.34  | 138.25  | 0.11    |
| Sf3a2     | splicing factor 3a | 2   | 1  | 165.32   | 3.80    | 2081.14 | 44.66   | 119.24   | 114.50  | 0.02    | 0.02    | 0.11    |
| Sfn       | stratifin Gene     | 2   | 2  | 0.03     | 0.04    | 0.04    | 0.02    | 0.03     | 0.02    | 0.02    | 0.02    | 0.11    |
| Sfpq      | splicing factor pr | 41  | 7  | 1800.09  | 1743.36 | 345.04  | 871.59  | 1214.37  | 1094.60 | 1343.17 | 957.48  | 258.01  |
| Sftpc     | surfactant assoc   | 6   | 2  | 0.03     | 0.04    | 0.04    | 0.02    | 0.03     | 0.02    | 4034.14 | 4100.83 | 0.11    |
| Sfxn1     | sideroflexin 1 Ge  | 10  | 4  | 400.79   | 98.09   | 114.91  | 324.65  | 120.63   | 77.21   | 294.32  | 308.83  | 139.19  |
| Sfxn3     | sideroflexin 3 Ge  | 3   | 2  | 604.55   | 352.80  | 13.21   | 131.30  | 1066.42  | 1604.59 | 1601.44 | 2070.06 | 423.23  |
| Sgpl1     | sphingosine pho:   | 35  | 3  | 1016.98  | 304.40  | 311.06  | 326.86  | 1476.37  | 1121.02 | 1279.32 | 694.08  | 74.91   |
| Sh3bgrl3  | SH3 domain binc    | 1   | 1  | 9.74     | 0.04    | 0.04    | 649.53  | 0.03     | 0.02    | 0.02    | 0.02    | 0.11    |
| Sh3rf2    | SH3 domain con     | 3   | 2  | 447.53   | 163.82  | 0.04    | 0.02    | 1149.45  | 803.92  | 242.83  | 250.63  | 0.11    |
| Shmt1     | serine hydroxym    | 1   | 1  | 102.96   | 13.66   | 0.04    | 18.26   | 0.03     | 0.02    | 238.96  | 191.18  | 0.11    |
| Shmt2     | serine hydroxym    | 163 | 9  | 4452.58  | 1268.89 | 339.29  | 1928.72 | 2471.63  | 2646.72 | 5589.37 | 5548.32 | 1069.08 |
| Siglec1   | sialic acid bindin | 11  | 4  | 126.57   | 2132.83 | 80.36   | 0.02    | 266.63   | 65.26   | 194.82  | 295.23  | 2896.10 |
| Sirpa     | signal-regulatory  | 1   | 1  | 632.20   | 176.23  | 73.61   | 1313.43 | 151.24   | 7.97    | 0.02    | 0.02    | 3.02    |
| Slc1a5    | solute carrier fan | 23  | 3  | 783.97   | 596.41  | 338.10  | 144.10  | 127.36   | 131.85  | 143.62  | 194.65  | 171.44  |
| Slc25a1   | solute carrier fan | 4   | 3  | 4171.90  | 1603.67 | 105.32  | 1364.61 | 2371.06  | 1549.52 | 1548.38 | 2182.00 | 866.44  |
| Slc25a11  | solute carrier fan | 46  | 4  | 229.51   | 40.75   | 281.86  | 57.04   | 126.55   | 463.82  | 1061.94 | 532.75  | 365.14  |
| Slc25a12  | solute carrier fan | 43  | 5  | 593.50   | 1165.46 | 300.07  | 196.34  | 222.65   | 237.21  | 591.76  | 876.28  | 1255.54 |
| Slc25a13  | solute carrier fan | 14  | 3  | 679.86   | 122.52  | 77.52   | 349.67  | 370.59   | 387.20  | 521.29  | 585.41  | 257.61  |
| Slc25a24  | solute carrier fan | 10  | 5  | 136.45   | 187.45  | 0.04    | 341.53  | 97.08    | 61.66   | 559.67  | 656.46  | 3959.42 |
| Slc25a3   | solute carrier fan | 63  | 4  | 519.41   | 1861.17 | 594.72  | 1321.72 | 72.92    | 506.25  | 1713.91 | 1389.29 | 396.27  |
| Slc25a31  | solute carrier fan | 1   | 1  | 34.18    | 87.66   | 140.38  | 0.02    | 127.06   | 157.50  | 22.11   | 34.48   | 434.17  |
| Slc25a4   | solute carrier fan | 44  | 1  | 564.08   | 594.27  | 0.04    | 42.01   | 1373.68  | 1814.27 | 315.27  | 306.11  | 18.83   |
| Slc25a5   | solute carrier fan | 761 | 9  | 10368.38 | 7956.88 | 3508.64 | 3873.97 | 11748.45 | 9466.56 | 7428.47 | 6463.45 | 4484.75 |
| Slc2a1    | solute carrier fan | 9   | 2  | 6.77     | 338.20  | 16.13   | 0.02    | 40.02    | 35.07   | 0.02    | 5.50    | 281.74  |
| Slc3a2    | solute carrier fan | 106 | 10 | 2609.46  | 3421.93 | 5895.20 | 1166.90 | 1239.81  | 1126.19 | 2596.06 | 2610.60 | 643.41  |
| Smarca5   | SWI/SNF relatec    | 1   | 1  | 8.80     | 981.18  | 0.04    | 166.38  | 0.03     | 0.02    | 0.02    | 0.02    | 30.24   |
| Smarcad1  | SWI/SNF-relatec    | 17  | 5  | 35.80    | 228.12  | 261.36  | 81.92   | 235.63   | 213.73  | 84.12   | 55.12   | 7218.59 |
| Smchd1    | SMC hinge dom:     | 8   | 1  | 38.39    | 0.04    | 0.04    | 0.02    | 145.03   | 170.02  | 0.02    | 0.02    | 41.31   |
| Snd1      | staphylococcal n   | 19  | 7  | 2044.63  | 2977.84 | 1554.21 | 1950.36 | 179.52   | 178.05  | 1177.01 | 1231.60 | 146.57  |
| Snrpc     | U1 small nuclear   | 1   | 1  | 971.16   | 412.28  | 0.04    | 945.79  | 520.37   | 494.07  | 0.02    | 19.10   | 0.11    |
| Snrpd1    | small nuclear rib  | 2   | 1  | 0.03     | 0.04    | 0.04    | 0.02    | 0.03     | 0.02    | 52.81   | 23.73   | 4.49    |
| Snrpd2    | small nuclear rib  | 6   | 1  | 0.03     | 6.20    | 34.84   | 0.02    | 19.81    | 23.13   | 0.02    | 0.02    | 0.11    |
| Snrpd3    | small nuclear rib  | 45  | 1  | 152.19   | 0.04    | 0.04    | 0.02    | 1103.30  | 999.84  | 104.38  | 73.94   | 106.61  |
| Snx18     | sorting nexin 18   | 2   | 1  | 17.93    | 0.04    | 0.04    | 0.02    | 410.70   | 324.12  | 0.02    | 29.69   | 0.11    |
| Snx2      | sorting nexin 2 C  | 4   | 1  | 0.03     | 1530.19 | 71.25   | 2449.26 | 36.77    | 0.02    | 136.04  | 77.01   | 0.11    |

|          |                                                    |     |    |         |         |         |         |         |         |         |         |         |
|----------|----------------------------------------------------|-----|----|---------|---------|---------|---------|---------|---------|---------|---------|---------|
| Sod2     | superoxide dismutase 2                             | 13  | 2  | 1479.66 | 478.12  | 187.52  | 642.59  | 40.25   | 122.42  | 821.43  | 841.97  | 262.84  |
| Sorcs1   | VPS10 domain containing 1                          | 1   | 1  | 0.03    | 10.69   | 348.31  | 147.04  | 0.03    | 0.02    | 72.91   | 70.38   | 154.48  |
| Sp1      | trans-acting transcription factor 1                | 4   | 1  | 48.01   | 40.76   | 145.91  | 0.02    | 5.00    | 0.02    | 0.02    | 0.02    | 0.11    |
| Spcs2    | signal peptidase 2                                 | 3   | 2  | 1266.13 | 1082.76 | 602.89  | 1154.25 | 200.60  | 109.48  | 226.54  | 96.97   | 0.11    |
| Spcs3    | signal peptidase 3                                 | 6   | 1  | 20.60   | 94.85   | 0.04    | 0.02    | 24.95   | 32.27   | 0.02    | 34.39   | 186.03  |
| Spn      | sialophorin Gene                                   | 6   | 1  | 221.86  | 43.21   | 97.05   | 1225.95 | 1241.27 | 951.90  | 670.74  | 842.58  | 0.11    |
| Spp1     | secreted phospholipase A2                          | 13  | 1  | 0.03    | 0.04    | 862.54  | 0.02    | 0.03    | 0.02    | 5.80    | 11.07   | 0.11    |
| Spt1     | salivary protein 1                                 | 4   | 3  | 25.26   | 12.07   | 101.18  | 39.78   | 61.11   | 64.61   | 0.13    | 0.02    | 0.11    |
| Sqrdl    | sulfide quinone reductase                          | 157 | 10 | 2366.64 | 4032.40 | 2322.90 | 1765.99 | 2861.58 | 1270.89 | 3458.68 | 3333.84 | 1006.53 |
| Sqstm1   | sequestosome 1                                     | 94  | 8  | 4180.05 | 2515.52 | 135.31  | 516.86  | 906.03  | 647.87  | 1054.55 | 809.01  | 1906.52 |
| Srrm1    | serine/arginine rich splicing factor 1             | 1   | 1  | 186.99  | 0.04    | 0.04    | 0.02    | 1604.62 | 1339.47 | 843.08  | 638.41  | 0.11    |
| Ssb      | Sjogren syndrome associated protein                | 58  | 6  | 658.38  | 280.45  | 1058.87 | 6.75    | 211.18  | 302.77  | 754.08  | 653.33  | 204.20  |
| Ssbp1    | single-stranded binding protein 1                  | 9   | 1  | 13.65   | 173.05  | 17.20   | 590.98  | 15.94   | 7.93    | 24.47   | 24.45   | 8.85    |
| Ssr1     | signal sequence                                    | 1   | 1  | 139.41  | 15.11   | 19.86   | 16.83   | 2.43    | 8.33    | 373.35  | 383.71  | 9.40    |
| Ssr3     | signal sequence                                    | 33  | 2  | 26.35   | 80.89   | 0.04    | 60.48   | 607.63  | 347.05  | 26.42   | 91.81   | 412.84  |
| Ssr4     | signal sequence                                    | 35  | 2  | 860.99  | 1067.19 | 136.75  | 24.56   | 807.10  | 652.69  | 585.73  | 559.95  | 71.05   |
| Ssrp1    | structure specific RNA binding protein 1           | 5   | 2  | 2431.95 | 554.18  | 68.82   | 35.48   | 388.54  | 175.55  | 457.99  | 398.28  | 29.70   |
| St13     | suppression of tumor necrosis factor receptor 1    | 6   | 1  | 0.03    | 112.73  | 0.04    | 13.00   | 23.70   | 40.97   | 0.02    | 0.02    | 95.18   |
| Stat1    | signal transducer and activator of transcription 1 | 40  | 5  | 1511.96 | 1718.52 | 1183.77 | 1273.66 | 1693.42 | 2005.44 | 927.58  | 813.93  | 2978.62 |
| Stat3    | signal transducer and activator of transcription 3 | 3   | 1  | 0.03    | 0.04    | 0.04    | 0.02    | 0.03    | 0.02    | 0.02    | 0.02    | 0.11    |
| Stip1    | stress-induced phosphatase 1                       | 22  | 3  | 362.76  | 156.24  | 22.56   | 43.74   | 60.78   | 40.28   | 314.03  | 342.19  | 83.54   |
| Stom     | stomatin Gene                                      | 28  | 6  | 1436.11 | 916.66  | 226.37  | 541.74  | 717.00  | 652.26  | 1007.29 | 985.29  | 452.95  |
| Stoml2   | stomatin (Epb7.2) like 2                           | 54  | 4  | 1104.00 | 1775.32 | 430.63  | 1058.14 | 466.52  | 369.88  | 1388.82 | 1134.84 | 9.57    |
| Stt3b    | STT3, subunit of                                   | 3   | 1  | 453.01  | 789.17  | 0.04    | 38.18   | 0.03    | 0.02    | 229.35  | 310.96  | 69.71   |
| Sucla2   | succinate-Coenzym A synthase 2                     | 7   | 2  | 440.35  | 81.44   | 24.25   | 0.02    | 0.03    | 3.88    | 456.86  | 490.91  | 204.13  |
| Suclg2   | succinate-Coenzym A synthase 2                     | 34  | 5  | 534.49  | 945.15  | 531.50  | 736.64  | 1137.12 | 2019.14 | 553.30  | 455.96  | 478.55  |
| Sulf2    | sulfatase 2 Gene                                   | 1   | 1  | 111.94  | 145.19  | 188.97  | 79.26   | 157.93  | 122.40  | 42.14   | 53.15   | 232.14  |
| Supt16h  | suppressor of tumor necrosis factor receptor 1     | 14  | 2  | 103.49  | 4.88    | 282.79  | 420.19  | 63.29   | 84.21   | 33.44   | 36.43   | 2142.69 |
| Surf4    | surfeit gene 4 Gene                                | 1   | 1  | 2.31    | 0.04    | 18.00   | 6.72    | 2.68    | 3.75    | 10.01   | 0.02    | 0.11    |
| Svil     | supervillin Gene                                   | 3   | 1  | 0.03    | 0.04    | 0.04    | 0.02    | 0.03    | 0.02    | 58.09   | 39.94   | 0.11    |
| Syncrinp | synaptotagmin binding protein                      | 15  | 5  | 561.61  | 584.29  | 1153.51 | 1210.66 | 670.04  | 520.21  | 387.14  | 522.24  | 1103.90 |
| Taf13    | TAF13 RNA polymerase II associated factor 13       | 7   | 1  | 138.72  | 2284.23 | 17.04   | 1866.53 | 562.37  | 35.54   | 18.14   | 86.47   | 279.40  |
| Tagln2   | transgelin 2 Gene                                  | 247 | 13 | 2391.49 | 1363.30 | 2997.34 | 3834.78 | 2722.47 | 2021.15 | 1651.33 | 2144.17 | 3861.10 |
| Tap1     | transporter 1, ATP binding cassette                | 4   | 1  | 1272.83 | 510.06  | 215.88  | 215.51  | 199.15  | 225.51  | 633.74  | 683.53  | 310.95  |
| Tap2     | transporter 2, ATP binding cassette                | 7   | 3  | 908.64  | 224.96  | 75.83   | 8.03    | 211.30  | 138.47  | 374.91  | 313.88  | 1046.44 |
| Tars     | threonyl-tRNA synthetase                           | 2   | 1  | 0.03    | 0.04    | 0.04    | 0.02    | 161.44  | 75.00   | 12.32   | 5.37    | 143.05  |
| Tbc1d12  | TBC1D12: TBC1 domain containing 12                 | 20  | 3  | 1423.07 | 153.64  | 160.99  | 2764.42 | 2223.82 | 7033.20 | 2418.05 | 970.85  | 1888.08 |

|          |                    |     |    |         |         |          |         |         |         |         |          |         |
|----------|--------------------|-----|----|---------|---------|----------|---------|---------|---------|---------|----------|---------|
| Tbx3     | T-box 3 Gene       | 2   | 1  | 51.24   | 76.39   | 6.98     | 0.02    | 23.39   | 34.22   | 37.05   | 24.49    | 0.11    |
| Tcea1    | transcription elor | 6   | 1  | 0.03    | 20.66   | 21.67    | 55.50   | 66.59   | 29.05   | 0.02    | 0.02     | 0.11    |
| Tcerg1   | transcription elor | 6   | 1  | 498.51  | 378.83  | 299.67   | 210.41  | 0.03    | 0.02    | 674.73  | 816.81   | 240.52  |
| Tcp1     | t-complex proteir  | 3   | 2  | 0.03    | 0.04    | 192.37   | 0.02    | 3.49    | 0.02    | 56.24   | 87.92    | 97.80   |
| Tfam     | transcription fact | 4   | 4  | 2441.07 | 253.09  | 0.04     | 574.72  | 851.09  | 973.27  | 988.99  | 531.15   | 1957.71 |
| Tfrc     | transferrin recep  | 6   | 1  | 0.03    | 0.04    | 0.04     | 14.68   | 0.03    | 11.78   | 11.58   | 31.37    | 113.80  |
| Thrap3   | thyroid hormone    | 1   | 1  | 0.03    | 0.04    | 0.04     | 27.65   | 0.03    | 0.02    | 0.02    | 0.02     | 0.11    |
| Timm13   | translocase of in  | 51  | 2  | 789.74  | 278.78  | 56.47    | 64.29   | 1801.85 | 1794.64 | 1254.27 | 1460.43  | 0.11    |
| Timm44   | translocase of in  | 9   | 2  | 17.42   | 153.48  | 16.79    | 0.02    | 288.01  | 200.00  | 28.31   | 30.30    | 2.62    |
| Timm50   | translocase of in  | 9   | 2  | 107.28  | 65.51   | 61.57    | 627.43  | 583.55  | 507.20  | 119.07  | 367.74   | 60.98   |
| Tkt      | transketolase Ge   | 129 | 11 | 738.19  | 171.60  | 19706.29 | 1234.56 | 2581.52 | 3081.48 | 3628.27 | 3922.66  | 1512.48 |
| Tln1     | talin 1 Gene       | 264 | 29 | 4507.31 | 1562.81 | 3020.03  | 3006.26 | 2512.45 | 2608.77 | 5711.39 | 5774.84  | 5495.38 |
| Tln2     | talin 2 Gene       | 5   | 5  | 22.95   | 187.48  | 17304.99 | 8188.85 | 23.17   | 45.68   | 21.40   | 45.66    | 34.31   |
| Tm9sf4   | transmembrane      | 6   | 1  | 58.85   | 104.75  | 933.89   | 1210.55 | 336.43  | 160.59  | 39.83   | 46.37    | 2066.99 |
| Tmed10   | transmembrane      | 48  | 5  | 1205.15 | 1717.95 | 97.87    | 305.32  | 1922.77 | 1594.82 | 797.83  | 777.04   | 467.36  |
| Tmed2    | transmembrane      | 5   | 3  | 213.84  | 78.66   | 639.03   | 133.13  | 62.37   | 30.25   | 186.86  | 202.67   | 41.35   |
| Tmed5    | transmembrane      | 30  | 2  | 141.04  | 227.07  | 47.22    | 78.23   | 1078.17 | 990.60  | 588.04  | 728.31   | 1.10    |
| Tmem132c | transmembrane      | 1   | 1  | 8.29    | 26.09   | 2063.78  | 33.56   | 0.03    | 9.23    | 39.25   | 86.36    | 0.11    |
| Tmem143  | transmembrane      | 17  | 2  | 0.03    | 70.03   | 74.50    | 174.48  | 19.22   | 0.02    | 838.37  | 1490.40  | 0.11    |
| Tmem161a | transmembrane      | 1   | 1  | 0.03    | 0.04    | 0.04     | 0.02    | 0.03    | 0.02    | 1.49    | 2.90     | 71.57   |
| Tmem25   | transmembrane      | 41  | 9  | 368.73  | 190.09  | 83.42    | 217.26  | 457.58  | 652.24  | 9638.06 | 10333.81 | 847.15  |
| Tmem64   | transmembrane      | 9   | 1  | 0.03    | 0.04    | 0.04     | 0.28    | 4.26    | 0.02    | 1.58    | 0.02     | 0.11    |
| Tmod3    | tropomodulin 3 C   | 12  | 1  | 94.15   | 75.34   | 62.48    | 81.80   | 10.95   | 0.79    | 110.58  | 173.01   | 11.99   |
| Tmpo     | thymopoietin Ge    | 99  | 10 | 5369.83 | 3464.95 | 1942.40  | 4579.15 | 1240.94 | 1390.86 | 1252.66 | 1711.42  | 462.33  |
| Tmx3     | thioredoxin-relat  | 81  | 4  | 124.19  | 500.88  | 144.72   | 58.96   | 2074.80 | 2496.34 | 273.23  | 25.86    | 1258.54 |
| Tmx4     | thioredoxin-relat  | 2   | 1  | 0.03    | 14.63   | 0.04     | 0.02    | 34.89   | 12.58   | 0.02    | 0.02     | 62.55   |
| Tnfsf4   | tumor necrosis fa  | 15  | 2  | 54.46   | 46.74   | 33.85    | 0.02    | 145.22  | 122.32  | 31.95   | 42.94    | 420.28  |
| Tnni3k   | TNNI3 interactin   | 1   | 1  | 0.03    | 0.04    | 0.04     | 0.02    | 0.03    | 0.02    | 0.02    | 0.02     | 873.30  |
| Tomm22   | translocase of ou  | 36  | 1  | 508.63  | 172.81  | 23.27    | 48.03   | 11.15   | 185.56  | 288.48  | 303.06   | 0.11    |
| Tomm40   | translocase of ou  | 1   | 1  | 0.03    | 12.88   | 42.92    | 145.24  | 0.03    | 0.02    | 0.02    | 0.02     | 1075.85 |
| Tomm70a  | translocase of ou  | 3   | 3  | 9.34    | 49.04   | 336.77   | 37.48   | 1.54    | 0.02    | 0.02    | 0.21     | 401.37  |
| Top1     | topoisomerase (I   | 33  | 4  | 50.37   | 22.38   | 10.56    | 5.52    | 512.59  | 395.32  | 74.13   | 32.21    | 10.11   |
| Top2a    | topoisomerase (I   | 20  | 4  | 1588.34 | 694.90  | 397.17   | 54.14   | 1462.74 | 1109.15 | 758.71  | 536.99   | 294.55  |
| Tor1aip1 | torsin A interacti | 26  | 4  | 802.87  | 1977.75 | 2291.98  | 94.40   | 319.34  | 631.13  | 181.81  | 32.89    | 168.95  |
| Tpd52    | tumor protein D5   | 4   | 1  | 61.97   | 50.60   | 7682.05  | 367.11  | 303.76  | 283.78  | 152.80  | 153.17   | 379.72  |
| Tpi1     | triosephosphate    | 101 | 6  | 3331.16 | 1885.66 | 6976.18  | 1732.09 | 7810.45 | 6569.36 | 1878.76 | 2142.17  | 1027.38 |
| Tpm2     | tropomyosin 2, b   | 2   | 1  | 10.42   | 162.53  | 116.06   | 11.27   | 43.37   | 2.32    | 54.54   | 107.58   | 71.38   |

|         |                      |     |    |          |          |         |          |          |          |          |          |          |
|---------|----------------------|-----|----|----------|----------|---------|----------|----------|----------|----------|----------|----------|
| Tpm4    | tropomyosin 4 G      | 12  | 2  | 244.94   | 382.42   | 95.50   | 75.35    | 12.46    | 20.40    | 55.12    | 41.56    | 439.26   |
| Tpr     | translocated pro     | 9   | 6  | 3316.12  | 6489.53  | 3322.14 | 587.04   | 1571.67  | 1201.19  | 1300.01  | 1036.85  | 26.08    |
| Tpt1    | tumor protein, tr    | 55  | 3  | 662.73   | 476.85   | 4353.74 | 292.45   | 1125.68  | 1440.40  | 330.81   | 654.46   | 523.14   |
| Trap1   | TNF receptor-as      | 70  | 6  | 361.27   | 369.45   | 138.24  | 98.30    | 1232.33  | 1061.36  | 518.87   | 828.39   | 1009.50  |
| Trim26  | tripartite motif-cc  | 388 | 1  | 268.94   | 549.56   | 638.18  | 366.83   | 312.65   | 327.09   | 116.78   | 136.05   | 509.26   |
| Trim28  | tripartite motif-cc  | 6   | 1  | 79.84    | 76.20    | 0.04    | 0.02     | 667.28   | 818.28   | 454.93   | 429.29   | 0.11     |
| Trim58  | tripartite motif-cc  | 2   | 2  | 240.85   | 37.18    | 212.85  | 7.94     | 230.96   | 309.02   | 75.27    | 9.35     | 0.11     |
| Trpc3   | transient receptc    | 8   | 8  | 163.93   | 334.19   | 737.96  | 54.09    | 10.35    | 5.51     | 1.20     | 0.02     | 17.84    |
| Tsfm    | Ts translation ek    | 2   | 1  | 156.82   | 79.39    | 0.04    | 71.88    | 250.46   | 187.50   | 45.96    | 59.29    | 0.11     |
| Tspo    | translocator prot    | 82  | 3  | 648.28   | 90.09    | 0.04    | 59.99    | 272.86   | 723.22   | 3349.00  | 2166.96  | 935.86   |
| Ttc5    | tetratricopeptide    | 10  | 9  | 293.03   | 24.67    | 246.76  | 445.92   | 416.02   | 851.83   | 291.13   | 105.19   | 542.24   |
| Ttc7b   | tetratricopeptide    | 1   | 1  | 15.78    | 0.04     | 0.04    | 13.61    | 3.09     | 0.02     | 0.02     | 0.02     | 12.39    |
| Tuba1a  | tubulin, alpha 1A    | 10  | 2  | 473.80   | 23.34    | 79.35   | 69.91    | 98.40    | 36.60    | 523.57   | 604.00   | 868.16   |
| Tuba1b  | tubulin, alpha 1B    | 560 | 12 | 7508.42  | 6302.29  | 2922.21 | 7434.54  | 14218.82 | 13700.83 | 10935.45 | 10106.31 | 4415.42  |
| Tubb1   | tubulin, beta 1 G    | 1   | 1  | 0.03     | 1.32     | 0.04    | 21.57    | 0.03     | 0.02     | 0.02     | 0.02     | 65.39    |
| Tubb2a  | tubulin, beta 2A     | 4   | 2  | 1.45     | 33.90    | 40.23   | 21.78    | 37.54    | 4.46     | 21.47    | 15.80    | 233.21   |
| Tubb2c  | tubulin, beta 2C     | 13  | 4  | 15.49    | 475.83   | 1983.87 | 50.70    | 26.70    | 8.61     | 33.53    | 35.19    | 4039.66  |
| Tubb3   | tubulin, beta 3 G    | 6   | 3  | 10.77    | 41.44    | 132.18  | 24.61    | 87.48    | 82.54    | 0.02     | 5.16     | 637.98   |
| Tubb4   | tubulin, beta 4 G    | 91  | 5  | 1964.28  | 3045.06  | 549.82  | 693.71   | 4206.92  | 3443.78  | 1572.71  | 1799.86  | 2161.85  |
| Tubb5   | tubulin, beta 5 G    | 696 | 20 | 16360.24 | 22803.73 | 8298.01 | 11907.68 | 12576.05 | 11424.50 | 8189.86  | 8442.19  | 20613.90 |
| Tubb6   | tubulin, beta 6 G    | 17  | 3  | 764.43   | 414.39   | 434.39  | 311.84   | 274.37   | 155.53   | 490.67   | 505.75   | 1.57     |
| Tufm    | Tu translation ek    | 75  | 6  | 3293.95  | 874.76   | 326.73  | 967.06   | 3635.62  | 2868.44  | 3674.60  | 4347.26  | 145.15   |
| Twf1    | twinfilin, actin-bir | 4   | 4  | 4.93     | 8.86     | 3.41    | 313.74   | 7.40     | 114.28   | 80.32    | 135.26   | 752.87   |
| Txndc5  | thioredoxin doma     | 12  | 2  | 0.03     | 5.24     | 0.04    | 44.04    | 226.47   | 187.69   | 0.02     | 0.02     | 52.46    |
| Txn1l1  | thioredoxin-like 1   | 13  | 1  | 0.03     | 0.04     | 0.04    | 0.02     | 0.03     | 17.89    | 240.10   | 306.04   | 3.77     |
| Txnrd1  | thioredoxin reduc    | 9   | 4  | 250.91   | 190.03   | 597.30  | 1332.31  | 270.25   | 267.79   | 184.47   | 186.48   | 1387.06  |
| U2af2   | U2 small nuclear     | 28  | 2  | 276.12   | 189.92   | 212.79  | 247.18   | 817.16   | 772.85   | 303.15   | 280.34   | 240.48   |
| Uba1    | ubiquitin-like mo    | 73  | 9  | 8923.67  | 5564.91  | 5930.84 | 3069.86  | 2948.18  | 2005.86  | 5348.17  | 4735.42  | 212.10   |
| Ube2l3  | ubiquitin-conjuga    | 19  | 2  | 30.58    | 57.28    | 139.82  | 580.21   | 27.44    | 0.02     | 63.75    | 272.22   | 12.61    |
| Uggt1   | UDP-glucose gly      | 2   | 2  | 48.42    | 0.04     | 1291.30 | 34.57    | 0.03     | 7.70     | 0.02     | 0.02     | 0.11     |
| Ugt1a1  | UDP glucuronos       | 50  | 4  | 387.63   | 982.01   | 2762.74 | 312.15   | 227.58   | 308.57   | 421.13   | 365.89   | 715.68   |
| Ugt8a   | UDP galactosyltr     | 1   | 1  | 0.03     | 0.04     | 0.30    | 0.02     | 0.03     | 0.02     | 0.02     | 0.02     | 0.11     |
| Unc93b1 | unc-93 homolog       | 13  | 3  | 299.47   | 760.34   | 2304.30 | 556.59   | 6.24     | 22.69    | 184.51   | 252.50   | 848.27   |
| Uprt    | uracil phosphorit    | 11  | 2  | 473.08   | 237.38   | 0.04    | 26.74    | 311.36   | 259.17   | 207.12   | 190.59   | 0.11     |
| Uqcrb   | ubiquinol-cytochl    | 26  | 2  | 42.58    | 30.22    | 0.04    | 15.07    | 245.72   | 153.15   | 34.93    | 45.01    | 9.46     |
| Uqcrc1  | ubiquinol-cytochl    | 19  | 3  | 1297.55  | 543.24   | 235.65  | 200.40   | 120.02   | 113.44   | 1780.89  | 1330.74  | 52.21    |
| Uqcrc2  | ubiquinol cytochl    | 98  | 5  | 1708.39  | 1304.05  | 527.62  | 1374.75  | 1917.22  | 1523.92  | 2017.55  | 2262.50  | 471.84   |

|          |                    |      |    |         |         |         |         |          |         |          |          |         |
|----------|--------------------|------|----|---------|---------|---------|---------|----------|---------|----------|----------|---------|
| Uqcrfs1  | ubiquinol-cytochr  | 7    | 4  | 1066.56 | 38.91   | 93.93   | 581.36  | 310.58   | 213.81  | 66.07    | 24.60    | 68.56   |
| Uqcrq    | ubiquinol-cytochr  | 3    | 1  | 1119.30 | 1593.06 | 0.04    | 78.68   | 842.82   | 214.47  | 0.02     | 11.47    | 193.99  |
| Usp14    | ubiquitin specific | 1    | 1  | 0.03    | 7.08    | 0.04    | 0.02    | 0.03     | 17.87   | 9.44     | 0.02     | 0.11    |
| Usp25    | ubiquitin specific | 17   | 2  | 1198.91 | 356.71  | 8.33    | 269.51  | 295.37   | 809.65  | 660.11   | 611.55   | 26.90   |
| Usp8     | ubiquitin specific | 4    | 1  | 519.41  | 455.68  | 12.86   | 105.83  | 441.46   | 385.35  | 287.49   | 375.33   | 0.11    |
| Vamp2    | vesicle-associat   | 1    | 1  | 570.67  | 651.04  | 21.58   | 53.53   | 205.70   | 59.13   | 0.02     | 0.02     | 10.51   |
| Vapa     | vesicle-associat   | 55   | 5  | 933.44  | 254.84  | 125.26  | 173.20  | 1317.73  | 1556.26 | 1689.34  | 2078.43  | 1074.46 |
| Vapb     | vesicle-associat   | 1    | 1  | 4.13    | 1.52    | 1.45    | 0.05    | 2.51     | 4.80    | 0.96     | 2.11     | 7.21    |
| Vars     | valyl-tRNA synth   | 27   | 6  | 153.76  | 145.06  | 2.82    | 60.66   | 1301.74  | 747.11  | 939.41   | 977.01   | 1297.76 |
| Vat1     | vesicle amine tra  | 29   | 4  | 4467.39 | 5675.61 | 3170.54 | 2097.33 | 1689.21  | 1561.88 | 4061.77  | 4033.06  | 1395.05 |
| Vcp      | valosin containin  | 78   | 9  | 658.05  | 1824.51 | 7014.38 | 4832.63 | 1739.42  | 828.33  | 1462.82  | 1741.20  | 74.80   |
| Vdac1    | voltage-depende    | 234  | 14 | 9231.33 | 5747.21 | 308.45  | 3503.11 | 11432.53 | 6395.21 | 7098.64  | 7685.11  | 3122.37 |
| Vdac2    | voltage-depende    | 437  | 6  | 5024.86 | 4426.10 | 1013.29 | 1156.78 | 2310.59  | 2800.04 | 4354.43  | 4105.52  | 2744.07 |
| Vdac3    | voltage-depende    | 173  | 7  | 4909.52 | 4714.72 | 182.32  | 898.27  | 7517.56  | 7110.98 | 4808.17  | 5460.53  | 889.45  |
| Vgf      | VGF nerve grow     | 6    | 5  | 0.03    | 0.04    | 4.20    | 1.58    | 56.75    | 70.31   | 9.38     | 8.21     | 404.51  |
| Vim      | vimentin Gene      | 1345 | 20 | 9295.56 | 5537.94 | 2666.35 | 4103.02 | 7087.49  | 6011.97 | 14626.66 | 11533.23 | 8441.91 |
| Vkorc111 | vitamin K epoxid   | 1    | 1  | 0.03    | 0.04    | 0.04    | 0.02    | 0.03     | 0.02    | 0.02     | 0.02     | 0.11    |
| Vps26a   | vacuolar protein   | 11   | 2  | 505.02  | 52.73   | 0.04    | 2502.51 | 327.58   | 603.17  | 514.16   | 338.69   | 308.33  |
| Vps35    | vacuolar protein   | 43   | 3  | 196.74  | 137.39  | 355.56  | 210.33  | 344.27   | 270.73  | 919.62   | 683.19   | 435.24  |
| Vps41    | vacuolar protein   | 46   | 3  | 2451.82 | 3134.74 | 5121.32 | 5454.80 | 1341.46  | 1040.36 | 773.66   | 718.57   | 2859.09 |
| Vps4b    | vacuolar protein   | 3    | 1  | 0.03    | 1.73    | 0.04    | 279.02  | 0.03     | 2.97    | 11.63    | 0.02     | 28.70   |
| Vwa5a    | von Willebrand fa  | 9    | 2  | 986.14  | 1660.51 | 237.48  | 393.48  | 228.46   | 184.89  | 82.13    | 42.67    | 425.34  |
| Wars     | tryptophanyl-tRN   | 36   | 8  | 2363.74 | 1907.44 | 208.76  | 350.37  | 170.14   | 130.89  | 855.23   | 559.30   | 154.78  |
| Wdr1     | WD repeat domæ     | 5    | 3  | 1.12    | 0.09    | 1434.34 | 0.02    | 65.21    | 123.45  | 108.38   | 158.61   | 296.87  |
| Wdr72    | WD repeat domæ     | 2    | 2  | 6933.99 | 792.75  | 60.75   | 76.18   | 4313.00  | 4223.62 | 35.19    | 0.02     | 0.11    |
| Xpnpep1  | X-prolyl aminope   | 1    | 1  | 1902.04 | 2857.03 | 19.29   | 7670.04 | 5717.29  | 314.96  | 3.39     | 4.99     | 8.73    |
| Xylt2    | xylosyltransferas  | 4    | 1  | 139.89  | 0.04    | 3178.96 | 51.35   | 187.65   | 131.97  | 784.16   | 725.18   | 0.11    |
| Ybx1     | Y box protein 1 C  | 2    | 1  | 2.26    | 1.13    | 1.09    | 0.47    | 1.18     | 0.09    | 0.02     | 0.74     | 10.29   |
| Ywhab    | tyrosine 3-monox   | 5    | 3  | 8.66    | 36.78   | 1134.91 | 549.99  | 1.18     | 16.20   | 90.08    | 124.08   | 447.56  |
| Ywhae    | tyrosine 3-monox   | 36   | 5  | 1371.24 | 1185.07 | 1914.49 | 6570.33 | 2224.32  | 1003.69 | 382.87   | 403.88   | 151.92  |
| Ywhag    | tyrosine 3-monox   | 10   | 3  | 19.37   | 169.80  | 993.95  | 742.15  | 0.03     | 4.53    | 61.19    | 39.61    | 13.33   |
| Ywhaq    | tyrosine 3-monox   | 3    | 1  | 0.03    | 0.04    | 982.02  | 6.13    | 0.03     | 0.02    | 0.02     | 0.02     | 0.11    |
| Ywhaz    | tyrosine 3-monox   | 110  | 5  | 1268.10 | 883.57  | 1656.56 | 4464.15 | 2958.71  | 3005.88 | 2943.06  | 3254.36  | 2206.70 |
| Zdbf2    | zinc finger, DBF-  | 2    | 1  | 0.03    | 0.04    | 0.04    | 0.02    | 0.03     | 0.02    | 0.02     | 0.02     | 2742.04 |
| Zfp599   | zinc finger protei | 1    | 1  | 0.03    | 0.04    | 0.04    | 0.02    | 0.03     | 0.02    | 0.02     | 0.02     | 0.11    |
| Zfp800   | zinc finger protei | 1    | 1  | 7.08    | 8.10    | 21.46   | 7.76    | 2.23     | 1.52    | 0.65     | 1.53     | 0.11    |
| Zmpste24 | zinc metallopepti  | 18   | 3  | 23.41   | 55.78   | 3.18    | 0.02    | 25.74    | 13.62   | 44.10    | 176.48   | 0.11    |

|         |                   |     |   |         |         |        |         |        |        |        |        |         |
|---------|-------------------|-----|---|---------|---------|--------|---------|--------|--------|--------|--------|---------|
| Zscan10 | zinc finger and S | 1   | 1 | 1.54    | 5.88    | 4.94   | 0.02    | 0.03   | 0.79   | 0.55   | 0.02   | 0.11    |
| mt-Atp6 | mitochondrially e | 5   | 1 | 0.03    | 0.04    | 0.04   | 45.67   | 0.03   | 0.02   | 72.97  | 37.02  | 0.11    |
| mt-Co2  | mitochondrially e | 209 | 6 | 1627.78 | 2930.35 | 781.08 | 1017.59 | 441.36 | 461.98 | 622.54 | 551.61 | 2825.88 |

| MP-Rv2   | DC-BCG1  | DC-BCG2  | DC-KO1   | DC-KO2   | DC-Rv1   | DC-Rv2   |
|----------|----------|----------|----------|----------|----------|----------|
| 64.66    | 38.65    | 40.07    | 169.15   | 257.41   | 584.84   | 1372.00  |
| 0.05     | 0.10     | 0.09     | 0.03     | 0.03     | 0.04     | 0.04     |
| 75.81    | 1184.39  | 1083.46  | 114.68   | 25.59    | 46.04    | 0.16     |
| 367.07   | 0.10     | 7.02     | 13.45    | 20.93    | 65.92    | 0.04     |
| 0.05     | 0.10     | 0.09     | 0.03     | 0.03     | 0.04     | 0.04     |
| 25.83    | 99.11    | 20.53    | 7768.17  | 8703.48  | 16.20    | 180.82   |
| 16.60    | 0.10     | 0.99     | 17.63    | 22.57    | 41.47    | 102.15   |
| 70.85    | 34.43    | 0.09     | 0.03     | 0.03     | 1295.57  | 1082.72  |
| 41.61    | 147.53   | 70.13    | 5.43     | 54.23    | 173.80   | 287.85   |
| 44.04    | 0.10     | 13.17    | 2430.04  | 2603.31  | 47.82    | 0.04     |
| 300.20   | 202.65   | 166.23   | 33.25    | 31.58    | 26.69    | 8.24     |
| 1452.07  | 1299.31  | 1055.76  | 1568.45  | 1425.98  | 3334.01  | 3076.64  |
| 80.56    | 0.10     | 1.47     | 11.89    | 29.82    | 0.04     | 4.22     |
| 4.75     | 31.41    | 29.83    | 11.94    | 41.59    | 153.19   | 59.08    |
| 1322.16  | 2348.46  | 4845.42  | 2733.33  | 2635.82  | 758.82   | 456.72   |
| 41.19    | 0.10     | 0.09     | 9.27     | 4.32     | 42.06    | 0.04     |
| 862.98   | 141.08   | 90.73    | 21.77    | 29.02    | 51.41    | 38.79    |
| 0.05     | 0.10     | 0.09     | 17.55    | 0.03     | 29.47    | 0.04     |
| 1402.45  | 1233.75  | 1173.61  | 516.05   | 362.07   | 105.81   | 1.09     |
| 7248.63  | 21889.60 | 19705.61 | 542.22   | 414.46   | 4693.61  | 6336.25  |
| 1426.53  | 829.78   | 771.51   | 138.01   | 182.68   | 643.29   | 950.86   |
| 706.67   | 1267.47  | 1179.75  | 8.49     | 0.03     | 27.46    | 60.41    |
| 13.04    | 7.34     | 5.92     | 116.42   | 90.08    | 0.04     | 0.04     |
| 0.05     | 356.57   | 357.60   | 200.91   | 202.92   | 131.14   | 192.57   |
| 964.71   | 2244.43  | 1500.32  | 1133.77  | 1245.83  | 1332.40  | 2449.59  |
| 8960.18  | 22943.44 | 18753.75 | 6678.18  | 6000.34  | 13642.03 | 14677.98 |
| 0.05     | 1.76     | 0.09     | 0.03     | 0.03     | 1.50     | 3.27     |
| 184.44   | 259.32   | 128.68   | 302.66   | 629.70   | 43.27    | 0.04     |
| 0.05     | 0.10     | 0.09     | 2.70     | 4.24     | 1.86     | 2.74     |
| 28.77    | 3.34     | 0.09     | 7.85     | 14.28    | 20.34    | 0.04     |
| 60.40    | 154.03   | 137.99   | 84.93    | 245.77   | 132.73   | 212.02   |
| 0.05     | 1.54     | 0.09     | 9.86     | 0.03     | 0.04     | 0.04     |
| 2383.19  | 4331.51  | 4569.25  | 1832.36  | 1798.47  | 3027.42  | 3051.33  |
| 24977.12 | 14573.96 | 22092.28 | 15084.98 | 14195.07 | 18847.18 | 15536.00 |
| 13735.48 | 26009.80 | 19567.02 | 23087.22 | 21887.32 | 24789.57 | 35348.39 |
| 8019.87  | 326.65   | 313.98   | 753.19   | 867.24   | 2038.64  | 2348.55  |

|          |          |          |         |         |          |          |
|----------|----------|----------|---------|---------|----------|----------|
| 504.00   | 609.99   | 1034.97  | 4666.22 | 4000.41 | 915.24   | 244.73   |
| 0.05     | 0.10     | 0.09     | 0.92    | 0.03    | 4.75     | 13.16    |
| 1054.08  | 1490.54  | 2226.08  | 8244.73 | 8916.67 | 746.81   | 909.73   |
| 9.29     | 62.05    | 60.95    | 2881.70 | 2448.03 | 157.26   | 40.33    |
| 3.03     | 5.82     | 5.76     | 1.19    | 1.20    | 2.26     | 0.04     |
| 29.41    | 133.60   | 91.55    | 54.20   | 53.06   | 26.00    | 84.62    |
| 0.05     | 0.10     | 2.48     | 0.03    | 1.95    | 0.04     | 1.07     |
| 17710.99 | 11667.77 | 12827.00 | 3420.36 | 4188.08 | 1098.34  | 1105.22  |
| 443.13   | 184.40   | 57.58    | 0.03    | 7.02    | 0.04     | 0.04     |
| 0.05     | 0.10     | 0.09     | 0.03    | 0.03    | 0.04     | 27.04    |
| 490.09   | 3659.15  | 4214.41  | 4482.23 | 4172.20 | 1234.32  | 1033.44  |
| 4.50     | 0.74     | 3.50     | 0.14    | 0.04    | 4.35     | 0.60     |
| 0.05     | 0.10     | 0.09     | 671.78  | 808.64  | 0.04     | 0.04     |
| 2567.13  | 2717.74  | 3274.82  | 47.68   | 44.96   | 3127.12  | 5663.17  |
| 2.01     | 0.10     | 2.43     | 0.03    | 0.03    | 22.18    | 12.79    |
| 504.79   | 506.75   | 372.73   | 247.04  | 246.36  | 838.76   | 887.27   |
| 12.80    | 132.99   | 95.67    | 198.22  | 124.75  | 15.88    | 17.81    |
| 162.61   | 606.81   | 1044.57  | 143.08  | 160.74  | 484.73   | 617.16   |
| 1355.69  | 4030.02  | 4395.24  | 1205.22 | 1087.96 | 2238.71  | 1929.42  |
| 1131.15  | 7156.75  | 6896.89  | 8747.98 | 8412.06 | 4700.81  | 1422.72  |
| 435.44   | 913.30   | 1378.64  | 2044.27 | 2334.25 | 1314.04  | 2444.67  |
| 140.37   | 351.39   | 280.23   | 66.10   | 51.52   | 97.11    | 275.81   |
| 150.25   | 117.95   | 155.37   | 212.64  | 120.82  | 195.35   | 414.18   |
| 82.08    | 17.21    | 7.66     | 82.90   | 235.68  | 9.62     | 35.34    |
| 359.09   | 26.87    | 33.89    | 0.03    | 0.03    | 0.04     | 1.99     |
| 140.08   | 170.88   | 73.58    | 26.06   | 45.71   | 276.84   | 195.60   |
| 0.05     | 0.10     | 0.09     | 0.03    | 0.03    | 7.54     | 0.04     |
| 3925.95  | 911.27   | 1861.41  | 447.55  | 656.37  | 3241.95  | 3044.10  |
| 3332.62  | 1963.10  | 2829.43  | 5493.65 | 6615.41 | 21569.90 | 15595.21 |
| 1510.92  | 1244.22  | 1410.68  | 5007.86 | 4157.87 | 1650.66  | 392.89   |
| 4881.96  | 995.46   | 1390.17  | 2639.43 | 2509.55 | 3831.52  | 2889.32  |
| 0.05     | 0.10     | 0.59     | 4.19    | 0.03    | 25.69    | 8.21     |
| 373.54   | 694.26   | 757.70   | 100.58  | 55.90   | 550.86   | 617.12   |
| 191.51   | 355.22   | 114.54   | 495.39  | 272.70  | 1675.24  | 1614.01  |
| 0.05     | 0.10     | 0.09     | 0.03    | 16.55   | 58.73    | 17.96    |
| 0.05     | 0.10     | 0.09     | 0.03    | 0.03    | 0.04     | 0.04     |
| 483.62   | 520.92   | 466.08   | 635.80  | 648.94  | 10.49    | 29.36    |

|          |          |          |          |          |          |          |
|----------|----------|----------|----------|----------|----------|----------|
| 0.05     | 0.10     | 0.09     | 0.03     | 0.03     | 88.12    | 226.65   |
| 95.20    | 9.10     | 26.10    | 19.55    | 0.03     | 28.25    | 42.01    |
| 244.24   | 157.28   | 402.80   | 684.86   | 858.32   | 233.29   | 138.67   |
| 137.77   | 328.24   | 201.17   | 70.28    | 50.05    | 403.00   | 527.69   |
| 1618.05  | 947.96   | 913.75   | 104.26   | 171.37   | 117.02   | 650.95   |
| 4736.05  | 91.26    | 664.98   | 4906.07  | 5011.84  | 20411.69 | 12963.30 |
| 0.05     | 0.10     | 14.90    | 196.93   | 182.96   | 523.23   | 783.41   |
| 2.12     | 141.76   | 113.50   | 620.79   | 654.12   | 65.37    | 311.40   |
| 71.01    | 181.85   | 193.81   | 353.67   | 310.10   | 0.04     | 0.04     |
| 421.93   | 1731.04  | 1838.63  | 527.56   | 555.78   | 105.57   | 44.22    |
| 6.55     | 0.10     | 0.09     | 5.19     | 6.53     | 94.72    | 181.48   |
| 160.70   | 142.78   | 54.30    | 136.92   | 160.34   | 57.69    | 57.89    |
| 63.58    | 12.25    | 0.09     | 282.25   | 404.04   | 108.65   | 50.49    |
| 658.77   | 1575.01  | 1478.09  | 1564.74  | 1553.24  | 2277.99  | 1714.90  |
| 336.68   | 793.62   | 615.79   | 1958.76  | 2353.04  | 542.77   | 1024.96  |
| 69.21    | 0.10     | 147.61   | 59.91    | 88.03    | 437.78   | 509.10   |
| 148.66   | 15.06    | 5.69     | 11.05    | 5.28     | 11.02    | 10.32    |
| 540.63   | 474.43   | 497.64   | 168.01   | 127.02   | 230.03   | 258.87   |
| 333.95   | 295.90   | 258.47   | 758.10   | 790.07   | 275.70   | 502.53   |
| 17.56    | 3.44     | 0.27     | 6.86     | 4.93     | 161.37   | 183.73   |
| 903.14   | 161.19   | 40.78    | 474.95   | 345.13   | 482.04   | 501.49   |
| 607.05   | 2762.18  | 1848.53  | 1747.79  | 1556.52  | 825.32   | 200.83   |
| 0.19     | 0.10     | 0.09     | 0.03     | 0.03     | 0.04     | 0.04     |
| 102.41   | 887.78   | 884.14   | 1149.51  | 1219.89  | 843.40   | 1091.47  |
| 11.70    | 1.20     | 0.09     | 662.09   | 509.84   | 0.04     | 34.20    |
| 288.70   | 327.83   | 249.40   | 106.88   | 51.30    | 228.03   | 472.04   |
| 616.03   | 27.59    | 80.36    | 490.38   | 747.39   | 0.04     | 0.04     |
| 9556.66  | 5394.25  | 4651.90  | 6623.65  | 5470.01  | 8789.92  | 12946.06 |
| 65468.66 | 72370.07 | 68127.42 | 20493.32 | 18047.69 | 31539.20 | 10353.49 |
| 76.95    | 276.43   | 240.39   | 0.03     | 0.03     | 0.04     | 0.04     |
| 165.86   | 115.38   | 48.56    | 106.05   | 145.55   | 361.47   | 514.12   |
| 2389.00  | 2866.77  | 3943.43  | 928.17   | 796.32   | 823.74   | 715.43   |
| 721.99   | 1688.94  | 2859.39  | 783.97   | 801.86   | 29.27    | 9.02     |
| 387.83   | 86.38    | 228.86   | 4722.11  | 5089.32  | 221.12   | 175.18   |
| 0.05     | 0.10     | 11.70    | 0.03     | 0.03     | 0.04     | 0.04     |
| 717.63   | 3939.68  | 2167.58  | 825.30   | 999.87   | 6035.84  | 7181.58  |
| 127.71   | 242.67   | 181.14   | 319.36   | 274.68   | 33.83    | 13.59    |

|          |          |          |         |          |         |         |
|----------|----------|----------|---------|----------|---------|---------|
| 105.00   | 70.78    | 42.81    | 91.60   | 165.37   | 1843.81 | 1018.71 |
| 212.85   | 49.63    | 3.88     | 46.12   | 82.15    | 2.55    | 60.23   |
| 10.91    | 5.79     | 3.78     | 26.51   | 14.75    | 37.22   | 38.11   |
| 989.21   | 0.10     | 158.55   | 0.03    | 0.03     | 867.04  | 38.12   |
| 19.20    | 20.31    | 9.63     | 28.38   | 34.33    | 0.04    | 0.04    |
| 0.05     | 0.10     | 0.09     | 1.39    | 2.85     | 0.04    | 0.04    |
| 6.64     | 58.62    | 8.33     | 11.37   | 29.77    | 8.91    | 6.21    |
| 128.10   | 0.10     | 13.43    | 860.82  | 438.39   | 198.91  | 148.18  |
| 121.12   | 3.85     | 13.94    | 47.52   | 49.36    | 48.89   | 161.09  |
| 0.80     | 566.27   | 619.53   | 13.50   | 14.93    | 292.44  | 638.53  |
| 111.84   | 39.67    | 30.16    | 4.03    | 0.03     | 1074.62 | 606.86  |
| 5.80     | 8.70     | 7.46     | 4.36    | 0.03     | 46.07   | 9.18    |
| 30.40    | 4.73     | 0.09     | 0.03    | 2.02     | 0.04    | 8.24    |
| 36.25    | 0.10     | 3.04     | 48.44   | 34.61    | 1.73    | 5.63    |
| 12.16    | 0.10     | 45.40    | 0.03    | 0.03     | 0.04    | 4.29    |
| 0.05     | 0.10     | 0.09     | 44.86   | 1.14     | 0.04    | 2.01    |
| 31.18    | 10.91    | 7.64     | 4.05    | 3.77     | 6.34    | 0.04    |
| 19.50    | 12.18    | 1.39     | 242.09  | 223.64   | 66.22   | 72.33   |
| 1103.42  | 1383.33  | 1099.34  | 5499.34 | 6234.47  | 3154.56 | 6132.20 |
| 220.95   | 8.25     | 1.60     | 0.03    | 0.03     | 0.04    | 0.04    |
| 108.90   | 10.27    | 65.61    | 5343.32 | 3394.77  | 9.86    | 10.13   |
| 46286.65 | 23751.32 | 16920.95 | 9967.25 | 10718.27 | 6205.78 | 6055.10 |
| 3232.56  | 1414.23  | 2516.44  | 615.97  | 794.86   | 4219.00 | 4503.13 |
| 3174.46  | 736.97   | 1114.53  | 4876.82 | 5623.48  | 2998.12 | 1760.30 |
| 27.90    | 5.51     | 14.69    | 2544.54 | 2091.47  | 1645.11 | 2094.80 |
| 2340.24  | 4157.17  | 4920.30  | 8820.23 | 9934.38  | 399.22  | 86.74   |
| 78.13    | 63.28    | 41.47    | 54.96   | 8.23     | 18.95   | 0.04    |
| 2183.89  | 1995.25  | 3162.54  | 1508.49 | 1601.28  | 1751.93 | 2313.50 |
| 172.37   | 608.16   | 511.34   | 1720.15 | 1644.46  | 98.40   | 351.11  |
| 53.11    | 312.87   | 406.42   | 746.36  | 522.89   | 585.31  | 968.85  |
| 0.05     | 0.10     | 0.09     | 62.79   | 46.50    | 0.04    | 0.04    |
| 0.05     | 17.87    | 24.64    | 0.03    | 0.03     | 0.04    | 0.04    |
| 34.62    | 53.14    | 3.80     | 740.76  | 562.47   | 1331.49 | 6291.89 |
| 386.10   | 656.02   | 573.82   | 215.28  | 158.37   | 0.04    | 21.73   |
| 0.05     | 0.10     | 0.09     | 0.03    | 0.03     | 0.04    | 0.04    |
| 562.57   | 205.48   | 218.31   | 0.03    | 0.03     | 0.04    | 0.04    |
| 11074.18 | 164.97   | 991.27   | 0.03    | 0.03     | 3234.27 | 1118.29 |

|         |          |          |         |         |         |         |
|---------|----------|----------|---------|---------|---------|---------|
| 0.05    | 0.10     | 0.09     | 1040.89 | 1338.98 | 3733.74 | 2627.93 |
| 450.69  | 1503.63  | 1508.20  | 1895.61 | 1804.85 | 1983.25 | 1458.57 |
| 195.43  | 288.61   | 312.48   | 176.37  | 217.74  | 111.56  | 59.74   |
| 90.46   | 6.52     | 0.09     | 135.80  | 95.55   | 278.00  | 54.39   |
| 298.90  | 691.66   | 785.79   | 117.97  | 228.56  | 921.64  | 1217.66 |
| 3629.85 | 587.56   | 497.31   | 152.07  | 174.91  | 0.04    | 1.88    |
| 29.47   | 207.86   | 177.05   | 1291.92 | 1150.86 | 91.69   | 75.55   |
| 166.43  | 24.87    | 12.13    | 887.42  | 618.37  | 34.98   | 26.23   |
| 1383.49 | 526.22   | 534.29   | 395.15  | 499.62  | 355.04  | 547.35  |
| 0.05    | 108.37   | 84.35    | 0.03    | 0.03    | 34.04   | 51.49   |
| 0.05    | 0.10     | 0.09     | 0.03    | 0.03    | 0.04    | 0.04    |
| 95.51   | 85.34    | 61.48    | 122.49  | 90.41   | 0.04    | 0.04    |
| 363.19  | 2804.19  | 2035.00  | 2135.90 | 1255.67 | 344.16  | 597.85  |
| 639.27  | 813.77   | 453.56   | 75.01   | 92.31   | 446.32  | 501.65  |
| 682.14  | 471.36   | 297.53   | 151.09  | 142.39  | 751.53  | 1224.69 |
| 221.66  | 15.08    | 0.09     | 234.51  | 166.24  | 604.38  | 64.88   |
| 0.05    | 3.40     | 0.09     | 1.37    | 0.03    | 1.85    | 14.95   |
| 43.09   | 33.36    | 12.83    | 15.54   | 9.13    | 46.51   | 114.27  |
| 3338.03 | 7875.51  | 7220.18  | 2776.18 | 2429.04 | 3474.57 | 3710.66 |
| 0.05    | 89.57    | 21.26    | 286.68  | 212.43  | 0.04    | 36.09   |
| 330.98  | 0.10     | 0.09     | 311.47  | 309.76  | 1402.57 | 1759.77 |
| 11.59   | 106.21   | 67.92    | 14.84   | 7.35    | 0.04    | 0.04    |
| 70.40   | 141.43   | 131.97   | 331.56  | 291.42  | 12.76   | 131.72  |
| 1553.21 | 1107.09  | 1053.71  | 2607.79 | 3013.70 | 2590.03 | 757.05  |
| 8.22    | 0.10     | 0.09     | 0.03    | 0.03    | 0.04    | 0.04    |
| 0.05    | 0.10     | 0.09     | 0.03    | 0.03    | 11.00   | 13.80   |
| 147.03  | 584.66   | 429.29   | 158.77  | 212.09  | 763.88  | 1370.26 |
| 632.83  | 553.99   | 284.58   | 41.31   | 76.73   | 0.04    | 0.04    |
| 0.05    | 3.04     | 0.09     | 0.03    | 0.03    | 0.04    | 0.04    |
| 17.75   | 2.50     | 9.91     | 38.66   | 28.21   | 72.81   | 113.43  |
| 0.05    | 18.39    | 15.63    | 39.38   | 24.92   | 4.43    | 17.04   |
| 6.58    | 8.83     | 0.09     | 179.05  | 343.22  | 0.89    | 9.48    |
| 0.05    | 0.10     | 0.09     | 0.03    | 0.03    | 0.04    | 0.04    |
| 0.05    | 356.88   | 365.95   | 41.98   | 72.04   | 85.38   | 56.12   |
| 1120.92 | 2929.08  | 4390.92  | 1776.05 | 1679.58 | 1981.40 | 1545.99 |
| 6193.27 | 12750.56 | 11444.49 | 3762.69 | 3966.07 | 9539.99 | 7116.01 |
| 2496.24 | 1043.34  | 2626.73  | 1330.83 | 1294.48 | 3413.31 | 2897.00 |

|         |         |         |         |         |         |         |
|---------|---------|---------|---------|---------|---------|---------|
| 42.10   | 25.44   | 140.68  | 48.26   | 76.12   | 104.85  | 45.49   |
| 1036.55 | 1811.08 | 2703.10 | 102.08  | 33.98   | 0.04    | 0.04    |
| 0.05    | 0.10    | 0.09    | 0.03    | 0.03    | 247.33  | 24.57   |
| 71.94   | 92.71   | 32.96   | 126.44  | 48.01   | 56.80   | 10.74   |
| 0.05    | 0.10    | 0.09    | 0.03    | 0.03    | 0.04    | 0.04    |
| 871.90  | 1290.72 | 2675.00 | 6841.85 | 6584.20 | 268.52  | 181.15  |
| 283.12  | 718.43  | 357.22  | 15.99   | 61.58   | 0.04    | 0.04    |
| 0.05    | 0.10    | 0.09    | 0.03    | 0.03    | 1.90    | 32.71   |
| 116.72  | 86.52   | 95.68   | 33.82   | 24.20   | 141.16  | 239.47  |
| 0.05    | 0.10    | 0.09    | 0.03    | 0.03    | 0.04    | 0.04    |
| 0.05    | 0.10    | 31.20   | 117.41  | 110.64  | 24.71   | 59.44   |
| 5.40    | 8.98    | 21.71   | 17.79   | 10.48   | 0.04    | 0.04    |
| 13.66   | 17.01   | 0.96    | 9.32    | 0.03    | 0.04    | 0.04    |
| 1.38    | 0.10    | 0.61    | 1.65    | 2.75    | 319.99  | 753.63  |
| 2480.11 | 914.27  | 1014.42 | 211.43  | 165.12  | 2169.38 | 2223.62 |
| 14.93   | 81.76   | 69.86   | 1128.38 | 1662.57 | 18.41   | 0.04    |
| 12.47   | 0.44    | 3.69    | 35.41   | 42.83   | 70.06   | 108.37  |
| 807.02  | 92.64   | 8.61    | 748.37  | 711.03  | 1613.17 | 1882.74 |
| 87.18   | 0.10    | 0.09    | 4.73    | 6.80    | 0.04    | 0.04    |
| 668.11  | 574.87  | 364.99  | 0.03    | 0.03    | 0.04    | 0.04    |
| 0.05    | 0.10    | 0.09    | 216.33  | 90.01   | 0.04    | 0.04    |
| 42.10   | 50.09   | 73.73   | 627.23  | 576.82  | 0.04    | 0.04    |
| 741.11  | 253.50  | 95.08   | 12.52   | 25.85   | 812.88  | 424.75  |
| 0.05    | 0.10    | 0.09    | 0.03    | 0.03    | 0.55    | 0.04    |
| 2.27    | 0.10    | 3.25    | 0.03    | 2.73    | 1.10    | 5.25    |
| 199.36  | 261.39  | 500.79  | 253.66  | 413.30  | 145.44  | 313.95  |
| 103.35  | 1185.07 | 757.87  | 2334.79 | 1408.59 | 14.74   | 0.04    |
| 88.41   | 4.58    | 0.09    | 0.03    | 4.74    | 0.34    | 0.04    |
| 75.89   | 0.10    | 0.09    | 2.41    | 0.03    | 0.04    | 2.20    |
| 1391.24 | 348.98  | 492.80  | 1070.65 | 1218.05 | 1601.81 | 2980.22 |
| 96.36   | 0.10    | 0.09    | 68.17   | 263.69  | 24.34   | 157.06  |
| 41.36   | 26.44   | 47.33   | 6.96    | 5.61    | 10.49   | 2.83    |
| 624.05  | 126.58  | 104.06  | 291.20  | 354.63  | 773.63  | 547.47  |
| 0.05    | 22.45   | 0.09    | 93.50   | 54.02   | 0.04    | 0.04    |
| 311.37  | 248.69  | 396.82  | 2021.90 | 1723.43 | 231.64  | 362.65  |
| 2345.35 | 172.47  | 382.04  | 502.66  | 758.39  | 1451.72 | 643.05  |
| 178.19  | 474.90  | 313.46  | 63.72   | 6.09    | 291.19  | 688.36  |

|         |         |         |          |          |         |          |
|---------|---------|---------|----------|----------|---------|----------|
| 284.97  | 242.00  | 113.72  | 95.48    | 109.22   | 475.59  | 609.57   |
| 0.05    | 1.86    | 0.09    | 0.03     | 0.03     | 0.04    | 0.04     |
| 5.20    | 0.10    | 0.09    | 1.82     | 0.03     | 0.04    | 0.04     |
| 451.13  | 69.91   | 118.94  | 917.40   | 942.78   | 199.32  | 109.36   |
| 138.20  | 0.10    | 8.10    | 141.79   | 271.25   | 11.02   | 0.04     |
| 91.92   | 1224.93 | 1301.83 | 2557.51  | 2510.98  | 2215.13 | 2933.89  |
| 1515.29 | 1714.58 | 1526.15 | 299.52   | 393.51   | 425.54  | 278.60   |
| 222.94  | 614.65  | 555.64  | 2784.76  | 2930.62  | 138.05  | 150.34   |
| 1936.88 | 1505.95 | 830.08  | 358.31   | 391.35   | 130.09  | 28.13    |
| 1531.60 | 2046.92 | 2559.50 | 514.75   | 430.38   | 1157.08 | 1336.42  |
| 9.43    | 0.10    | 0.09    | 29.81    | 0.03     | 0.04    | 0.04     |
| 0.05    | 2751.71 | 1864.47 | 513.98   | 712.25   | 0.04    | 0.04     |
| 0.05    | 0.10    | 0.09    | 0.03     | 0.03     | 0.04    | 0.04     |
| 225.94  | 1287.30 | 1284.19 | 30.05    | 57.46    | 235.18  | 379.88   |
| 91.90   | 292.06  | 290.82  | 817.06   | 764.53   | 311.83  | 302.13   |
| 648.16  | 389.30  | 577.33  | 191.76   | 191.09   | 358.36  | 278.46   |
| 328.89  | 6.14    | 39.99   | 1949.03  | 1804.82  | 750.15  | 0.04     |
| 0.05    | 0.10    | 0.09    | 0.03     | 0.03     | 0.04    | 0.04     |
| 162.33  | 1015.93 | 571.66  | 811.53   | 760.48   | 48.07   | 0.53     |
| 0.05    | 0.10    | 0.09    | 0.03     | 0.03     | 0.04    | 0.04     |
| 4379.86 | 5387.44 | 4504.47 | 4736.70  | 4084.51  | 7408.16 | 10834.44 |
| 0.05    | 0.10    | 0.09    | 0.03     | 0.03     | 0.38    | 0.04     |
| 1191.01 | 2136.58 | 1883.21 | 16211.80 | 14080.51 | 3925.77 | 3353.08  |
| 656.62  | 2456.84 | 1912.01 | 2831.13  | 3623.53  | 593.47  | 461.72   |
| 312.48  | 127.34  | 224.67  | 987.24   | 564.51   | 1166.22 | 2410.29  |
| 7.74    | 810.57  | 561.66  | 1479.35  | 1149.78  | 2.24    | 1.90     |
| 73.96   | 500.05  | 328.26  | 1689.89  | 1739.28  | 473.91  | 169.73   |
| 0.05    | 0.10    | 0.09    | 0.03     | 0.03     | 0.04    | 0.04     |
| 283.23  | 614.66  | 556.14  | 969.06   | 1009.46  | 355.78  | 101.61   |
| 21.15   | 90.23   | 47.06   | 7.12     | 6.11     | 24.77   | 0.04     |
| 33.80   | 3389.71 | 2291.39 | 11.99    | 41.44    | 211.20  | 63.35    |
| 222.83  | 51.09   | 30.72   | 487.96   | 576.09   | 274.57  | 284.14   |
| 828.22  | 129.89  | 390.40  | 82.05    | 139.93   | 975.39  | 841.40   |
| 3091.75 | 2228.86 | 2903.41 | 75.57    | 17.22    | 3307.79 | 4801.20  |
| 522.76  | 282.86  | 516.25  | 0.03     | 0.03     | 0.04    | 0.04     |
| 0.05    | 22.20   | 23.10   | 0.03     | 27.34    | 6.07    | 22.61    |
| 0.05    | 0.10    | 0.09    | 0.03     | 4.90     | 101.79  | 303.78   |

|         |         |         |         |         |         |         |
|---------|---------|---------|---------|---------|---------|---------|
| 385.23  | 172.74  | 75.46   | 210.21  | 183.97  | 76.50   | 18.70   |
| 20.52   | 0.10    | 0.09    | 0.03    | 0.03    | 623.99  | 1009.93 |
| 0.05    | 0.10    | 0.09    | 3.09    | 0.03    | 3.33    | 2.41    |
| 2454.05 | 595.30  | 302.89  | 5714.44 | 6319.43 | 1634.97 | 2495.05 |
| 197.89  | 0.10    | 0.09    | 63.57   | 35.40   | 479.98  | 384.26  |
| 665.38  | 1372.26 | 1141.70 | 58.85   | 50.69   | 678.22  | 1152.86 |
| 2.98    | 4.10    | 14.80   | 35.27   | 7.08    | 299.34  | 175.08  |
| 0.05    | 0.10    | 0.09    | 577.63  | 576.07  | 0.04    | 0.04    |
| 15.67   | 21.68   | 5.01    | 8.01    | 14.39   | 32.53   | 31.52   |
| 48.39   | 22.74   | 86.21   | 64.81   | 30.30   | 300.88  | 278.69  |
| 407.73  | 402.63  | 340.75  | 127.60  | 130.02  | 853.19  | 1462.06 |
| 114.79  | 33.18   | 24.14   | 53.76   | 81.68   | 0.16    | 0.65    |
| 1347.11 | 49.23   | 196.61  | 0.03    | 0.03    | 252.36  | 366.57  |
| 1427.19 | 969.44  | 754.32  | 587.20  | 546.08  | 1158.95 | 509.83  |
| 361.04  | 329.63  | 310.70  | 765.10  | 762.31  | 2702.64 | 2555.97 |
| 0.05    | 0.10    | 0.09    | 0.03    | 2.11    | 0.04    | 0.04    |
| 5636.30 | 585.11  | 456.50  | 104.83  | 111.80  | 974.48  | 1815.59 |
| 0.05    | 0.10    | 9.71    | 352.53  | 363.07  | 0.04    | 0.04    |
| 0.05    | 0.10    | 0.09    | 0.03    | 2.22    | 0.04    | 0.04    |
| 100.44  | 0.10    | 0.09    | 80.66   | 84.15   | 9.13    | 118.39  |
| 3031.25 | 1468.84 | 1506.20 | 2420.29 | 2633.92 | 1132.56 | 660.81  |
| 71.58   | 77.58   | 40.31   | 104.68  | 226.80  | 342.18  | 144.32  |
| 521.28  | 623.78  | 261.73  | 145.15  | 240.41  | 168.26  | 204.92  |
| 0.05    | 3.81    | 0.09    | 0.03    | 0.03    | 0.04    | 0.04    |
| 111.10  | 91.84   | 139.58  | 2642.73 | 2718.16 | 217.25  | 156.47  |
| 536.58  | 805.84  | 589.44  | 19.02   | 10.30   | 125.52  | 111.65  |
| 0.05    | 0.10    | 0.09    | 0.03    | 0.03    | 0.58    | 0.04    |
| 114.27  | 11.84   | 5.18    | 1050.33 | 925.60  | 1136.51 | 70.57   |
| 172.06  | 168.36  | 146.97  | 174.41  | 181.87  | 357.65  | 335.76  |
| 0.05    | 0.10    | 4.34    | 4.86    | 5.97    | 0.04    | 0.04    |
| 268.31  | 234.22  | 580.60  | 407.53  | 391.45  | 204.46  | 26.85   |
| 0.05    | 0.10    | 16.23   | 0.77    | 0.90    | 31.93   | 1.21    |
| 0.05    | 3.85    | 1.60    | 0.03    | 0.03    | 0.04    | 18.49   |
| 350.76  | 284.45  | 224.88  | 6.98    | 39.51   | 7.86    | 7.30    |
| 454.86  | 1041.72 | 855.58  | 612.37  | 586.09  | 528.60  | 613.73  |
| 384.33  | 1066.71 | 820.67  | 1073.24 | 520.80  | 130.82  | 60.76   |
| 920.32  | 8.51    | 125.31  | 246.29  | 310.38  | 2136.47 | 1994.01 |

|         |         |         |         |         |         |         |
|---------|---------|---------|---------|---------|---------|---------|
| 612.47  | 292.51  | 301.49  | 4880.70 | 6254.68 | 575.69  | 322.75  |
| 14.35   | 23.44   | 24.30   | 43.84   | 38.58   | 104.92  | 103.36  |
| 236.24  | 74.51   | 214.68  | 1600.49 | 1483.68 | 2170.05 | 2144.61 |
| 0.05    | 0.10    | 0.09    | 25.74   | 5.75    | 0.04    | 0.04    |
| 15.04   | 0.10    | 0.09    | 4.02    | 4.62    | 0.04    | 0.04    |
| 165.12  | 1083.81 | 936.23  | 231.70  | 284.68  | 498.10  | 346.05  |
| 57.98   | 20.85   | 21.82   | 13.63   | 3.15    | 28.36   | 31.75   |
| 0.05    | 0.10    | 0.09    | 87.74   | 20.09   | 14.19   | 56.49   |
| 1570.88 | 6947.40 | 5020.11 | 1137.69 | 1588.39 | 1812.47 | 2374.69 |
| 1164.01 | 4416.72 | 4500.03 | 2306.99 | 2837.36 | 3599.62 | 4804.84 |
| 1065.74 | 2585.54 | 2516.84 | 952.96  | 772.51  | 1717.26 | 1064.62 |
| 6.97    | 789.87  | 897.62  | 57.81   | 110.66  | 2.41    | 3.60    |
| 57.39   | 481.26  | 366.05  | 97.30   | 170.51  | 212.30  | 180.53  |
| 27.82   | 2.93    | 18.83   | 12.13   | 13.69   | 41.80   | 30.77   |
| 0.05    | 0.10    | 0.09    | 0.03    | 0.03    | 0.04    | 0.04    |
| 1831.04 | 499.38  | 523.01  | 823.32  | 455.38  | 454.05  | 148.63  |
| 87.94   | 382.42  | 520.14  | 252.83  | 533.89  | 53.55   | 91.29   |
| 10.94   | 2.92    | 29.73   | 64.09   | 7.10    | 68.17   | 29.04   |
| 0.05    | 0.10    | 0.09    | 66.71   | 52.80   | 0.04    | 0.04    |
| 251.87  | 62.91   | 21.54   | 1222.26 | 969.80  | 199.72  | 330.86  |
| 15.00   | 9.68    | 0.09    | 0.34    | 4.79    | 13.60   | 0.04    |
| 429.27  | 165.99  | 157.18  | 146.41  | 540.32  | 53.04   | 0.58    |
| 75.32   | 1363.15 | 1553.34 | 346.80  | 362.48  | 713.12  | 830.51  |
| 0.05    | 0.10    | 0.09    | 389.62  | 381.25  | 155.58  | 0.04    |
| 701.47  | 153.53  | 128.17  | 0.03    | 2.50    | 0.04    | 0.04    |
| 256.37  | 0.10    | 0.09    | 171.05  | 317.87  | 30.60   | 5.15    |
| 0.05    | 0.10    | 0.65    | 7.96    | 7.50    | 0.71    | 0.04    |
| 3819.34 | 5558.43 | 5644.13 | 632.46  | 671.95  | 83.46   | 111.97  |
| 432.17  | 76.65   | 75.01   | 737.33  | 892.79  | 102.70  | 106.16  |
| 385.20  | 269.39  | 135.08  | 65.67   | 64.93   | 223.96  | 305.73  |
| 2910.58 | 4991.97 | 5804.00 | 5583.02 | 6505.62 | 2922.34 | 954.05  |
| 12.43   | 21.55   | 6.52    | 9.68    | 18.52   | 37.50   | 16.67   |
| 1050.25 | 61.90   | 37.42   | 60.59   | 56.64   | 124.93  | 809.62  |
| 0.05    | 0.10    | 0.09    | 0.03    | 0.03    | 0.04    | 11.19   |
| 54.56   | 144.90  | 168.58  | 60.43   | 52.76   | 0.04    | 0.04    |
| 293.85  | 95.44   | 98.51   | 75.86   | 87.23   | 0.04    | 0.04    |
| 7.35    | 2.36    | 0.09    | 14.08   | 4.58    | 15.27   | 21.29   |

|         |         |         |         |         |          |         |
|---------|---------|---------|---------|---------|----------|---------|
| 203.75  | 27.43   | 519.65  | 2904.15 | 3267.50 | 0.04     | 0.04    |
| 0.05    | 0.10    | 0.09    | 514.25  | 977.44  | 73.70    | 0.04    |
| 617.50  | 511.27  | 483.19  | 3238.71 | 4372.58 | 10858.04 | 7294.67 |
| 16.52   | 153.50  | 660.95  | 433.80  | 419.50  | 577.68   | 1370.12 |
| 8.02    | 12.45   | 0.09    | 0.03    | 0.03    | 0.55     | 0.04    |
| 1862.10 | 715.09  | 721.49  | 6743.16 | 6650.12 | 565.09   | 480.48  |
| 0.05    | 0.10    | 0.09    | 742.68  | 1151.79 | 0.04     | 0.04    |
| 71.07   | 61.19   | 18.34   | 1542.59 | 1404.42 | 125.22   | 72.43   |
| 26.81   | 31.16   | 40.05   | 57.41   | 48.07   | 268.39   | 181.83  |
| 126.21  | 586.57  | 381.89  | 310.30  | 201.85  | 0.04     | 6.04    |
| 561.10  | 34.85   | 28.11   | 0.03    | 10.56   | 4.58     | 0.04    |
| 317.05  | 19.06   | 14.10   | 620.76  | 888.02  | 12.02    | 20.31   |
| 276.21  | 22.98   | 89.21   | 1469.46 | 1305.01 | 462.23   | 266.69  |
| 11.13   | 170.96  | 76.29   | 417.82  | 384.09  | 561.70   | 146.00  |
| 4.23    | 44.53   | 9.17    | 2.36    | 0.04    | 4.85     | 171.67  |
| 287.22  | 0.10    | 0.09    | 14.66   | 12.42   | 38.37    | 34.62   |
| 1191.23 | 1585.87 | 1007.19 | 1129.56 | 1586.43 | 457.32   | 581.62  |
| 0.05    | 0.10    | 0.09    | 0.03    | 0.03    | 0.04     | 2.79    |
| 732.26  | 1184.23 | 904.39  | 725.50  | 656.92  | 1118.82  | 1012.98 |
| 0.05    | 0.10    | 0.09    | 26.01   | 40.45   | 0.04     | 0.04    |
| 0.05    | 0.10    | 0.09    | 0.03    | 0.03    | 37.55    | 24.64   |
| 35.52   | 260.63  | 206.41  | 35.36   | 11.63   | 25.47    | 192.20  |
| 518.54  | 114.59  | 211.95  | 540.60  | 452.22  | 251.70   | 319.40  |
| 210.38  | 0.10    | 0.09    | 388.35  | 444.84  | 4.72     | 6.75    |
| 72.42   | 49.40   | 45.51   | 12.97   | 57.91   | 45.60    | 46.15   |
| 0.05    | 0.10    | 0.09    | 0.03    | 0.15    | 0.04     | 0.04    |
| 0.05    | 0.10    | 22.88   | 292.65  | 88.92   | 0.04     | 0.04    |
| 41.20   | 67.89   | 12.93   | 222.93  | 137.15  | 951.67   | 798.10  |
| 59.40   | 37.47   | 127.77  | 531.64  | 251.22  | 82.31    | 13.21   |
| 15.21   | 96.39   | 36.10   | 19.12   | 0.03    | 19.94    | 0.04    |
| 948.48  | 2458.04 | 1804.03 | 653.39  | 648.60  | 2034.57  | 2320.95 |
| 32.28   | 16.76   | 30.72   | 1285.49 | 1393.39 | 770.89   | 326.96  |
| 1481.80 | 35.18   | 156.75  | 90.33   | 82.53   | 23.01    | 10.02   |
| 0.05    | 0.10    | 0.09    | 750.73  | 635.10  | 1.94     | 0.04    |
| 571.89  | 556.73  | 488.91  | 2592.85 | 3876.44 | 537.28   | 332.16  |
| 682.41  | 190.58  | 514.39  | 282.10  | 501.73  | 5555.99  | 4841.15 |
| 632.92  | 456.68  | 569.61  | 149.33  | 165.18  | 79.60    | 0.04    |

|         |         |         |         |         |          |          |
|---------|---------|---------|---------|---------|----------|----------|
| 50.64   | 10.58   | 46.97   | 84.00   | 116.33  | 0.04     | 0.04     |
| 54.81   | 0.10    | 0.09    | 41.96   | 42.40   | 0.04     | 0.04     |
| 52.26   | 46.27   | 49.41   | 0.03    | 0.03    | 0.04     | 0.04     |
| 57.11   | 1.04    | 0.09    | 40.08   | 31.77   | 0.04     | 0.04     |
| 43.54   | 360.40  | 510.27  | 34.29   | 47.49   | 20.05    | 0.04     |
| 190.24  | 387.86  | 597.78  | 508.69  | 652.02  | 420.64   | 255.78   |
| 0.05    | 822.82  | 441.74  | 0.03    | 0.03    | 0.04     | 0.04     |
| 2799.14 | 0.10    | 2.44    | 0.03    | 0.03    | 215.98   | 0.04     |
| 12.73   | 188.10  | 329.67  | 10.79   | 4.55    | 135.32   | 194.44   |
| 4.73    | 7.58    | 8.32    | 5.16    | 0.03    | 43.49    | 34.88    |
| 8.23    | 1653.80 | 1272.38 | 529.74  | 501.76  | 580.50   | 397.61   |
| 0.05    | 0.10    | 0.09    | 0.03    | 0.03    | 0.04     | 0.04     |
| 3461.91 | 6629.07 | 5373.73 | 9082.28 | 9348.32 | 13089.82 | 7669.11  |
| 12.42   | 176.07  | 163.23  | 0.96    | 0.03    | 0.04     | 0.04     |
| 2.15    | 3.38    | 0.09    | 5.02    | 0.74    | 2.36     | 2.98     |
| 4.60    | 27.30   | 8.12    | 1.36    | 4.24    | 14.99    | 23.11    |
| 314.95  | 211.73  | 282.42  | 7363.69 | 7237.78 | 57.38    | 77.91    |
| 12.60   | 13.37   | 0.09    | 0.03    | 0.03    | 0.04     | 25.19    |
| 195.66  | 99.64   | 103.43  | 74.20   | 67.21   | 0.04     | 0.04     |
| 844.71  | 444.20  | 191.77  | 0.03    | 41.73   | 85.83    | 601.52   |
| 0.05    | 45.74   | 0.09    | 12.74   | 36.28   | 16.48    | 0.04     |
| 194.28  | 51.31   | 31.91   | 936.90  | 546.51  | 1070.35  | 76.01    |
| 1053.75 | 3224.40 | 2901.58 | 1892.20 | 1484.39 | 2206.52  | 1843.81  |
| 1908.26 | 1116.10 | 1635.10 | 735.60  | 900.05  | 117.50   | 2.39     |
| 12.66   | 25.93   | 4.75    | 9.72    | 3.30    | 13.90    | 26.45    |
| 1348.48 | 1346.20 | 1863.74 | 552.31  | 675.86  | 152.96   | 311.92   |
| 44.41   | 44.39   | 0.09    | 180.81  | 143.08  | 61.12    | 142.94   |
| 0.05    | 0.10    | 0.09    | 0.03    | 0.03    | 0.04     | 0.04     |
| 0.05    | 0.10    | 0.09    | 0.03    | 0.03    | 0.04     | 0.04     |
| 0.05    | 0.10    | 0.09    | 0.03    | 0.03    | 123.04   | 200.67   |
| 131.99  | 271.23  | 230.01  | 290.58  | 199.47  | 24.44    | 16.85    |
| 294.45  | 177.07  | 102.93  | 1143.34 | 1080.98 | 27.65    | 140.67   |
| 41.48   | 9.53    | 15.99   | 83.23   | 118.41  | 0.04     | 24.73    |
| 362.86  | 528.91  | 450.65  | 3157.33 | 2390.26 | 2374.05  | 2580.67  |
| 38.20   | 1.54    | 0.09    | 0.03    | 0.03    | 102.14   | 343.60   |
| 0.05    | 5.35    | 0.09    | 7.93    | 7.82    | 123.40   | 178.96   |
| 2381.92 | 6377.60 | 4483.98 | 2242.78 | 2231.30 | 5833.13  | 11568.49 |

|          |          |          |          |          |          |          |
|----------|----------|----------|----------|----------|----------|----------|
| 167.32   | 227.45   | 123.18   | 196.22   | 188.64   | 0.04     | 0.04     |
| 567.00   | 8.89     | 24.99    | 24.24    | 9.00     | 29.91    | 6.74     |
| 472.77   | 653.49   | 511.85   | 784.31   | 725.88   | 1632.79  | 1295.95  |
| 4.46     | 3.53     | 9.05     | 3.93     | 1.98     | 3.25     | 0.04     |
| 61.20    | 52.89    | 28.38    | 49.19    | 35.39    | 125.92   | 98.86    |
| 17.75    | 148.60   | 121.40   | 233.17   | 133.10   | 1.61     | 7.05     |
| 1157.85  | 839.22   | 1010.22  | 56.70    | 33.25    | 221.51   | 490.96   |
| 1435.42  | 1124.20  | 732.95   | 1952.11  | 1467.31  | 402.67   | 349.09   |
| 11742.10 | 12614.24 | 7387.52  | 33564.05 | 28817.07 | 21175.75 | 26935.04 |
| 21561.14 | 17985.81 | 19315.81 | 18801.54 | 22357.99 | 11853.15 | 11549.85 |
| 170.96   | 3.21     | 9.31     | 22.39    | 15.68    | 0.04     | 2.34     |
| 155.52   | 160.45   | 199.75   | 79.17    | 69.59    | 128.66   | 94.03    |
| 61617.73 | 53484.04 | 60280.19 | 45038.30 | 44815.57 | 50389.21 | 55690.27 |
| 13459.08 | 11673.55 | 10236.82 | 15781.21 | 16051.38 | 14395.76 | 9041.83  |
| 17652.93 | 21911.12 | 26704.32 | 9643.76  | 10159.57 | 22085.05 | 14061.33 |
| 19189.35 | 20099.33 | 15346.53 | 9506.05  | 11564.83 | 9856.00  | 12463.59 |
| 1642.50  | 1294.74  | 1545.16  | 673.76   | 713.20   | 1396.68  | 2362.01  |
| 3000.59  | 4160.93  | 3328.55  | 926.41   | 914.44   | 1030.93  | 871.40   |
| 0.05     | 284.60   | 471.99   | 16.30    | 18.52    | 19.81    | 0.04     |
| 4882.03  | 816.17   | 1098.17  | 713.58   | 845.39   | 301.20   | 151.68   |
| 16.71    | 35.63    | 0.09     | 3075.96  | 2634.28  | 77.03    | 104.25   |
| 2899.56  | 1194.09  | 2443.78  | 66.90    | 163.31   | 830.55   | 18.37    |
| 2.36     | 0.10     | 0.09     | 0.03     | 0.03     | 0.04     | 0.04     |
| 90.70    | 49.92    | 9.82     | 72.74    | 71.66    | 163.01   | 0.04     |
| 0.05     | 0.10     | 3.72     | 0.03     | 1.80     | 9.31     | 0.04     |
| 0.05     | 0.10     | 0.09     | 0.03     | 0.03     | 0.04     | 0.04     |
| 261.46   | 308.98   | 124.15   | 355.38   | 314.26   | 565.80   | 665.05   |
| 0.05     | 2.83     | 6.02     | 0.67     | 2.60     | 0.04     | 0.04     |
| 0.05     | 0.10     | 0.09     | 0.03     | 0.03     | 0.04     | 0.04     |
| 1798.52  | 2196.93  | 2550.48  | 1528.39  | 1815.06  | 990.97   | 1453.92  |
| 36.90    | 437.52   | 318.68   | 761.64   | 711.21   | 2564.17  | 1500.99  |
| 3.44     | 5.39     | 3.09     | 65.43    | 19.17    | 0.04     | 0.04     |
| 260.27   | 114.39   | 94.61    | 50.42    | 52.92    | 393.18   | 42.07    |
| 0.05     | 1.41     | 3.90     | 3.55     | 0.63     | 22.32    | 52.07    |
| 5297.86  | 6162.71  | 8427.25  | 1710.66  | 1989.93  | 7482.00  | 7414.48  |
| 6119.48  | 1765.53  | 1014.00  | 178.89   | 237.07   | 575.72   | 651.33   |
| 0.05     | 0.10     | 0.59     | 0.03     | 0.03     | 0.04     | 0.04     |

|         |          |          |          |          |          |          |
|---------|----------|----------|----------|----------|----------|----------|
| 439.16  | 556.47   | 367.51   | 1236.05  | 968.79   | 1430.35  | 1757.21  |
| 41.24   | 185.37   | 143.71   | 14.89    | 0.03     | 50.08    | 105.90   |
| 1031.20 | 282.67   | 442.47   | 2009.91  | 1669.35  | 40.61    | 16.64    |
| 188.90  | 0.10     | 0.09     | 26.29    | 19.52    | 25.12    | 24.45    |
| 0.05    | 0.10     | 0.09     | 0.03     | 0.03     | 1.46     | 4.86     |
| 0.05    | 0.10     | 5.21     | 0.03     | 0.03     | 62.17    | 0.04     |
| 5.88    | 12.55    | 0.09     | 0.60     | 11.90    | 14.72    | 28.91    |
| 9.10    | 0.10     | 0.65     | 261.37   | 227.92   | 335.10   | 52.14    |
| 1084.03 | 1817.82  | 1737.15  | 427.60   | 332.64   | 721.50   | 498.99   |
| 3121.33 | 659.51   | 496.87   | 194.49   | 222.75   | 0.70     | 0.04     |
| 25.33   | 0.78     | 0.09     | 1.15     | 0.03     | 65.10    | 2.85     |
| 552.90  | 465.64   | 512.16   | 152.51   | 93.87    | 48.37    | 36.78    |
| 0.05    | 0.10     | 0.09     | 28.21    | 44.78    | 0.04     | 5.61     |
| 398.57  | 140.63   | 110.38   | 260.59   | 234.47   | 1036.73  | 1523.20  |
| 237.54  | 138.88   | 143.59   | 527.87   | 396.44   | 123.18   | 128.07   |
| 3.70    | 0.45     | 23.21    | 94.47    | 39.14    | 39.89    | 118.24   |
| 48.07   | 247.56   | 111.41   | 3.05     | 63.22    | 1265.06  | 1702.00  |
| 36.68   | 9.83     | 0.09     | 482.01   | 760.16   | 10.69    | 13.59    |
| 4449.01 | 16735.34 | 15234.00 | 22927.84 | 24589.99 | 26870.07 | 25343.73 |
| 431.80  | 1198.29  | 1039.98  | 2295.86  | 2167.63  | 766.02   | 877.58   |
| 866.71  | 1002.92  | 676.99   | 622.00   | 716.75   | 1374.31  | 2554.17  |
| 0.05    | 0.10     | 0.09     | 81.22    | 0.03     | 1497.96  | 1160.30  |
| 424.17  | 1841.94  | 1370.37  | 294.39   | 521.89   | 150.74   | 53.80    |
| 0.05    | 0.10     | 0.09     | 0.03     | 0.03     | 0.04     | 0.04     |
| 212.68  | 33.32    | 27.21    | 80.70    | 47.64    | 289.01   | 82.63    |
| 13.53   | 41.48    | 11.38    | 0.03     | 0.03     | 37.57    | 43.33    |
| 589.28  | 171.01   | 494.38   | 289.57   | 445.02   | 25.08    | 67.56    |
| 1349.95 | 461.23   | 753.56   | 3256.91  | 2318.61  | 288.93   | 115.00   |
| 988.21  | 798.72   | 1450.48  | 1241.05  | 1198.02  | 785.62   | 844.66   |
| 1410.71 | 705.71   | 769.05   | 87.74    | 235.27   | 512.14   | 1004.85  |
| 874.23  | 1537.19  | 1770.85  | 2154.14  | 2063.03  | 626.04   | 144.02   |
| 313.30  | 0.10     | 0.09     | 47.04    | 77.63    | 193.19   | 26.31    |
| 524.72  | 854.48   | 746.51   | 183.69   | 175.24   | 234.31   | 218.58   |
| 38.20   | 21.27    | 6.46     | 32.95    | 4.43     | 0.04     | 0.71     |
| 11.28   | 43.84    | 145.31   | 159.42   | 213.32   | 183.14   | 119.32   |
| 211.13  | 313.24   | 462.74   | 1101.78  | 992.34   | 75.33    | 79.90    |
| 237.25  | 2193.21  | 1306.42  | 138.49   | 217.35   | 134.15   | 224.94   |

|         |          |         |         |         |          |          |
|---------|----------|---------|---------|---------|----------|----------|
| 123.53  | 213.29   | 138.71  | 0.03    | 54.46   | 25.44    | 69.21    |
| 0.05    | 8.93     | 28.24   | 122.87  | 162.96  | 0.62     | 0.36     |
| 131.96  | 513.85   | 830.43  | 190.42  | 407.47  | 230.22   | 285.05   |
| 0.05    | 6.19     | 1.19    | 0.03    | 0.03    | 0.04     | 0.04     |
| 1.47    | 4.07     | 0.09    | 14.40   | 7.38    | 0.04     | 0.04     |
| 72.79   | 87.81    | 59.03   | 287.58  | 424.28  | 15.00    | 19.86    |
| 0.05    | 0.10     | 0.09    | 0.03    | 0.03    | 0.04     | 0.04     |
| 1670.87 | 1023.86  | 590.01  | 71.07   | 53.12   | 0.04     | 1.08     |
| 259.30  | 898.85   | 542.12  | 213.89  | 136.52  | 495.86   | 1081.95  |
| 0.05    | 0.10     | 6.62    | 6.53    | 9.03    | 0.04     | 0.04     |
| 1420.90 | 1432.32  | 979.41  | 1351.57 | 1027.55 | 143.96   | 0.04     |
| 11.69   | 15.76    | 13.29   | 103.05  | 90.14   | 14.85    | 25.40    |
| 117.83  | 90.32    | 0.09    | 369.47  | 415.54  | 65.45    | 141.31   |
| 7.88    | 50.01    | 60.74   | 53.81   | 14.50   | 0.04     | 0.04     |
| 1146.86 | 3668.90  | 2497.94 | 88.98   | 47.19   | 537.81   | 1050.66  |
| 39.48   | 42.91    | 27.95   | 8.90    | 15.46   | 137.29   | 55.67    |
| 7764.02 | 11597.09 | 9309.91 | 2865.38 | 3195.67 | 5842.92  | 3416.78  |
| 1066.42 | 1084.23  | 1324.58 | 13.18   | 53.78   | 140.38   | 59.09    |
| 0.05    | 0.10     | 0.09    | 0.03    | 0.03    | 0.04     | 0.04     |
| 29.48   | 396.92   | 307.74  | 130.31  | 164.75  | 299.47   | 200.13   |
| 490.75  | 129.49   | 114.11  | 147.95  | 78.64   | 0.04     | 0.04     |
| 107.14  | 6.33     | 0.56    | 91.00   | 122.71  | 0.04     | 17.79    |
| 22.77   | 23.48    | 26.55   | 7.62    | 11.13   | 23.99    | 0.04     |
| 0.05    | 0.10     | 64.72   | 1933.45 | 2137.07 | 0.04     | 22.35    |
| 1095.78 | 0.10     | 323.54  | 0.03    | 0.03    | 25.22    | 40.76    |
| 2.44    | 0.76     | 0.09    | 23.09   | 38.02   | 0.04     | 0.04     |
| 214.71  | 16.09    | 5.88    | 6.56    | 1.18    | 0.04     | 0.04     |
| 629.36  | 299.18   | 232.68  | 88.68   | 133.48  | 729.71   | 667.97   |
| 5.87    | 10.15    | 122.60  | 106.81  | 133.83  | 0.04     | 0.04     |
| 518.96  | 1007.91  | 900.91  | 622.60  | 557.11  | 881.05   | 904.88   |
| 0.05    | 6.33     | 0.09    | 5.51    | 0.03    | 0.04     | 0.04     |
| 554.26  | 591.79   | 373.59  | 64.79   | 131.06  | 346.65   | 972.76   |
| 105.41  | 130.36   | 72.76   | 42.22   | 23.38   | 102.96   | 101.74   |
| 649.96  | 199.76   | 223.19  | 46.73   | 4.13    | 0.04     | 0.04     |
| 0.54    | 7.71     | 11.39   | 2.29    | 0.33    | 0.04     | 0.04     |
| 0.05    | 0.10     | 0.09    | 31.68   | 13.03   | 497.34   | 0.04     |
| 4092.67 | 4137.70  | 3339.37 | 5830.53 | 4975.24 | 11567.22 | 12582.97 |

|          |          |          |          |          |          |          |
|----------|----------|----------|----------|----------|----------|----------|
| 2.46     | 0.10     | 0.09     | 0.03     | 0.03     | 0.04     | 0.04     |
| 186.16   | 117.13   | 492.52   | 285.36   | 299.42   | 1083.33  | 1348.98  |
| 64.46    | 78.59    | 58.15    | 152.31   | 400.00   | 19.79    | 3.72     |
| 2900.00  | 1530.75  | 2694.33  | 59.64    | 134.16   | 2325.05  | 3348.39  |
| 691.10   | 831.62   | 1468.16  | 2643.04  | 3024.39  | 350.24   | 207.75   |
| 784.27   | 68.37    | 15.05    | 48.49    | 81.80    | 571.81   | 1317.30  |
| 0.05     | 27.71    | 17.21    | 8.46     | 4.47     | 0.04     | 30.94    |
| 0.05     | 0.10     | 23.30    | 235.18   | 206.51   | 35.04    | 0.04     |
| 33.79    | 31.55    | 55.50    | 495.45   | 504.32   | 30.54    | 22.00    |
| 1420.67  | 9954.35  | 5853.79  | 1005.49  | 866.71   | 2920.77  | 3808.52  |
| 0.73     | 112.64   | 36.07    | 103.73   | 32.46    | 173.45   | 124.30   |
| 149.79   | 0.10     | 0.58     | 103.20   | 110.70   | 454.57   | 875.13   |
| 120.90   | 179.82   | 137.63   | 54.36    | 44.93    | 998.19   | 3151.91  |
| 5500.77  | 10724.90 | 10829.98 | 29857.35 | 34749.84 | 12805.39 | 16092.94 |
| 0.75     | 12.29    | 5.55     | 4.77     | 6.08     | 2.22     | 0.04     |
| 1509.58  | 2941.08  | 6325.06  | 2407.37  | 3137.82  | 860.26   | 338.93   |
| 9.54     | 267.90   | 511.32   | 797.05   | 597.00   | 486.43   | 906.81   |
| 0.05     | 0.10     | 0.09     | 44.10    | 11.07    | 551.24   | 153.22   |
| 1268.51  | 578.57   | 585.22   | 256.52   | 235.20   | 186.05   | 147.98   |
| 772.57   | 877.15   | 574.31   | 250.17   | 235.42   | 0.04     | 18.37    |
| 0.34     | 0.10     | 0.09     | 0.03     | 0.03     | 0.04     | 0.04     |
| 31796.22 | 2236.53  | 1722.94  | 1126.28  | 1036.30  | 1600.02  | 1600.22  |
| 96.57    | 16.51    | 8.40     | 63.86    | 60.18    | 71.07    | 21.38    |
| 4435.31  | 1262.44  | 1269.98  | 0.03     | 0.03     | 0.04     | 0.04     |
| 4.66     | 127.38   | 83.99    | 9.79     | 17.72    | 0.04     | 0.04     |
| 38.34    | 173.35   | 100.38   | 0.03     | 8.21     | 0.04     | 0.04     |
| 282.42   | 59.91    | 47.96    | 159.81   | 169.99   | 45.20    | 52.02    |
| 542.54   | 391.94   | 530.79   | 38.05    | 153.44   | 98.02    | 9.81     |
| 270.55   | 195.53   | 206.31   | 5.35     | 0.03     | 140.13   | 63.86    |
| 320.82   | 93.11    | 82.13    | 665.11   | 1210.72  | 163.63   | 155.81   |
| 3484.80  | 2144.76  | 1770.00  | 470.54   | 491.04   | 1376.76  | 581.55   |
| 427.23   | 1474.36  | 986.93   | 5114.63  | 4764.22  | 2450.62  | 2436.18  |
| 31501.01 | 31807.39 | 55531.63 | 7979.34  | 7982.85  | 29723.55 | 39018.84 |
| 3.98     | 6.20     | 0.09     | 4.17     | 2.71     | 3.68     | 43.28    |
| 59.19    | 365.40   | 322.46   | 12.17    | 7.03     | 204.99   | 153.24   |
| 0.05     | 0.10     | 0.09     | 0.03     | 0.03     | 0.04     | 0.04     |
| 0.05     | 390.45   | 433.69   | 8.85     | 1.49     | 0.04     | 2.41     |

|         |         |         |         |         |         |         |
|---------|---------|---------|---------|---------|---------|---------|
| 53.66   | 637.78  | 387.28  | 519.55  | 382.89  | 183.85  | 0.04    |
| 208.60  | 825.71  | 1108.42 | 0.03    | 15.64   | 125.62  | 10.77   |
| 45.69   | 2420.06 | 1870.68 | 1580.28 | 1750.17 | 0.04    | 18.56   |
| 2.75    | 7.19    | 0.09    | 21.82   | 7.82    | 39.56   | 32.84   |
| 3.41    | 2.13    | 7.49    | 0.03    | 3.64    | 115.11  | 0.04    |
| 43.10   | 247.04  | 731.68  | 338.80  | 474.70  | 405.34  | 38.12   |
| 0.05    | 4.84    | 0.09    | 162.10  | 292.18  | 9.79    | 0.04    |
| 0.05    | 880.84  | 416.73  | 12.30   | 15.32   | 0.04    | 181.27  |
| 62.75   | 853.33  | 670.91  | 0.03    | 0.03    | 0.04    | 0.04    |
| 361.94  | 1497.92 | 1251.64 | 536.75  | 867.84  | 86.56   | 266.01  |
| 519.71  | 3013.23 | 3535.82 | 914.58  | 1073.11 | 849.78  | 554.89  |
| 0.05    | 1309.02 | 1049.07 | 0.03    | 20.72   | 98.52   | 192.31  |
| 0.05    | 0.10    | 0.09    | 0.03    | 0.03    | 20.60   | 50.04   |
| 147.19  | 851.85  | 780.02  | 47.81   | 41.02   | 80.59   | 185.51  |
| 289.34  | 809.93  | 709.34  | 203.79  | 205.13  | 695.40  | 1287.23 |
| 38.57   | 5.66    | 19.06   | 27.39   | 16.89   | 91.90   | 532.16  |
| 5.37    | 28.54   | 29.06   | 46.78   | 25.28   | 32.84   | 3.18    |
| 0.05    | 0.10    | 0.09    | 0.03    | 0.03    | 0.04    | 0.04    |
| 48.66   | 14.92   | 22.13   | 669.75  | 1123.26 | 128.16  | 19.65   |
| 312.12  | 287.96  | 64.22   | 1134.16 | 840.22  | 206.68  | 326.63  |
| 332.58  | 282.01  | 389.35  | 843.55  | 643.94  | 250.15  | 201.04  |
| 135.78  | 12.54   | 19.63   | 308.84  | 472.19  | 3550.38 | 3646.55 |
| 544.45  | 23.31   | 1.67    | 9.57    | 1.19    | 17.86   | 85.88   |
| 29.71   | 65.68   | 65.85   | 112.50  | 83.41   | 120.12  | 109.00  |
| 38.60   | 55.09   | 72.82   | 115.09  | 120.83  | 216.74  | 174.86  |
| 55.35   | 24.73   | 32.88   | 6.72    | 11.89   | 2.28    | 0.04    |
| 72.61   | 27.88   | 8.67    | 37.90   | 73.95   | 9.62    | 59.24   |
| 184.66  | 3.64    | 6.30    | 146.43  | 190.34  | 49.82   | 134.92  |
| 0.05    | 0.43    | 1.01    | 0.03    | 0.03    | 0.04    | 0.04    |
| 0.05    | 82.05   | 29.99   | 69.14   | 0.03    | 37.75   | 0.04    |
| 175.87  | 1.91    | 0.09    | 3.80    | 0.03    | 9.21    | 15.54   |
| 1445.28 | 321.41  | 297.27  | 215.74  | 195.43  | 409.00  | 431.77  |
| 2229.40 | 4541.88 | 4448.76 | 2957.86 | 2765.63 | 3012.28 | 3135.73 |
| 0.05    | 0.10    | 0.09    | 0.03    | 0.03    | 0.04    | 0.04    |
| 59.85   | 364.57  | 269.96  | 684.74  | 413.86  | 1006.75 | 768.76  |
| 55.81   | 6.71    | 4.83    | 12.66   | 34.68   | 0.04    | 0.04    |
| 10.16   | 8.79    | 15.85   | 3.55    | 4.44    | 25.23   | 5.25    |

|          |         |          |          |         |         |          |
|----------|---------|----------|----------|---------|---------|----------|
| 1887.84  | 2129.06 | 2889.92  | 874.00   | 637.15  | 662.09  | 718.50   |
| 221.56   | 5.44    | 10.85    | 460.89   | 372.71  | 50.80   | 72.62    |
| 3.93     | 31.72   | 29.88    | 1.33     | 0.94    | 6.01    | 1.01     |
| 12.33    | 0.10    | 0.09     | 0.03     | 4.92    | 0.04    | 0.04     |
| 27.91    | 8.76    | 1.29     | 8.37     | 6.15    | 11.39   | 1.07     |
| 0.05     | 0.10    | 10.86    | 8.41     | 0.84    | 0.04    | 0.04     |
| 328.79   | 0.10    | 0.09     | 29.14    | 23.46   | 55.95   | 10.98    |
| 0.05     | 0.10    | 0.09     | 0.03     | 0.03    | 5.29    | 0.04     |
| 26.34    | 0.10    | 0.09     | 7.76     | 2.80    | 97.24   | 37.92    |
| 9.81     | 76.50   | 35.44    | 0.03     | 11.22   | 0.04    | 0.04     |
| 319.07   | 88.02   | 70.53    | 91.46    | 182.25  | 85.26   | 18.98    |
| 5.42     | 7.03    | 3.76     | 4.60     | 0.94    | 2.20    | 6.40     |
| 1331.32  | 537.52  | 522.16   | 38.75    | 51.44   | 0.04    | 112.48   |
| 39.67    | 44.63   | 67.06    | 57.04    | 25.75   | 0.04    | 0.04     |
| 10743.82 | 9393.36 | 8824.71  | 10299.61 | 9858.70 | 1870.11 | 234.46   |
| 826.70   | 186.15  | 357.02   | 288.07   | 411.37  | 527.43  | 199.39   |
| 719.35   | 1241.09 | 762.15   | 1766.15  | 1516.20 | 1712.35 | 976.62   |
| 512.81   | 0.10    | 0.09     | 330.12   | 668.53  | 86.40   | 8.03     |
| 0.66     | 0.10    | 0.82     | 0.79     | 1.15    | 0.04    | 0.04     |
| 0.05     | 0.10    | 0.74     | 0.03     | 0.03    | 0.49    | 0.04     |
| 128.31   | 2.39    | 12.06    | 15.24    | 12.22   | 57.26   | 123.94   |
| 90.99    | 0.10    | 19.16    | 65.18    | 28.79   | 72.97   | 47.43    |
| 9.74     | 19.33   | 35.20    | 510.60   | 418.13  | 0.04    | 0.04     |
| 189.44   | 18.63   | 10.61    | 42.64    | 26.96   | 9.84    | 13.15    |
| 3346.85  | 2304.85 | 3335.12  | 2299.38  | 2256.77 | 1408.23 | 3584.00  |
| 4865.98  | 3066.65 | 2750.77  | 125.07   | 128.48  | 3751.89 | 4355.53  |
| 640.05   | 317.08  | 222.49   | 1158.34  | 1480.43 | 31.91   | 57.13    |
| 4335.96  | 5527.76 | 6136.51  | 7223.12  | 7607.98 | 6719.37 | 11708.28 |
| 2374.58  | 3775.72 | 3438.39  | 3469.20  | 3957.70 | 885.78  | 1196.39  |
| 10610.12 | 5848.99 | 10058.03 | 11973.77 | 9740.27 | 3888.76 | 4254.74  |
| 17.12    | 2.04    | 19.20    | 0.03     | 17.31   | 1.11    | 0.04     |
| 5493.64  | 1746.77 | 1493.34  | 1544.83  | 1014.03 | 1.84    | 0.04     |
| 15.86    | 93.01   | 98.85    | 29.75    | 24.52   | 0.04    | 0.04     |
| 0.05     | 0.10    | 0.09     | 64.56    | 21.50   | 18.78   | 10.70    |
| 5.36     | 117.20  | 57.22    | 161.77   | 124.67  | 0.04    | 0.04     |
| 1149.55  | 707.12  | 399.33   | 279.07   | 340.67  | 523.27  | 183.58   |
| 536.46   | 731.39  | 1477.07  | 1800.57  | 1495.57 | 1002.37 | 73.43    |

|         |         |         |          |          |          |         |
|---------|---------|---------|----------|----------|----------|---------|
| 2172.70 | 1077.38 | 1316.94 | 599.38   | 856.35   | 933.90   | 938.83  |
| 16.85   | 30.97   | 23.01   | 1398.72  | 1131.30  | 271.92   | 0.04    |
| 831.73  | 3047.77 | 1756.29 | 7564.58  | 7224.80  | 2603.43  | 3976.97 |
| 1365.32 | 8464.51 | 5131.86 | 639.85   | 691.71   | 1395.14  | 1847.51 |
| 0.05    | 20.81   | 0.09    | 43.13    | 5.77     | 11.53    | 13.53   |
| 221.52  | 411.51  | 474.89  | 317.25   | 291.23   | 81.79    | 164.71  |
| 0.05    | 0.10    | 0.09    | 15.07    | 1.82     | 0.04     | 1.12    |
| 2871.45 | 1753.25 | 2738.94 | 884.35   | 683.22   | 101.08   | 125.16  |
| 2450.59 | 3285.31 | 3465.03 | 1239.62  | 1569.36  | 631.28   | 363.56  |
| 0.05    | 0.10    | 0.09    | 0.03     | 0.03     | 0.04     | 1.86    |
| 1.48    | 0.10    | 0.09    | 0.03     | 0.03     | 0.04     | 0.04    |
| 509.84  | 973.46  | 739.98  | 522.23   | 475.14   | 0.04     | 0.04    |
| 0.05    | 2.46    | 0.09    | 0.03     | 0.03     | 0.04     | 0.04    |
| 1439.29 | 732.71  | 941.33  | 14444.99 | 13801.45 | 2579.86  | 2814.54 |
| 13.17   | 35.62   | 58.75   | 177.49   | 97.25    | 538.30   | 520.22  |
| 1873.22 | 1779.09 | 2225.31 | 1240.98  | 748.50   | 1529.81  | 1010.63 |
| 4736.88 | 6530.14 | 5827.53 | 15361.05 | 14642.06 | 11143.24 | 9479.02 |
| 8.80    | 25.52   | 41.39   | 0.03     | 6.73     | 33.41    | 43.15   |
| 0.05    | 1.90    | 0.09    | 4.01     | 8.19     | 0.04     | 0.04    |
| 452.69  | 156.62  | 69.69   | 1305.85  | 1285.07  | 1596.45  | 750.77  |
| 4709.01 | 4391.08 | 2149.93 | 3256.84  | 3145.07  | 14987.35 | 7054.96 |
| 0.05    | 164.00  | 114.71  | 692.08   | 680.98   | 1167.74  | 1493.62 |
| 0.05    | 4.69    | 0.09    | 0.03     | 1.44     | 0.04     | 0.04    |
| 205.10  | 39.58   | 17.89   | 236.12   | 133.75   | 168.31   | 10.74   |
| 103.57  | 21.48   | 25.76   | 7.07     | 8.72     | 7.68     | 0.04    |
| 0.05    | 61.96   | 101.88  | 0.03     | 0.03     | 0.04     | 0.04    |
| 26.48   | 56.46   | 29.30   | 62.32    | 84.45    | 75.21    | 54.28   |
| 24.28   | 206.23  | 78.28   | 6824.09  | 6448.69  | 327.66   | 700.97  |
| 7.46    | 122.52  | 71.18   | 844.38   | 642.68   | 88.96    | 37.59   |
| 1179.74 | 1430.19 | 1392.80 | 27.23    | 57.63    | 9.79     | 4.14    |
| 87.67   | 757.64  | 529.46  | 948.28   | 536.63   | 133.34   | 240.25  |
| 209.57  | 29.36   | 16.98   | 624.82   | 656.45   | 211.07   | 46.46   |
| 2677.23 | 922.80  | 1189.47 | 10714.15 | 10755.70 | 10534.08 | 7816.65 |
| 2.55    | 0.10    | 0.09    | 18.94    | 36.52    | 1.85     | 0.04    |
| 884.25  | 758.27  | 1083.55 | 659.74   | 547.86   | 1269.84  | 1803.75 |
| 1308.00 | 1245.54 | 1197.24 | 349.21   | 192.22   | 0.04     | 11.05   |
| 1831.34 | 0.10    | 87.53   | 703.42   | 803.75   | 1673.63  | 1406.05 |

|         |         |         |          |         |         |         |
|---------|---------|---------|----------|---------|---------|---------|
| 144.13  | 11.88   | 15.44   | 15.09    | 20.79   | 448.80  | 835.47  |
| 14.71   | 1.69    | 0.09    | 4.45     | 8.40    | 6.74    | 15.66   |
| 1.09    | 0.10    | 0.09    | 0.03     | 0.61    | 7.02    | 0.78    |
| 445.89  | 3362.19 | 3000.33 | 3024.09  | 3397.05 | 1814.52 | 232.07  |
| 155.70  | 11.77   | 4.33    | 130.36   | 109.87  | 5.67    | 14.03   |
| 130.51  | 165.72  | 206.08  | 1165.45  | 1889.50 | 326.46  | 281.90  |
| 0.05    | 0.10    | 0.09    | 3188.99  | 2691.16 | 0.04    | 0.04    |
| 1221.66 | 1181.47 | 1787.49 | 35.39    | 34.44   | 1182.65 | 1306.68 |
| 2.28    | 10.52   | 3.32    | 0.03     | 0.03    | 0.04    | 0.04    |
| 0.05    | 0.10    | 0.09    | 632.71   | 702.01  | 0.04    | 0.04    |
| 0.05    | 0.10    | 0.09    | 0.03     | 0.03    | 1.86    | 0.04    |
| 378.60  | 214.28  | 408.15  | 140.86   | 181.67  | 621.56  | 466.17  |
| 0.05    | 3.66    | 0.09    | 0.03     | 0.03    | 0.04    | 0.04    |
| 215.64  | 157.27  | 172.78  | 148.08   | 197.74  | 93.68   | 100.92  |
| 1.18    | 0.10    | 0.09    | 1.82     | 0.25    | 0.94    | 0.04    |
| 74.42   | 47.12   | 18.99   | 99.66    | 94.35   | 95.90   | 48.39   |
| 69.01   | 0.10    | 0.09    | 201.84   | 138.96  | 39.23   | 10.24   |
| 4.82    | 4.51    | 3.80    | 3.65     | 0.67    | 83.86   | 15.75   |
| 7.85    | 4.33    | 30.48   | 1.62     | 3.04    | 28.57   | 1.69    |
| 71.16   | 145.74  | 258.25  | 66.49    | 107.18  | 52.05   | 0.04    |
| 330.00  | 303.07  | 170.02  | 361.25   | 341.58  | 1234.65 | 1679.07 |
| 0.05    | 12.85   | 16.06   | 0.03     | 0.03    | 49.19   | 146.32  |
| 16.65   | 26.31   | 29.97   | 83.21    | 80.38   | 247.66  | 262.92  |
| 0.05    | 0.10    | 0.09    | 0.03     | 0.03    | 0.04    | 0.04    |
| 693.27  | 757.12  | 528.93  | 837.18   | 880.58  | 1324.11 | 1676.06 |
| 14.87   | 18.11   | 9.96    | 9.21     | 5.17    | 1.33    | 42.96   |
| 3409.75 | 2286.38 | 3286.33 | 11017.37 | 9673.20 | 63.71   | 39.68   |
| 675.64  | 990.46  | 834.90  | 978.42   | 1294.56 | 1195.27 | 1343.67 |
| 5.91    | 982.13  | 1254.68 | 2062.46  | 1906.67 | 91.28   | 16.92   |
| 0.05    | 0.10    | 0.09    | 794.33   | 606.93  | 0.04    | 0.04    |
| 407.15  | 330.49  | 216.04  | 368.63   | 323.01  | 60.84   | 187.36  |
| 283.71  | 4.68    | 43.24   | 0.03     | 0.03    | 2.23    | 0.04    |
| 185.44  | 0.10    | 0.09    | 862.56   | 631.36  | 223.58  | 47.50   |
| 66.13   | 16.06   | 11.67   | 8.42     | 11.50   | 0.04    | 16.07   |
| 0.05    | 0.10    | 0.09    | 6.71     | 0.03    | 0.04    | 0.04    |
| 1974.54 | 3338.03 | 3121.25 | 972.67   | 941.25  | 2305.38 | 1421.00 |
| 55.47   | 173.99  | 170.44  | 32.21    | 81.99   | 6.72    | 0.04    |

|         |         |         |         |         |          |          |
|---------|---------|---------|---------|---------|----------|----------|
| 383.17  | 629.55  | 299.14  | 0.03    | 0.03    | 1429.80  | 1050.56  |
| 595.72  | 1509.36 | 1494.42 | 809.99  | 1334.12 | 141.75   | 160.24   |
| 1193.24 | 913.66  | 1105.94 | 97.84   | 49.21   | 536.96   | 472.61   |
| 359.12  | 66.99   | 37.91   | 24.31   | 14.05   | 0.04     | 0.04     |
| 206.36  | 662.58  | 348.83  | 4038.81 | 4090.08 | 627.63   | 1099.12  |
| 2602.87 | 2147.60 | 1635.07 | 1806.50 | 1707.37 | 1532.20  | 1170.01  |
| 20.26   | 0.10    | 0.09    | 3.97    | 9.40    | 0.04     | 0.04     |
| 0.05    | 15.05   | 0.09    | 0.03    | 2.86    | 0.04     | 22.44    |
| 27.31   | 162.10  | 241.14  | 3990.53 | 3847.98 | 86.64    | 94.69    |
| 306.35  | 0.10    | 0.09    | 1692.08 | 845.48  | 219.85   | 0.04     |
| 0.05    | 0.10    | 8.52    | 0.03    | 0.03    | 152.88   | 316.52   |
| 409.75  | 270.17  | 180.14  | 10.74   | 14.08   | 82.36    | 223.36   |
| 4.40    | 0.48    | 26.69   | 0.03    | 8.58    | 3.31     | 5.19     |
| 85.71   | 222.77  | 187.74  | 34.26   | 67.41   | 92.56    | 170.86   |
| 588.42  | 856.05  | 991.82  | 25.19   | 33.81   | 1379.10  | 1298.25  |
| 0.05    | 0.10    | 2.31    | 4.24    | 11.09   | 0.04     | 0.04     |
| 10.47   | 0.10    | 0.09    | 302.14  | 264.49  | 358.34   | 90.71    |
| 95.65   | 923.63  | 1105.10 | 15.78   | 17.81   | 20.73    | 73.93    |
| 77.65   | 29.19   | 51.25   | 5.75    | 27.14   | 179.80   | 95.16    |
| 0.05    | 0.10    | 0.09    | 0.03    | 0.03    | 348.17   | 432.40   |
| 45.40   | 0.10    | 2.16    | 325.27  | 177.74  | 102.06   | 0.04     |
| 17.81   | 0.10    | 100.99  | 506.13  | 568.41  | 271.09   | 91.38    |
| 2.89    | 6.51    | 8.10    | 18.15   | 12.22   | 0.04     | 0.04     |
| 191.29  | 142.38  | 106.12  | 171.07  | 186.98  | 319.82   | 341.66   |
| 76.40   | 43.01   | 153.87  | 0.03    | 0.03    | 170.70   | 173.57   |
| 61.94   | 36.95   | 13.89   | 205.00  | 77.73   | 56.69    | 102.55   |
| 302.79  | 103.32  | 53.71   | 0.03    | 11.77   | 14.32    | 0.04     |
| 15.94   | 0.81    | 10.49   | 19.50   | 2.26    | 52.90    | 220.49   |
| 25.97   | 12.69   | 25.37   | 6.76    | 4.48    | 0.30     | 0.04     |
| 61.27   | 149.48  | 107.90  | 42.67   | 37.46   | 0.04     | 0.90     |
| 239.94  | 55.12   | 50.98   | 28.03   | 34.64   | 12.87    | 4.29     |
| 16.93   | 0.10    | 0.09    | 18.80   | 16.88   | 10.62    | 0.04     |
| 0.05    | 0.10    | 0.09    | 0.03    | 0.03    | 7.74     | 0.04     |
| 924.47  | 380.99  | 392.13  | 88.74   | 112.49  | 368.52   | 561.91   |
| 6.44    | 27.63   | 7.26    | 0.03    | 1.13    | 0.04     | 0.04     |
| 92.45   | 0.10    | 0.09    | 464.75  | 212.20  | 16.96    | 37.16    |
| 2961.77 | 2696.98 | 1900.62 | 2010.83 | 1402.75 | 10268.54 | 19484.42 |

|         |         |         |         |         |          |          |
|---------|---------|---------|---------|---------|----------|----------|
| 0.05    | 0.10    | 0.09    | 10.53   | 0.03    | 0.04     | 0.04     |
| 0.05    | 38.35   | 7.50    | 172.46  | 122.49  | 0.04     | 0.04     |
| 1637.20 | 1823.11 | 1805.01 | 1405.38 | 1407.57 | 19548.66 | 33685.34 |
| 0.05    | 377.33  | 309.01  | 144.59  | 43.92   | 0.04     | 0.04     |
| 925.33  | 3508.24 | 2522.26 | 3149.93 | 3081.05 | 2567.68  | 225.14   |
| 450.67  | 72.85   | 95.71   | 1143.37 | 1565.74 | 420.44   | 375.29   |
| 232.61  | 266.56  | 255.33  | 0.03    | 0.03    | 0.04     | 3.17     |
| 0.05    | 0.10    | 17.04   | 1268.11 | 933.34  | 0.04     | 60.48    |
| 40.24   | 1265.25 | 1181.00 | 8.62    | 10.29   | 16.85    | 139.00   |
| 9.50    | 49.87   | 30.97   | 1238.39 | 1237.87 | 11.58    | 36.13    |
| 4571.24 | 3095.10 | 2024.62 | 666.62  | 718.23  | 383.08   | 478.93   |
| 20.35   | 0.10    | 22.82   | 1242.25 | 1194.64 | 74.29    | 119.89   |
| 301.45  | 424.27  | 279.48  | 42.96   | 0.03    | 428.22   | 197.38   |
| 10.47   | 119.32  | 55.13   | 88.95   | 483.67  | 0.04     | 40.78    |
| 403.22  | 380.87  | 590.78  | 158.77  | 227.95  | 2805.31  | 432.37   |
| 0.05    | 0.10    | 6.09    | 254.46  | 24.41   | 0.04     | 0.04     |
| 856.48  | 2018.91 | 2122.33 | 3346.34 | 3468.72 | 1383.42  | 283.79   |
| 215.67  | 0.10    | 0.09    | 841.28  | 1332.84 | 0.04     | 0.04     |
| 13.62   | 8.66    | 0.09    | 4.85    | 17.35   | 7.57     | 8.48     |
| 2374.34 | 1915.15 | 1765.49 | 1806.16 | 2029.13 | 239.36   | 42.46    |
| 235.87  | 959.06  | 830.53  | 926.71  | 1177.79 | 397.64   | 820.09   |
| 1.25    | 0.10    | 0.09    | 186.69  | 75.00   | 219.66   | 94.77    |
| 4092.03 | 4737.59 | 4352.33 | 7437.25 | 7260.98 | 1482.99  | 1392.55  |
| 1923.46 | 2302.77 | 1940.09 | 1754.95 | 1517.29 | 1572.81  | 1727.93  |
| 32.18   | 41.04   | 37.67   | 101.48  | 32.02   | 369.35   | 704.23   |
| 153.27  | 0.10    | 0.09    | 52.30   | 149.50  | 61.04    | 188.26   |
| 19.87   | 0.62    | 3.99    | 973.77  | 906.83  | 622.35   | 383.20   |
| 0.05    | 0.10    | 0.09    | 671.92  | 1284.85 | 24.27    | 0.04     |
| 2.26    | 34.24   | 7.23    | 0.03    | 0.03    | 0.04     | 0.04     |
| 7.65    | 0.10    | 0.09    | 0.03    | 0.03    | 0.04     | 0.04     |
| 3179.31 | 3671.03 | 2303.67 | 1467.80 | 1457.57 | 3626.13  | 5375.78  |
| 0.05    | 18.82   | 0.09    | 2328.78 | 2411.93 | 535.88   | 194.08   |
| 5267.73 | 7764.04 | 6665.26 | 3719.82 | 3957.81 | 11822.73 | 12844.65 |
| 22.28   | 24.39   | 22.80   | 3.57    | 3.58    | 99.47    | 44.69    |
| 2431.02 | 2266.90 | 3033.96 | 0.03    | 25.35   | 5.27     | 11.75    |
| 0.05    | 0.10    | 0.09    | 1.13    | 0.03    | 0.04     | 0.04     |
| 0.05    | 21.95   | 0.09    | 7.71    | 86.25   | 1.25     | 83.29    |

|         |         |          |         |         |         |         |
|---------|---------|----------|---------|---------|---------|---------|
| 311.05  | 948.14  | 802.50   | 299.80  | 340.11  | 1053.73 | 836.17  |
| 6.04    | 0.10    | 0.09     | 32.10   | 31.11   | 119.17  | 74.55   |
| 176.63  | 81.18   | 93.84    | 3321.78 | 2213.56 | 419.24  | 259.54  |
| 6.10    | 30.40   | 533.38   | 315.13  | 288.99  | 130.55  | 16.62   |
| 1557.11 | 757.19  | 806.31   | 1424.60 | 1231.89 | 524.82  | 309.47  |
| 215.82  | 536.62  | 479.79   | 292.28  | 289.05  | 251.66  | 375.29  |
| 549.57  | 317.20  | 678.24   | 1914.16 | 1996.07 | 155.41  | 114.41  |
| 0.05    | 0.10    | 0.09     | 0.03    | 0.03    | 15.92   | 0.04    |
| 538.95  | 361.83  | 171.65   | 479.90  | 439.17  | 478.03  | 393.39  |
| 0.05    | 0.10    | 0.09     | 0.03    | 0.03    | 2.34    | 0.04    |
| 68.55   | 0.10    | 0.09     | 676.36  | 780.34  | 0.04    | 0.04    |
| 63.70   | 19.03   | 10.85    | 211.74  | 214.83  | 0.04    | 0.04    |
| 0.05    | 0.10    | 0.09     | 0.03    | 0.03    | 0.04    | 3.44    |
| 14.10   | 11.49   | 12.62    | 0.03    | 0.92    | 136.68  | 6.49    |
| 257.09  | 265.66  | 169.17   | 353.20  | 235.68  | 0.04    | 0.04    |
| 0.05    | 0.10    | 0.09     | 0.03    | 0.03    | 0.04    | 0.04    |
| 350.07  | 1725.67 | 1155.65  | 20.68   | 35.91   | 174.94  | 84.45   |
| 633.17  | 709.08  | 583.39   | 0.03    | 0.03    | 0.04    | 0.04    |
| 1218.80 | 1658.96 | 1698.49  | 0.03    | 0.03    | 1074.42 | 1680.03 |
| 0.05    | 80.87   | 92.14    | 0.03    | 0.03    | 0.04    | 0.04    |
| 46.61   | 80.29   | 60.30    | 1715.73 | 1900.66 | 1404.49 | 1048.13 |
| 0.05    | 26.82   | 8.36     | 0.03    | 2.28    | 0.04    | 10.29   |
| 0.37    | 1.25    | 2.09     | 224.86  | 123.55  | 0.04    | 0.04    |
| 0.71    | 112.87  | 33.25    | 2.17    | 0.91    | 4.52    | 9.49    |
| 565.81  | 139.16  | 842.02   | 615.24  | 530.07  | 1368.41 | 1263.87 |
| 9.09    | 54.85   | 0.09     | 191.53  | 193.26  | 76.54   | 54.22   |
| 3.04    | 0.10    | 0.09     | 0.03    | 0.38    | 152.85  | 7.11    |
| 103.51  | 63.25   | 98.95    | 491.20  | 529.45  | 725.37  | 537.79  |
| 17.98   | 0.10    | 0.09     | 16.68   | 0.03    | 8.31    | 41.57   |
| 0.05    | 371.00  | 118.77   | 490.04  | 427.75  | 0.04    | 0.04    |
| 57.27   | 375.69  | 624.90   | 719.64  | 662.59  | 0.04    | 0.04    |
| 5317.31 | 9572.04 | 11667.46 | 1699.73 | 2033.71 | 7870.81 | 8887.10 |
| 367.98  | 1689.34 | 982.49   | 0.03    | 0.03    | 1499.27 | 1508.95 |
| 700.31  | 72.77   | 72.71    | 689.20  | 706.24  | 40.54   | 202.80  |
| 126.15  | 9.29    | 16.56    | 0.89    | 8.04    | 12.93   | 0.04    |
| 6.23    | 0.10    | 1.22     | 0.03    | 0.03    | 2.01    | 0.04    |
| 0.05    | 5.50    | 16.09    | 0.03    | 0.03    | 0.04    | 0.04    |

|         |         |         |         |         |         |         |
|---------|---------|---------|---------|---------|---------|---------|
| 1103.21 | 2704.39 | 2174.45 | 88.33   | 143.42  | 2286.74 | 3281.74 |
| 53.19   | 0.10    | 0.09    | 0.03    | 0.03    | 40.84   | 35.98   |
| 0.05    | 0.10    | 0.09    | 92.10   | 35.40   | 269.65  | 915.77  |
| 0.05    | 0.10    | 0.09    | 0.03    | 0.03    | 0.04    | 0.04    |
| 106.12  | 27.32   | 10.72   | 26.63   | 25.48   | 93.21   | 65.10   |
| 344.75  | 0.10    | 0.09    | 0.03    | 0.03    | 0.04    | 0.04    |
| 717.11  | 1112.91 | 1029.32 | 145.15  | 213.58  | 525.03  | 2544.78 |
| 42.59   | 730.85  | 538.21  | 1333.04 | 769.65  | 206.91  | 497.03  |
| 157.29  | 283.90  | 215.58  | 716.61  | 689.19  | 176.88  | 517.33  |
| 0.05    | 0.10    | 0.09    | 0.03    | 0.03    | 0.04    | 0.04    |
| 0.05    | 0.10    | 0.09    | 63.28   | 18.89   | 0.04    | 61.55   |
| 33.37   | 13.37   | 0.09    | 0.03    | 0.03    | 0.04    | 0.04    |
| 518.21  | 500.44  | 432.92  | 3257.96 | 3475.08 | 450.25  | 494.35  |
| 1709.55 | 942.30  | 817.90  | 195.75  | 182.87  | 1306.69 | 2390.65 |
| 0.05    | 0.10    | 3.50    | 13.02   | 11.29   | 20.32   | 6.15    |
| 66.89   | 77.30   | 67.82   | 110.02  | 250.12  | 95.35   | 56.99   |
| 816.89  | 70.93   | 28.04   | 430.06  | 542.46  | 145.49  | 374.53  |
| 1507.15 | 267.36  | 236.39  | 317.19  | 625.31  | 1469.31 | 888.11  |
| 1376.69 | 1162.77 | 1268.57 | 96.66   | 100.52  | 104.44  | 115.68  |
| 58.54   | 670.02  | 596.64  | 172.93  | 260.14  | 41.70   | 25.85   |
| 1609.33 | 2597.49 | 3018.49 | 18.60   | 8.49    | 543.15  | 869.04  |
| 2524.62 | 2570.83 | 2718.82 | 534.09  | 463.50  | 307.59  | 93.19   |
| 156.77  | 35.64   | 25.90   | 147.13  | 141.81  | 261.29  | 382.84  |
| 0.05    | 241.98  | 124.88  | 0.81    | 23.56   | 4.96    | 18.71   |
| 1666.19 | 1668.68 | 1545.62 | 1636.96 | 1527.25 | 1963.84 | 1850.78 |
| 60.67   | 1695.60 | 1187.69 | 413.05  | 298.15  | 1069.97 | 205.40  |
| 2379.41 | 2358.85 | 2840.12 | 5895.71 | 6227.42 | 4369.41 | 5823.31 |
| 14.17   | 66.40   | 21.70   | 23.23   | 16.74   | 14.15   | 12.82   |
| 941.02  | 1804.31 | 1401.99 | 444.60  | 399.04  | 390.40  | 496.11  |
| 0.05    | 6.47    | 9.51    | 39.41   | 3.48    | 9.93    | 130.83  |
| 1252.51 | 248.64  | 201.70  | 335.58  | 296.28  | 1007.96 | 1280.87 |
| 0.05    | 0.10    | 0.09    | 0.03    | 0.03    | 0.04    | 0.04    |
| 0.05    | 0.10    | 0.09    | 0.03    | 0.03    | 0.04    | 0.04    |
| 119.53  | 26.05   | 12.06   | 244.60  | 212.04  | 446.01  | 128.25  |
| 821.65  | 20.95   | 13.82   | 504.99  | 517.72  | 0.04    | 0.04    |
| 0.05    | 0.10    | 0.09    | 333.05  | 250.33  | 0.04    | 0.04    |
| 314.71  | 385.13  | 492.96  | 0.03    | 15.79   | 730.56  | 23.88   |

|         |         |         |         |         |          |         |
|---------|---------|---------|---------|---------|----------|---------|
| 30.16   | 0.78    | 0.09    | 56.08   | 113.39  | 45.85    | 0.04    |
| 30.43   | 9.23    | 1.81    | 0.03    | 0.03    | 0.04     | 0.04    |
| 0.05    | 0.10    | 0.09    | 1.73    | 10.08   | 0.04     | 0.04    |
| 30.23   | 9.86    | 26.75   | 0.03    | 0.03    | 31.34    | 1.27    |
| 962.08  | 91.68   | 331.74  | 39.70   | 71.53   | 327.07   | 911.46  |
| 31.19   | 0.10    | 0.09    | 2.69    | 17.43   | 0.04     | 18.24   |
| 1258.18 | 511.63  | 817.31  | 0.03    | 0.03    | 290.90   | 0.04    |
| 56.82   | 10.02   | 85.53   | 0.03    | 0.03    | 0.04     | 0.04    |
| 496.55  | 230.89  | 344.34  | 1971.38 | 2113.18 | 2969.98  | 2274.31 |
| 2775.86 | 3440.98 | 4136.19 | 1858.76 | 1648.80 | 2596.68  | 4831.43 |
| 0.05    | 11.57   | 0.09    | 682.93  | 621.10  | 0.04     | 0.04    |
| 1685.27 | 2397.85 | 1068.59 | 150.67  | 237.79  | 1427.43  | 1674.18 |
| 2.16    | 5.55    | 20.78   | 1.67    | 8.77    | 49.20    | 19.00   |
| 0.05    | 0.10    | 0.09    | 3.69    | 0.03    | 9.66     | 10.36   |
| 1.72    | 3.99    | 89.23   | 125.69  | 80.33   | 107.45   | 47.60   |
| 9.51    | 22.83   | 11.00   | 334.89  | 254.88  | 65.68    | 0.04    |
| 180.65  | 329.22  | 81.15   | 1.44    | 9.40    | 22.75    | 25.26   |
| 14.60   | 39.68   | 92.39   | 286.37  | 321.58  | 22.22    | 0.04    |
| 1627.04 | 330.33  | 159.05  | 1219.13 | 1774.16 | 1016.70  | 2270.75 |
| 0.05    | 0.10    | 0.09    | 0.03    | 0.03    | 0.04     | 0.04    |
| 45.00   | 41.57   | 8.49    | 414.12  | 599.00  | 140.98   | 26.05   |
| 2641.99 | 280.64  | 510.43  | 337.34  | 367.96  | 1304.09  | 1677.27 |
| 2.38    | 12.07   | 2.47    | 306.56  | 375.99  | 6.09     | 2.45    |
| 12.74   | 114.35  | 23.17   | 46.80   | 5.84    | 0.04     | 0.04    |
| 0.05    | 371.41  | 431.80  | 0.03    | 15.54   | 0.04     | 0.04    |
| 1606.76 | 2107.72 | 2148.67 | 2865.33 | 2543.57 | 629.81   | 1060.49 |
| 113.68  | 318.73  | 271.37  | 170.06  | 209.73  | 233.16   | 264.25  |
| 214.58  | 617.86  | 495.01  | 284.62  | 345.43  | 1266.63  | 2586.59 |
| 222.48  | 0.10    | 0.09    | 0.03    | 0.03    | 0.04     | 0.04    |
| 0.05    | 0.10    | 0.09    | 156.37  | 387.24  | 245.84   | 0.04    |
| 3343.73 | 1748.89 | 1403.05 | 1312.55 | 1284.63 | 7846.55  | 7858.70 |
| 694.64  | 120.83  | 229.43  | 0.03    | 0.03    | 111.62   | 360.53  |
| 2043.65 | 7634.58 | 8408.82 | 7558.41 | 7440.31 | 16253.09 | 7416.23 |
| 112.30  | 39.57   | 36.69   | 33.21   | 24.10   | 106.06   | 196.46  |
| 413.05  | 118.93  | 77.46   | 31.18   | 49.45   | 36.80    | 7.20    |
| 170.56  | 0.10    | 1.44    | 46.51   | 52.46   | 20.32    | 0.04    |
| 7052.57 | 2035.66 | 1747.81 | 1022.72 | 1149.40 | 0.04     | 0.96    |

|         |         |         |         |         |         |         |
|---------|---------|---------|---------|---------|---------|---------|
| 0.05    | 0.10    | 0.09    | 3.62    | 7.77    | 17.93   | 33.53   |
| 50.03   | 8.11    | 9.08    | 75.87   | 24.94   | 808.87  | 129.32  |
| 105.25  | 45.57   | 51.44   | 0.03    | 0.03    | 0.04    | 0.04    |
| 112.76  | 16.57   | 123.82  | 135.41  | 116.40  | 1136.85 | 1700.40 |
| 1823.20 | 552.47  | 367.91  | 167.64  | 197.04  | 108.70  | 122.11  |
| 9.28    | 0.10    | 0.09    | 44.67   | 8.70    | 253.76  | 23.99   |
| 0.05    | 0.10    | 0.09    | 0.03    | 0.03    | 0.04    | 0.04    |
| 0.05    | 8.28    | 0.09    | 1393.46 | 1218.93 | 0.04    | 0.04    |
| 12.73   | 120.10  | 90.41   | 54.22   | 99.37   | 0.04    | 0.04    |
| 3.63    | 70.88   | 75.47   | 57.04   | 79.62   | 48.75   | 28.10   |
| 179.69  | 440.18  | 224.50  | 2800.63 | 3339.28 | 1202.86 | 1961.73 |
| 2272.45 | 1357.16 | 929.47  | 4254.84 | 3580.52 | 4464.41 | 5944.34 |
| 9.58    | 60.26   | 0.09    | 3.01    | 0.03    | 17.14   | 3.67    |
| 341.08  | 155.46  | 184.75  | 169.03  | 158.63  | 1037.86 | 3116.10 |
| 84.67   | 165.80  | 183.98  | 130.77  | 401.41  | 16.88   | 80.62   |
| 32.05   | 10.24   | 11.80   | 4.51    | 6.56    | 52.62   | 99.47   |
| 362.74  | 387.53  | 588.20  | 47.32   | 21.69   | 0.04    | 0.04    |
| 0.05    | 0.10    | 0.09    | 0.03    | 0.03    | 0.04    | 0.04    |
| 9.37    | 0.10    | 0.09    | 59.62   | 0.05    | 0.04    | 0.04    |
| 0.05    | 0.10    | 0.09    | 0.03    | 0.03    | 0.04    | 0.04    |
| 5791.58 | 56.04   | 213.29  | 1822.76 | 2686.90 | 1136.03 | 1906.62 |
| 46.33   | 130.96  | 94.02   | 17.12   | 11.67   | 0.04    | 0.04    |
| 43.37   | 8.78    | 0.09    | 27.54   | 147.75  | 28.30   | 12.18   |
| 129.20  | 87.73   | 63.95   | 6732.19 | 7129.03 | 4183.59 | 6737.20 |
| 5669.72 | 1646.29 | 1104.25 | 703.93  | 843.94  | 745.68  | 163.43  |
| 7.08    | 0.10    | 0.09    | 0.03    | 4.35    | 0.04    | 0.04    |
| 169.10  | 472.13  | 379.40  | 199.00  | 216.10  | 354.45  | 461.54  |
| 46.53   | 1564.36 | 1116.09 | 0.03    | 0.03    | 0.04    | 0.04    |
| 216.44  | 0.10    | 0.09    | 18.34   | 117.75  | 60.10   | 67.27   |
| 238.17  | 1314.63 | 796.08  | 0.03    | 0.03    | 37.43   | 0.04    |
| 122.12  | 2034.90 | 2207.33 | 221.90  | 194.41  | 780.21  | 982.76  |
| 0.20    | 3.43    | 0.09    | 397.89  | 261.28  | 6.50    | 0.34    |
| 172.08  | 167.64  | 140.20  | 117.85  | 98.11   | 754.02  | 997.82  |
| 58.60   | 64.77   | 190.57  | 89.70   | 155.49  | 377.16  | 605.17  |
| 180.34  | 184.80  | 172.59  | 209.16  | 208.86  | 939.16  | 1328.26 |
| 992.59  | 1202.73 | 616.94  | 6026.82 | 6191.50 | 361.34  | 167.86  |
| 304.24  | 1159.12 | 981.07  | 22.37   | 16.17   | 18.63   | 0.04    |

|          |         |          |          |          |          |          |
|----------|---------|----------|----------|----------|----------|----------|
| 314.97   | 499.24  | 342.71   | 877.13   | 789.44   | 919.87   | 706.42   |
| 23.03    | 22.71   | 45.55    | 1433.51  | 569.70   | 62.61    | 117.15   |
| 747.55   | 350.28  | 340.47   | 130.33   | 146.64   | 577.68   | 849.51   |
| 710.83   | 1024.90 | 951.66   | 2234.78  | 2915.41  | 373.80   | 466.85   |
| 292.41   | 376.18  | 323.70   | 344.90   | 333.05   | 628.21   | 783.16   |
| 0.05     | 0.10    | 0.09     | 250.49   | 191.84   | 10.99    | 0.04     |
| 421.60   | 0.10    | 0.09     | 6.17     | 8.82     | 4.93     | 1.17     |
| 72.95    | 0.10    | 0.09     | 1.30     | 1.85     | 0.04     | 0.04     |
| 0.05     | 0.10    | 49.42    | 0.03     | 0.03     | 0.04     | 34.18    |
| 285.22   | 290.42  | 157.26   | 1198.89  | 2070.24  | 1072.66  | 820.29   |
| 632.64   | 0.10    | 3.59     | 0.03     | 4.49     | 5.92     | 2.25     |
| 0.05     | 0.10    | 0.09     | 0.64     | 0.03     | 21.24    | 0.04     |
| 27.96    | 0.10    | 8.66     | 12.60    | 14.39    | 105.75   | 74.93    |
| 22469.37 | 8583.22 | 10282.16 | 11190.94 | 9980.45  | 17336.42 | 6786.74  |
| 22.88    | 42.87   | 37.33    | 0.46     | 3.65     | 0.04     | 0.04     |
| 10.58    | 5.96    | 8.71     | 5.73     | 0.03     | 164.24   | 7.65     |
| 326.64   | 4.36    | 0.09     | 445.51   | 160.51   | 14.96    | 9.13     |
| 440.89   | 0.10    | 0.09     | 2.14     | 34.82    | 14.32    | 76.00    |
| 579.14   | 31.47   | 38.21    | 734.36   | 904.90   | 277.27   | 404.61   |
| 12876.19 | 4914.35 | 5344.86  | 10777.48 | 12335.02 | 28679.16 | 26671.86 |
| 608.77   | 70.09   | 305.08   | 28.48    | 1.61     | 1096.12  | 919.07   |
| 507.43   | 330.77  | 891.39   | 1667.58  | 1809.35  | 88.05    | 558.64   |
| 22.42    | 30.48   | 23.08    | 15.54    | 7.74     | 12.83    | 9.79     |
| 138.79   | 68.61   | 72.28    | 250.03   | 249.37   | 0.04     | 8.28     |
| 934.19   | 520.69  | 197.61   | 0.03     | 7.74     | 6.10     | 2.21     |
| 482.31   | 659.88  | 679.31   | 621.06   | 596.33   | 552.09   | 570.01   |
| 121.37   | 0.10    | 4.95     | 109.06   | 213.05   | 154.17   | 153.50   |
| 2881.56  | 404.08  | 1487.93  | 1239.53  | 1358.81  | 5316.94  | 3479.35  |
| 0.05     | 24.79   | 15.31    | 1.17     | 17.96    | 15.49    | 0.04     |
| 0.59     | 11.28   | 0.09     | 0.03     | 0.03     | 0.04     | 0.04     |
| 339.96   | 915.41  | 778.70   | 631.18   | 662.04   | 851.96   | 681.26   |
| 0.05     | 1.24    | 0.09     | 0.03     | 0.03     | 0.04     | 0.04     |
| 6.69     | 13.15   | 11.22    | 11.00    | 3.99     | 0.04     | 0.04     |
| 0.05     | 0.10    | 2.35     | 6.55     | 1.61     | 847.98   | 313.14   |
| 0.05     | 15.05   | 36.77    | 736.27   | 702.89   | 39.68    | 28.36    |
| 13.33    | 27.54   | 0.09     | 3.07     | 2.15     | 28.98    | 62.43    |
| 172.99   | 85.44   | 39.18    | 1535.36  | 1252.73  | 580.21   | 404.45   |

|         |         |         |         |         |         |         |
|---------|---------|---------|---------|---------|---------|---------|
| 1.49    | 11.65   | 0.87    | 50.22   | 10.26   | 499.10  | 154.84  |
| 19.25   | 0.10    | 0.09    | 0.03    | 0.03    | 66.78   | 106.83  |
| 0.05    | 0.10    | 3.77    | 273.16  | 347.97  | 25.65   | 0.04    |
| 565.20  | 943.43  | 1337.40 | 1187.26 | 1092.39 | 63.59   | 8.00    |
| 0.05    | 0.10    | 0.09    | 21.32   | 9.61    | 1284.99 | 81.17   |
| 20.35   | 22.57   | 6.65    | 175.97  | 72.74   | 0.04    | 0.04    |
| 237.62  | 855.04  | 729.05  | 2275.24 | 2304.94 | 693.68  | 1383.31 |
| 3.14    | 18.25   | 7.37    | 3.13    | 1.50    | 1.28    | 5.74    |
| 603.48  | 334.43  | 288.71  | 409.38  | 310.18  | 163.76  | 134.37  |
| 1553.88 | 898.83  | 967.98  | 465.83  | 359.60  | 666.72  | 961.70  |
| 789.36  | 276.95  | 293.12  | 351.56  | 475.60  | 657.04  | 210.33  |
| 1908.31 | 3930.19 | 3041.14 | 1381.91 | 755.91  | 598.57  | 589.16  |
| 1941.96 | 1562.91 | 2008.89 | 3237.23 | 3077.16 | 5714.58 | 3507.00 |
| 782.66  | 2148.76 | 3748.60 | 3516.89 | 3472.05 | 1561.20 | 575.71  |
| 181.32  | 71.16   | 83.23   | 13.73   | 22.14   | 181.37  | 99.86   |
| 3357.40 | 4259.92 | 3385.10 | 4201.71 | 4067.32 | 2196.70 | 2221.86 |
| 0.05    | 1.64    | 0.09    | 0.03    | 0.03    | 0.04    | 0.04    |
| 415.74  | 147.82  | 160.42  | 208.46  | 264.74  | 67.00   | 0.04    |
| 1030.57 | 411.40  | 338.52  | 311.27  | 375.36  | 1148.16 | 1565.55 |
| 1440.10 | 1662.83 | 1534.30 | 1817.28 | 1850.38 | 2891.84 | 4498.02 |
| 12.30   | 0.10    | 23.54   | 2.71    | 5.65    | 0.04    | 0.04    |
| 408.28  | 406.33  | 314.20  | 355.68  | 313.18  | 954.26  | 683.31  |
| 52.02   | 70.21   | 117.10  | 215.58  | 322.20  | 871.45  | 910.93  |
| 130.47  | 2.63    | 3.33    | 1275.12 | 983.62  | 36.85   | 126.15  |
| 0.05    | 9.39    | 59.05   | 743.50  | 489.43  | 0.04    | 0.04    |
| 11.30   | 0.10    | 1.20    | 1.20    | 8.47    | 0.04    | 5.17    |
| 0.05    | 0.10    | 0.09    | 0.03    | 0.03    | 0.04    | 0.04    |
| 1.46    | 0.10    | 0.09    | 0.03    | 0.03    | 0.04    | 1.24    |
| 409.57  | 1190.11 | 1162.10 | 10.65   | 25.49   | 69.45   | 177.62  |
| 282.23  | 169.87  | 199.78  | 624.58  | 236.76  | 229.28  | 105.38  |
| 0.05    | 0.10    | 1.41    | 5.63    | 0.03    | 0.90    | 0.04    |
| 0.05    | 0.10    | 0.09    | 0.03    | 0.03    | 0.04    | 1.47    |
| 851.58  | 25.65   | 33.51   | 1057.76 | 901.47  | 298.59  | 93.31   |
| 702.84  | 1348.07 | 2126.49 | 0.03    | 0.03    | 344.15  | 520.90  |
| 0.05    | 0.10    | 0.09    | 0.03    | 0.03    | 273.25  | 284.70  |
| 1.41    | 0.10    | 0.09    | 1.07    | 0.26    | 1.82    | 0.87    |
| 1.99    | 0.10    | 0.09    | 0.03    | 0.03    | 0.04    | 0.04    |

|         |         |         |        |        |         |         |
|---------|---------|---------|--------|--------|---------|---------|
| 7.07    | 4.78    | 7.62    | 0.03   | 1.99   | 1.52    | 7.79    |
| 376.78  | 783.08  | 869.83  | 0.03   | 0.03   | 0.04    | 0.04    |
| 1063.97 | 2693.40 | 1759.30 | 376.61 | 362.68 | 1057.81 | 1223.70 |
